# Supplementary material for: Is the polarization of the CC bond imperative for bifunctional outer-sphere CC hydrogenation?
Source: Royal Society of Chemistry journal article supplement (doi:10.1039/d2qo02020c), 2023-01-01
Supplement: d2qo02020c1.pdf [file d2qo02020c1.pdf]

# Supporting Information

## for

### Is the Polarization of the C=C Bond Imperative for the Bifunctional Outer-Sphere C=C Hydrogenation?

Xinliang Ai,<sup>a+</sup> Xiaofeng Xie,<sup>a+</sup> Xueqing Song,<sup>a</sup> Longfei Li<sup>a\*</sup> and Henry F. Schaefer, III<sup>b\*</sup>

<sup>a</sup> College of Pharmacy, Key Laboratory of Pharmaceutical Quality Control of Hebei Province, Key Laboratory of Medicinal Chemistry and Molecular Diagnosis of Ministry of Education, Hebei University, Baoding 071002, Hebei, P. R. China

<sup>b</sup> Center for Computational Quantum Chemistry, University of Georgia, Athens, Georgia 30602, United States

+ These authors contributed equally to this work.

\*Email: lilongfei@hbu.edu.cn (L.L.); ccq@uga.edu (H.F.S.)

|                                                                                                                                                                                                                                                                                                                              |     |
|------------------------------------------------------------------------------------------------------------------------------------------------------------------------------------------------------------------------------------------------------------------------------------------------------------------------------|-----|
| Table S1. The computed potential energies ( $E$ , a.u.) and relative potential energies ( $\Delta E$ , kcal/mol) at the $\omega$ B97X-D/BS-II level. The relative Gibbs free energies ( $\Delta G$ , 298K) are in kcal/mol. ....                                                                                             | S2  |
| Table S2. The imaginary frequencies (in $\text{cm}^{-1}$ ) of transition states at the $\omega$ B97X-D/BS-I level....                                                                                                                                                                                                        | S4  |
| Figure S1. The pathways for the bifunctional outer-sphere C=C hydrogenations by the Mn pincer complex A1.....                                                                                                                                                                                                                | S7  |
| Figure S2. The comparisons between triplet states and singlet states of Mn pincer complexes in the outer-sphere C=C hydrogenation.....                                                                                                                                                                                       | S9  |
| Figure S3. The energy barriers of hydrogen addition processes ( $\Delta G^\ddagger$ in kcal/mol), the LUMO and HOMO energies for alkene derivatives. $\text{BPI}_{\text{C}(1)=\text{C}(2)}$ denotes the bond polarity index of C(1)=C(2) bond, and Per denotes the percentage of ionic portion in total NRT bond order. .... | S10 |
| Figure S4. The energy profiles for the asymmetric outer-sphere bifunctional hydrogenation of (1-chlorovinyl)benzene catalyzed by designed Mn complex. The relative Gibbs free energies ( $\Delta G$ ) are in kcal/mol. ....                                                                                                  | S12 |
| Figure S5. The predicted enantiomeric excess (ee) for (1-fluorovinyl)benzene, (1-chlorovinyl)benzene, the corresponding equation. The relative Gibbs free energies ( $\Delta G$ ) are in kcal/mol. ....                                                                                                                      | S13 |
| Cartesian coordinates of all stationary points optimized at $\omega$ B97X-D/BS-I level in toluene solvent. ....                                                                                                                                                                                                              | S14 |

## Energy summary.

Table S1. The computed potential energies ( $E$ , a.u.) and relative potential energies ( $\Delta E$ , kcal/mol) at the  $\omega$ B97X-D/BS-II level. The relative Gibbs free energies ( $\Delta G$ , 298K) are in kcal/mol.

| Complex                 | $E$        | $\Delta E$ | $G$        | $\Delta G$ |
|-------------------------|------------|------------|------------|------------|
| A1                      | -2153.5931 | 0.0        | -2153.1291 | 0.0        |
| A1_triplet              | -2153.5446 | 30.4       | -2153.0898 | 24.6       |
| TS1_H                   | -2232.1632 | 11.1       | -2231.6508 | 23.4       |
| TS2_CH <sub>3</sub>     | -2271.4813 | 13.3       | -2270.9399 | 27.6       |
| TS1_CH <sub>3</sub>     | -2271.4770 | 16.1       | -2270.9379 | 28.9       |
| TS2_Ph                  | -2463.2141 | 12.8       | -2462.6256 | 26.3       |
| TS1_Ph                  | -2463.2313 | 2.0        | -2462.6434 | 15.1       |
| TS2_F                   | -2331.4114 | 10.6       | -2330.9070 | 23.7       |
| TS1_F                   | -2331.4040 | 15.3       | -2330.9037 | 25.7       |
| TS2_NH <sub>2</sub>     | -2287.5205 | 18.3       | -2286.9914 | 31.3       |
| TS1_NH <sub>2</sub>     | -2287.5154 | 21.4       | -2286.9874 | 33.8       |
| TS2_SH                  | -2630.3704 | 11.7       | -2629.8590 | 25.6       |
| TS1_SH                  | -2630.3761 | 8.2        | -2629.8643 | 22.3       |
| TS2_OH                  | -2307.3889 | 15.8       | -2306.8716 | 29.1       |
| TS1_OH                  | -2307.3808 | 20.8       | -2306.8657 | 32.8       |
| TS2_CHO                 | -2345.4936 | 10.9       | -2344.9736 | 23.8       |
| TS1_CHO                 | -2345.5195 | -5.3       | -2344.9994 | 7.7        |
| TS2_CH=CH <sub>2</sub>  | -2309.5590 | 15.3       | -2309.0147 | 28.8       |
| TS1_CH=CH <sub>2</sub>  | -2309.5756 | 4.8        | -2309.0316 | 18.2       |
| TS2_C≡CH                | -2308.2994 | 14.7       | -2307.7794 | 27.7       |
| TS1_C≡CH                | -2308.3205 | 1.5        | -2307.8009 | 14.2       |
| TS2_Ph-NO <sub>2</sub>  | -2667.7322 | 9.2        | -2667.1437 | 23.8       |
| TS1_Ph-NO <sub>2</sub>  | -2667.7519 | -3.2       | -2667.1648 | 10.5       |
| TS2_Ph-OCH <sub>3</sub> | -2577.7394 | 15.5       | -2577.1225 | 28.6       |
| TS1_Ph-OCH <sub>3</sub> | -2577.7545 | 5.9        | -2577.1384 | 18.6       |
| A2_NH <sub>2</sub>      | -2152.3848 | -13.5      | -2151.9439 | -13.3      |
| A2_OH                   | -2152.3848 | -16.6      | -2151.9439 | -16.7      |
| A2_CH <sub>3</sub>      | -2152.3848 | -19.8      | -2151.9439 | -19.7      |
| A2_F                    | -2152.3848 | -21.7      | -2151.9439 | -21.7      |
| A2_H                    | -2152.3848 | -23.2      | -2151.9439 | -23.0      |
| A2_H_triplet            | -2152.3540 | -3.9       | -2151.9204 | -8.2       |
| A2_SH                   | -2152.3848 | -21.1      | -2151.9439 | -20.5      |
| A2_Ph-OCH <sub>3</sub>  | -2152.3848 | -17.1      | -2151.9439 | -17.0      |
| A2_CH=CH <sub>2</sub>   | -2152.3848 | -16.6      | -2151.9439 | -17.1      |
| A2_Ph                   | -2152.3848 | -17.9      | -2151.9439 | -17.7      |
| A2_C≡CH                 | -2152.3848 | -19.8      | -2151.9439 | -20.1      |
| A2_Ph-NO <sub>2</sub>   | -2152.3848 | -18.7      | -2151.9439 | -19.7      |
| A2_CHO                  | -2152.3848 | -18.4      | -2151.9439 | -19.0      |
| A3_H                    | -2153.5591 | -22.0      | -2153.1029 | -11.3      |
| A3_Ph-OCH <sub>3</sub>  | -2577.7573 | 4.2        | -2577.1386 | 18.5       |
| A3_CH=CH <sub>2</sub>   | -2309.5777 | 3.6        | -2309.0319 | 18.0       |
| A3_Ph                   | -2463.2348 | -0.2       | -2462.6453 | 14.0       |
| A3_C≡CH                 | -2308.3271 | -2.6       | -2307.8058 | 11.1       |
| A3_Ph-NO <sub>2</sub>   | -2667.7687 | -13.8      | -2667.1774 | 2.6        |
| A3_CHO                  | -2345.5480 | -23.3      | -2345.0253 | -8.6       |

|                               |            |       |            |       |
|-------------------------------|------------|-------|------------|-------|
| <b>TS3_H</b>                  | -2153.5534 | -18.4 | -2153.0957 | -6.8  |
| <b>TS3_Ph-OCH<sub>3</sub></b> | -2577.7560 | 5.0   | -2577.1409 | 17.0  |
| <b>TS3_CH=CH<sub>2</sub></b>  | -2309.5750 | 5.2   | -2309.0329 | 17.4  |
| <b>TS3_Ph</b>                 | -2463.2331 | 0.9   | -2462.6445 | 14.5  |
| <b>TS3_C≡CH</b>               | -2308.3256 | -1.7  | -2307.8082 | 9.6   |
| <b>TS3_Ph-NO<sub>2</sub></b>  | -2667.7581 | -7.1  | -2667.1714 | 6.4   |
| <b>TS3_CHO</b>                | -2345.5256 | -9.2  | -2345.0066 | 3.2   |
| <b>B1</b>                     | -1927.4090 | 0.0   | -1926.9328 | 0.0   |
| <b>TSB1-2_a</b>               | -2336.2876 | 6.7   | -2335.6968 | 19.8  |
| <b>TSB1-2_b</b>               | -2336.2855 | 8.1   | -2335.6929 | 22.3  |
| <b>TSB1-2_c</b>               | -2336.2750 | 14.6  | -2335.6850 | 27.3  |
| <b>TSB1-2_d</b>               | -2336.2743 | 15.1  | -2335.6819 | 29.2  |
| <b>B2</b>                     | -1926.1950 | -14.9 | -1925.7425 | -15.4 |
| <b>B3</b>                     | -1927.3709 | -14.8 | -1926.9009 | -3.4  |
| <b>C1</b>                     | -1927.4090 | 0.0   | -1926.9328 | 0.0   |
| <b>TSB3-1</b>                 | -1927.3644 | -10.7 | -1926.8956 | -0.1  |
| <b>TSC1-2_a</b>               | -2696.6586 | 2.6   | -2696.0694 | 15.8  |
| <b>TSC1-2_b</b>               | -2696.6563 | 4.0   | -2696.0662 | 17.9  |
| <b>TSC1-2_c</b>               | -2696.6352 | 17.3  | -2696.0464 | 30.3  |
| <b>TSC1-2_d</b>               | -2696.6331 | 18.7  | -2696.0415 | 33.3  |
| <b>C2</b>                     | -1926.1950 | -16.8 | -1925.7425 | -17.0 |
| <b>C3</b>                     | -1927.3709 | -16.6 | -1926.9009 | -5.0  |
| <b>TSC3-1</b>                 | -1927.3644 | -12.6 | -1926.8956 | -1.7  |
| <b>C1'</b>                    | -1927.4090 | -40.6 | -1926.9328 | -25.0 |

---

Table S2. The imaginary frequencies (in  $\text{cm}^{-1}$ ) of transition states at the  $\omega\text{B97X-D/BS-I}$  level.

| Complex                 | Imaginary frequencies (in $\text{cm}^{-1}$ ) |
|-------------------------|----------------------------------------------|
| TS1_H                   | 508.69 <i>i</i>                              |
| TS2_CH <sub>3</sub>     | 501.19 <i>i</i>                              |
| TS1_CH <sub>3</sub>     | 539.27 <i>i</i>                              |
| TS2_Ph                  | 620.05 <i>i</i>                              |
| TS1_Ph                  | 779.71 <i>i</i>                              |
| TS2_F                   | 747.34 <i>i</i>                              |
| TS1_F                   | 775.27 <i>i</i>                              |
| TS2_NH <sub>2</sub>     | 449.18 <i>i</i>                              |
| TS1_NH <sub>2</sub>     | 606.81 <i>i</i>                              |
| TS2_SH                  | 537.77 <i>i</i>                              |
| TS1_SH                  | 676.68 <i>i</i>                              |
| TS2_OH                  | 524.38 <i>i</i>                              |
| TS1_OH                  | 746.05 <i>i</i>                              |
| TS2_CHO                 | 485.85 <i>i</i>                              |
| TS1_CHO                 | 439.80 <i>i</i>                              |
| TS2_CH=CH <sub>2</sub>  | 567.67 <i>i</i>                              |
| TS1_CH=CH <sub>2</sub>  | 732.41 <i>i</i>                              |
| TS2_C≡CH                | 706.60 <i>i</i>                              |
| TS1_C≡CH                | 759.00 <i>i</i>                              |
| TS2_Ph-NO <sub>2</sub>  | 576.19 <i>i</i>                              |
| TS1_Ph-NO <sub>2</sub>  | 906.08 <i>i</i>                              |
| TS2_Ph-OCH <sub>3</sub> | 604.76 <i>i</i>                              |
| TS1_Ph-OCH <sub>3</sub> | 705.04 <i>i</i>                              |
| TS3_H                   | 944.82 <i>i</i>                              |
| TS3_Ph-OCH <sub>3</sub> | 713.91 <i>i</i>                              |
| TS3_CH=CH <sub>2</sub>  | 948.08 <i>i</i>                              |
| TS3_Ph                  | 804.17 <i>i</i>                              |
| TS3_C≡CH                | 818.57 <i>i</i>                              |
| TS3_Ph-NO <sub>2</sub>  | 1430.80 <i>i</i>                             |
| TS3_CHO                 | 1270.45 <i>i</i>                             |
| TSB1-2_a                | 784.38 <i>i</i>                              |
| TSB1-2_b                | 717.65 <i>i</i>                              |
| TSB1-2_c                | 619.52 <i>i</i>                              |
| TSB1-2_d                | 558.72 <i>i</i>                              |
| TSC1-2_a                | 804.08 <i>i</i>                              |
| TSC1-2_b                | 798.48 <i>i</i>                              |
| TSC1-2_c                | 948.87 <i>i</i>                              |
| TSC1-2_d                | 918.53 <i>i</i>                              |
| TSB3-1                  | 1083.12 <i>i</i>                             |
| TSC3-1                  | 1083.12 <i>i</i>                             |

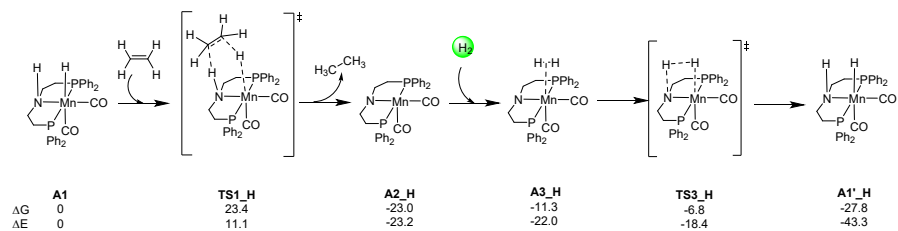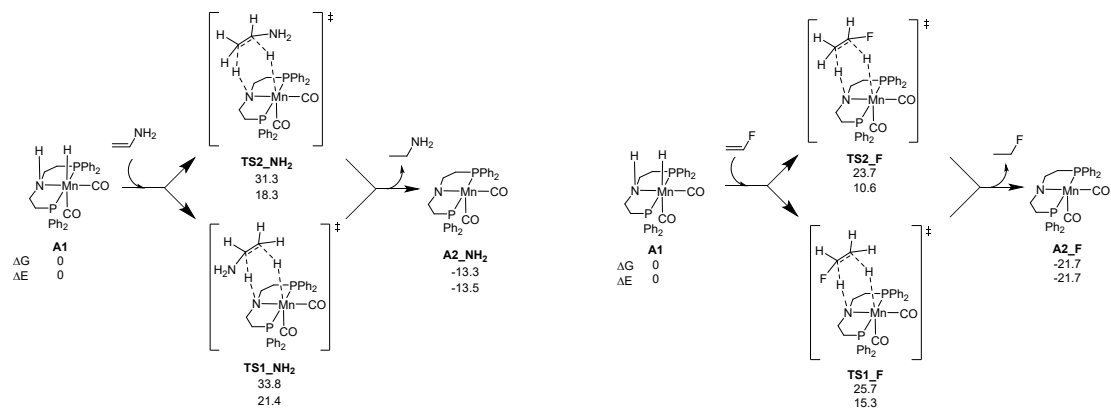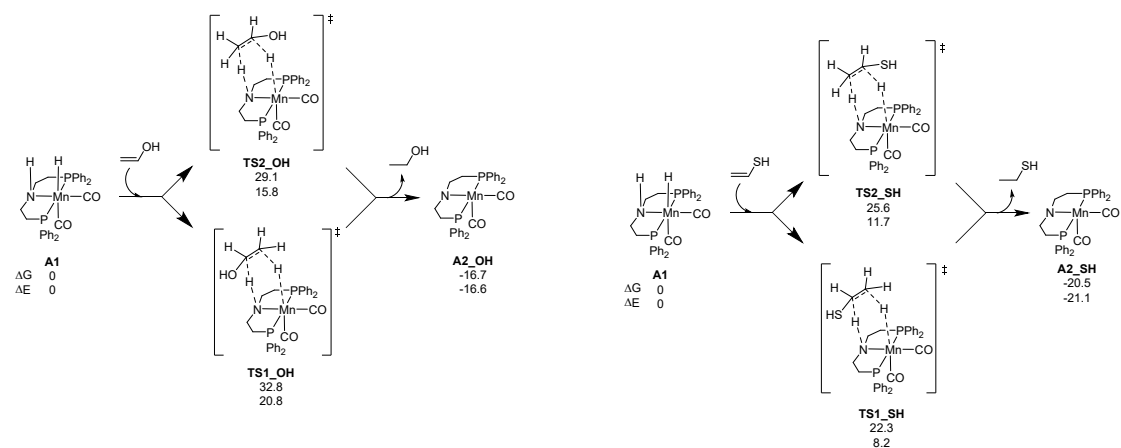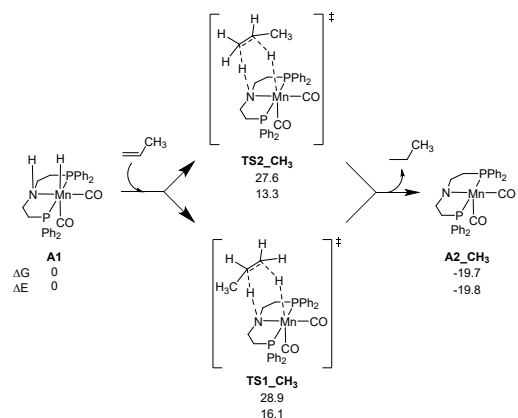

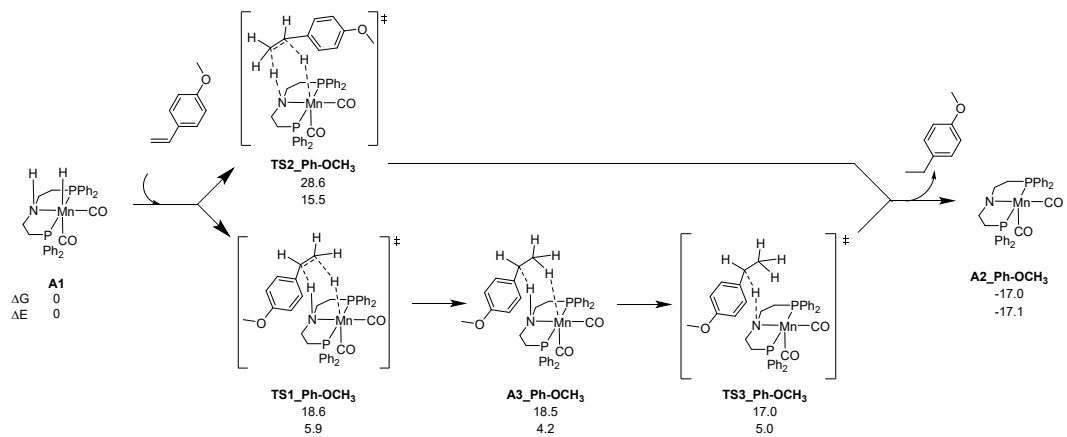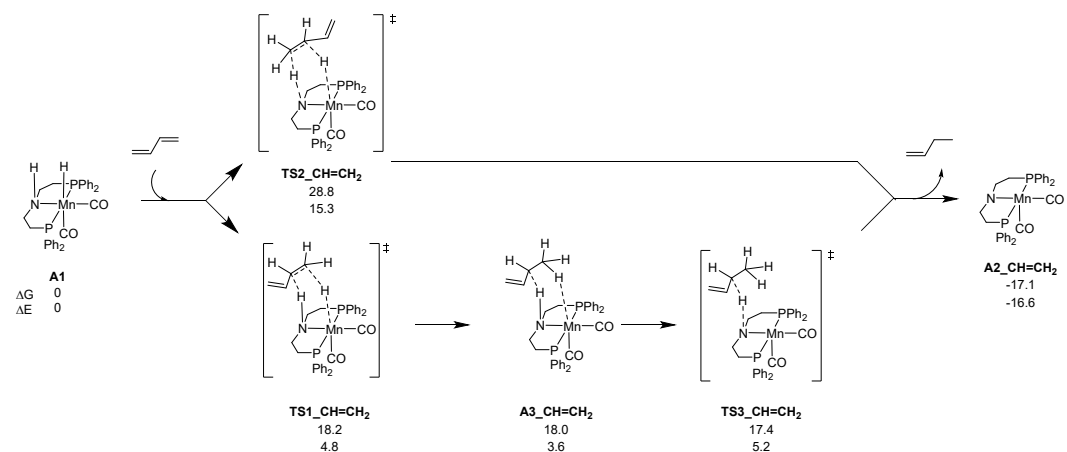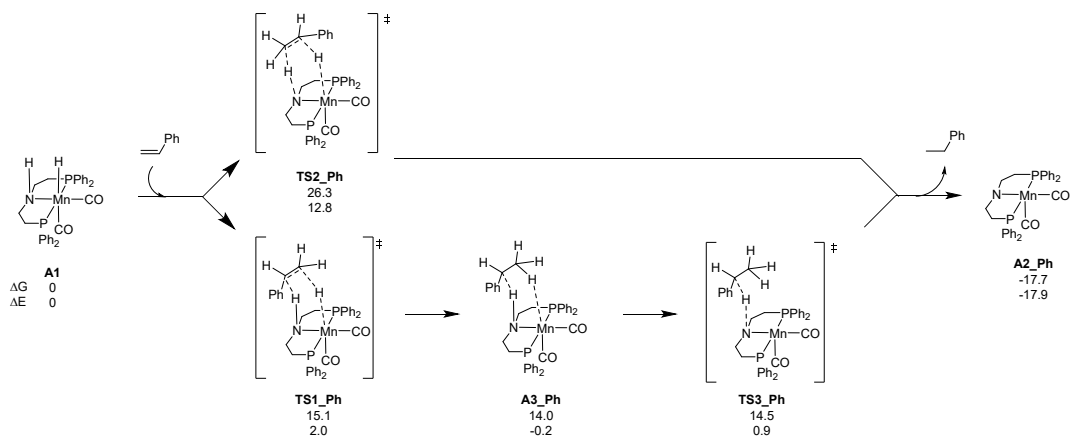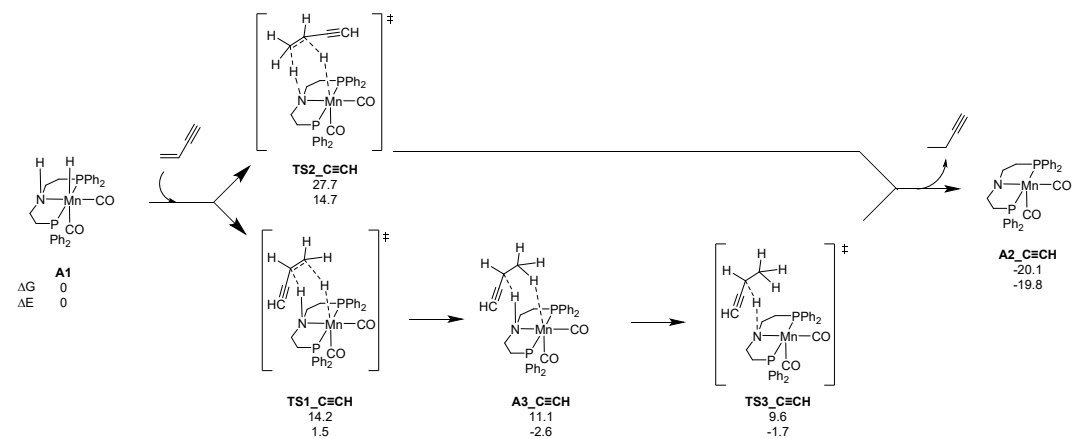

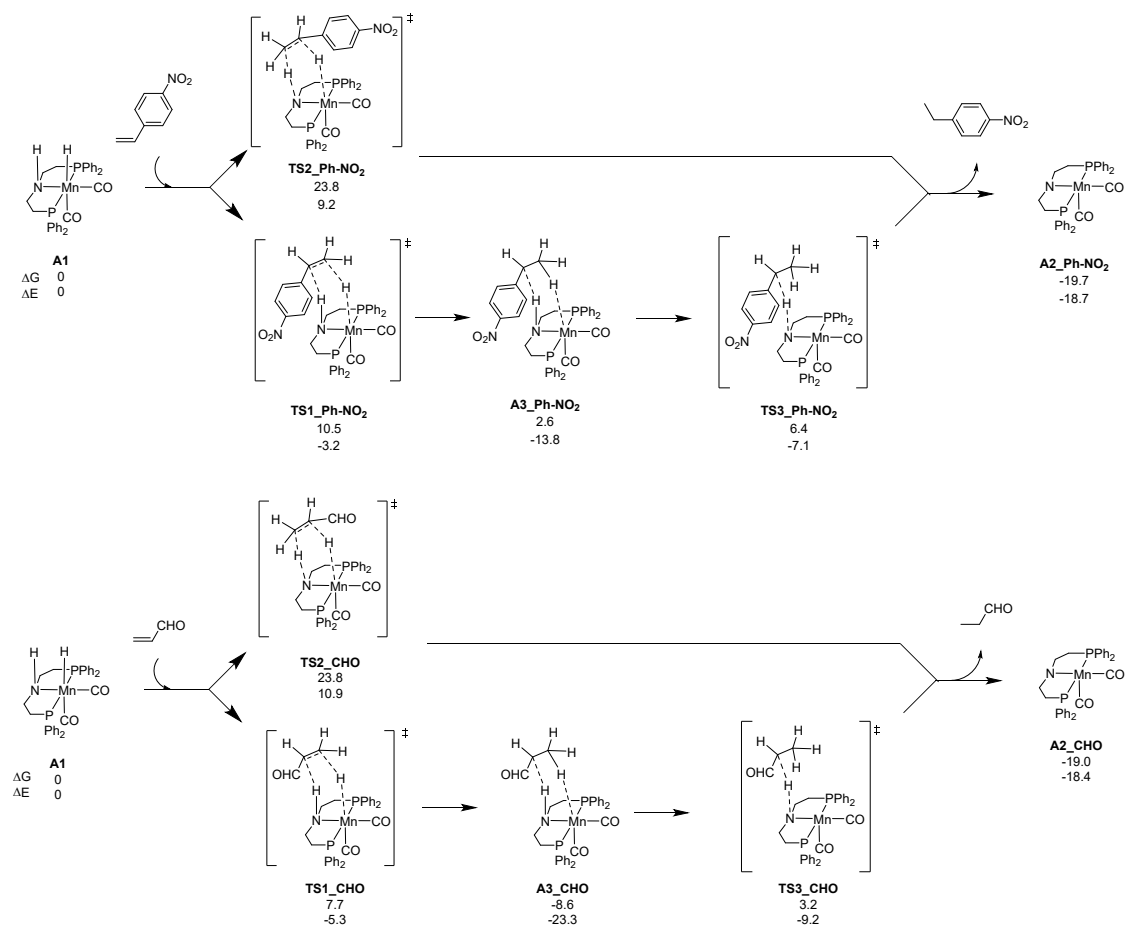

Figure S1. The pathways for the bifunctional outer-sphere C=C hydrogenations by the Mn pincer complex **A1**.

The pathway for catalytic bifunctional hydrogenation of ethylene is shown in Figure S1. Through the transition state **TS1\_H**, the hydride and hydrogen in **A1** move to the C=C bond in a concerted manner. The energy barrier for the step is 23.4 kcal/mol. The optimized geometric structure of **TS1\_H** is shown in Figure 2 in the main text, indicating no elongation of the N-H bond in Mn pincer complex (1.069 Å). The generated complex **A2\_H** undergoes the hydrogen addition over the transition state **TS3\_H** with an energy barrier of 16.2 kcal/mol. After that, the catalytic Mn pincer complex **A1** is regenerated.

The pathways for the bifunctional hydrogenations of alkene derivatives with various substituents are shown in Figure S1. The hydrogen activation steps are same with the step via **TS1\_H**, and thus omitted in Figure S1 for clarity. The hydride transfer through the transition states **TS2** will generate the instable anionic RCH<sub>2</sub>CH<sub>2</sub><sup>-</sup> moiety,

which will abstract the amine proton spontaneously. Therefore, the bifunctional outer-sphere C=C hydrogenations through **TS2** is mediated in a concerted manner. In contrast, the hydride transfer through the transition state **TS1** will generate the anionic RCH<sup>-</sup>CH<sub>3</sub> moiety. For -NH<sub>2</sub>, -OH, -CH<sub>3</sub>, -F, -SH substituents, the anionic RCH<sup>-</sup>CH<sub>3</sub> moiety are destabilized by the “push” effect, and concerted manners are predicted. For -Ph-OCH<sub>3</sub>, -CH=CH<sub>2</sub>, -Ph, -C≡CH, -Ph-NO<sub>2</sub> and -CHO substituents, the RCH<sup>-</sup>CH<sub>3</sub> moiety are stabilized by the “pull” effects, and stepwise manners are predicted.



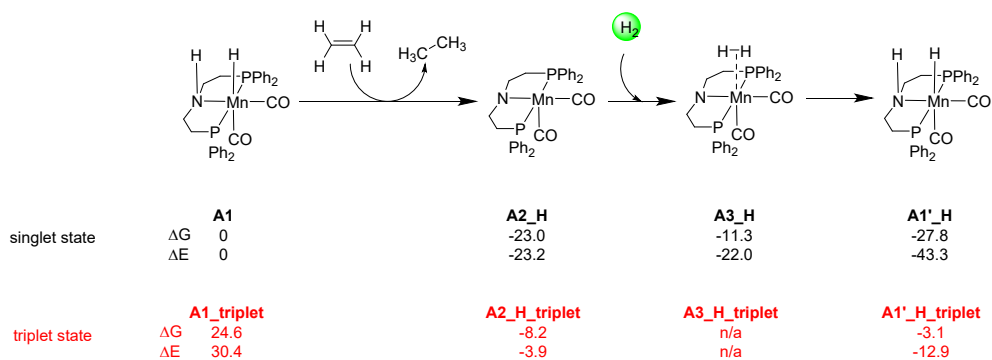

Figure S2. The comparisons between triplet states and singlet states of Mn pincer complexes in the outer-sphere C=C hydrogenation.

The triplet states and singlet states of Mn pincer complexes involved in the outer-sphere C=C hydrogenation are compared in Figure S2. The energies are relative to the singlet structure **A1**. The n/a denotes the structure **A1\_H\_triplet** cannot be located in the structure optimizations. The energies of Mn pincer complexes in singlet states are lower than those in triplet states, suggesting the Mn pincer complexes have singlet ground states.

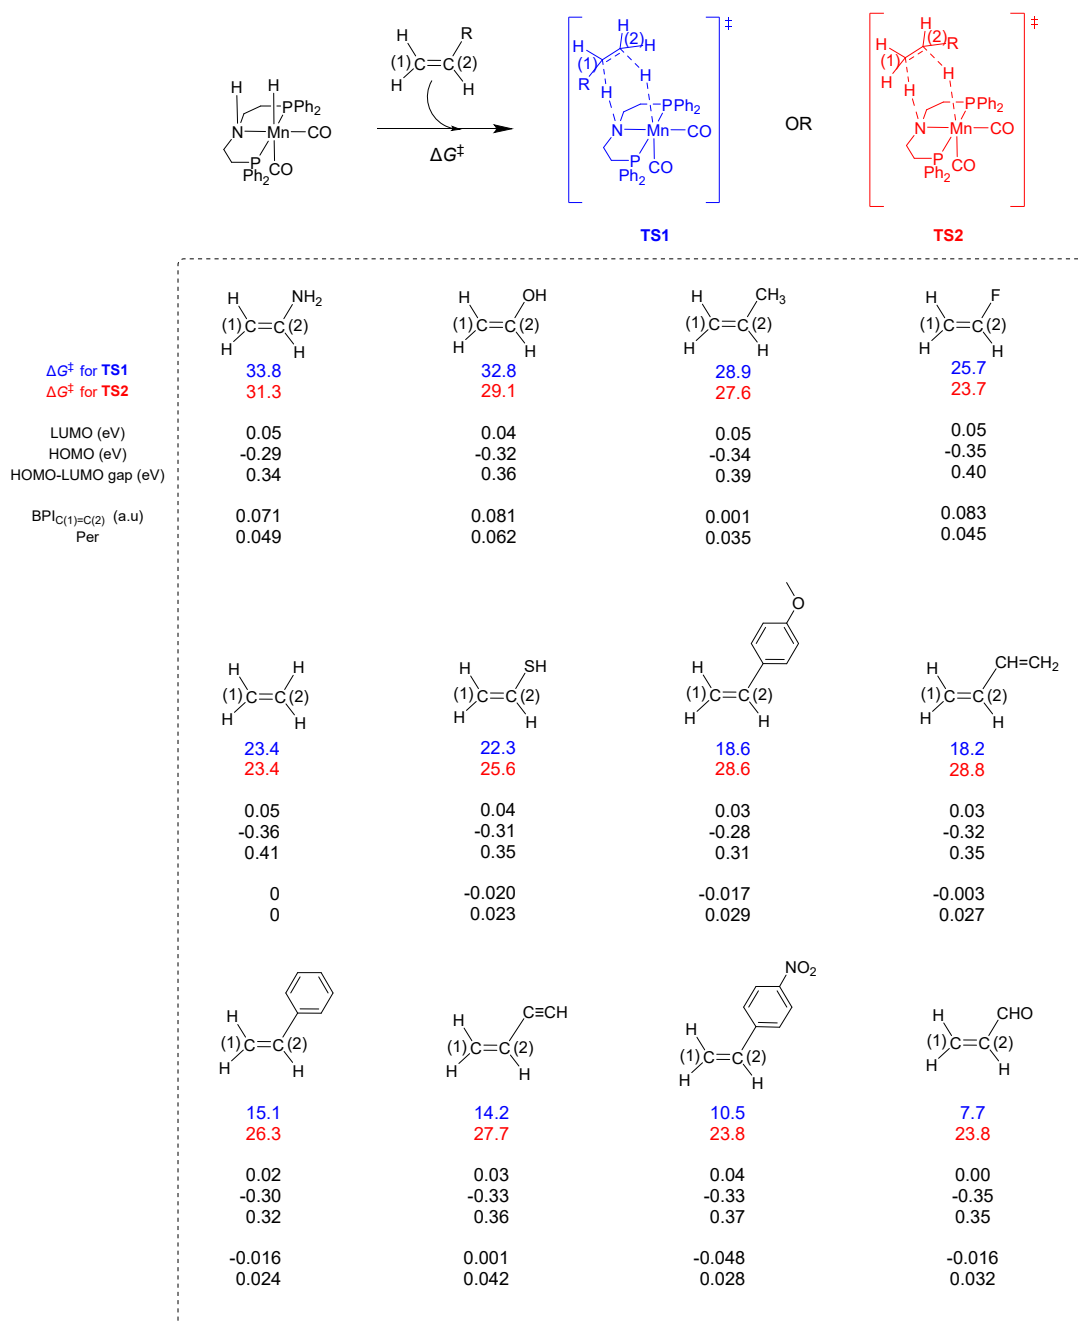

Figure S3. The energy barriers of hydrogen addition processes ( $\Delta G^\ddagger$  in kcal/mol), the LUMO and HOMO energies for alkene derivatives. BPI<sub>C(1)=C(2)</sub> denotes the bond polarity index of C(1)=C(2) bond, and Per denotes the percentage of ionic portion in total NRT bond order.

The BPI between atoms A and B in a molecule is defined as

$$\text{BPI}_{AB} = (\text{EI}_A - \text{EI}_A^{\text{ref}}) - (\text{EI}_B - \text{EI}_B^{\text{ref}})$$

where  $\text{EI}^{\text{ref}}$  is reference EI value derived from calculation of homonuclear species.<sup>1</sup>

$\text{EI}_A$  can be regarded as average energy per valence electron of atom A. The bond polarity index of C(1)=C(2) bonds (BPI<sub>C(1)=C(2)</sub>) is computed with the Multiwfn

software developed by Lu.<sup>2</sup> It is suggested the C(1)=C(2) bonds with -NH<sub>2</sub> and -OH substituents own high values of BPI, while the C(1)=C(2) bonds with -C≡CH and -Ph-NO<sub>2</sub>, -CHO substituents own low values of BPI. This suggests the polarization of C=C bonds is not the controlling factor for the outer-sphere bifunctional C=C bond hydrogenations.

The natural resonance theory (NRT) provides an analysis of molecular electron density in terms of resonance structures and weights.<sup>3</sup> It also measures bond order and valency that are closely related to classical resonance theory concepts. Herein, the NRT bond order is computed using the NBO program, and the bond polarity of C(1)=C(2) bond is measured by percentage of ionic portion in total bond order (Per in Figure S3). It is suggested the C(1)=C(2) bonds with -NH<sub>2</sub> and -OH substituents own high values of Per, while the C(1)=C(2) bonds with -Ph-NO<sub>2</sub> and -CHO substituents own low values of Per. This suggests the polarization of C=C bonds is not the controlling factor for the outer-sphere bifunctional C=C bond hydrogenations.

The asymmetric outer-sphere bifunctional hydrogenation of (1-chlorovinyl)benzene catalyzed by designed Mn complex.

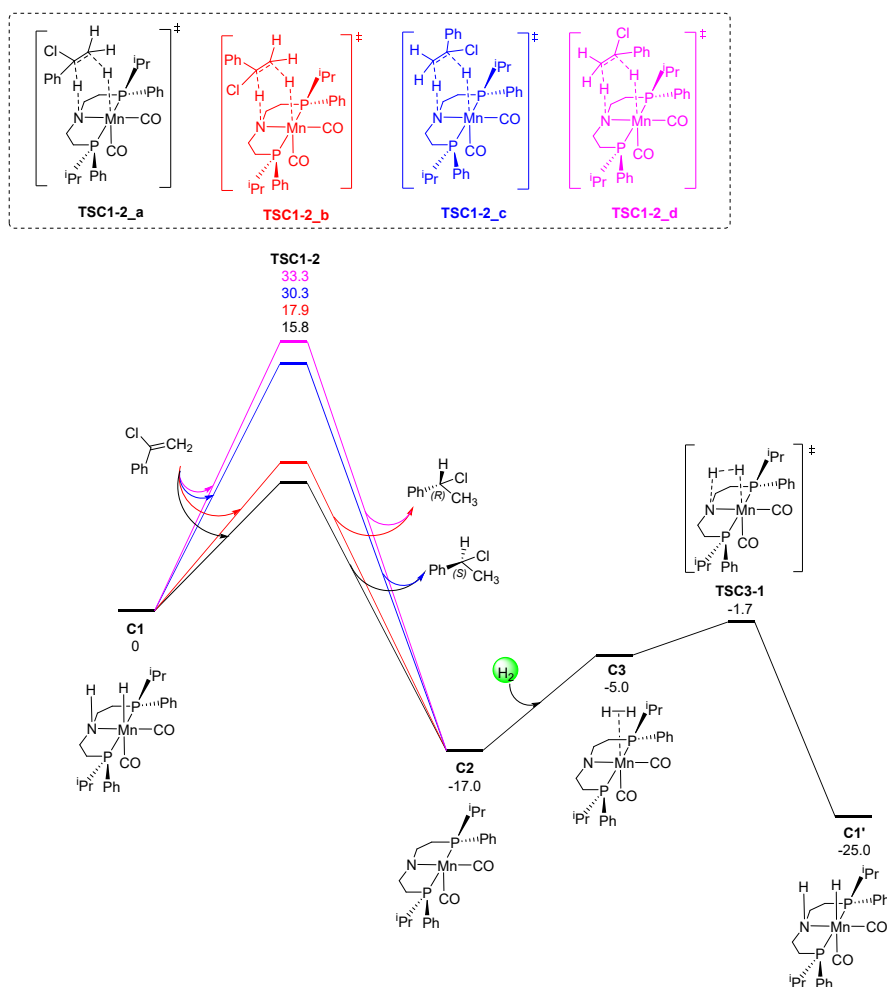

Figure S4. The energy profiles for the asymmetric outer-sphere bifunctional hydrogenation of (1-chlorovinyl)benzene catalyzed by designed Mn complex. The relative Gibbs free energies ( $\Delta G$ ) are in kcal/mol.

The (1-chlorovinyl)benzene molecule is selected as the prochiral alkene model. The energy profiles including four possible pathways are shown in Figure S4. The hydride and hydrogen can transfer to the C=C bond in a stepwise or concerted manner, and the (1-chloroethyl)benzene is produced. The hydride transfer step is the chiral determining step. The pathway via six-membered transition state **TSC1-2\_a** is most favorable with an energy barrier of 15.8 kcal/mol, which is 2.1 kcal/mol lower than that for the second-lowest transition state **TSC1-2\_b**. The generated intermediate **C2** can undergo the hydrogen activation to regenerate the starting species **C1** through the transition state **TSC3-1** with an energy barrier of 15.3 kcal/mol.

**The predicted enantiomeric excess (ee) for alkenes.**

| 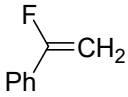 |       |  |       |
|-----------------------------------------------------------------------------------|-------|-----------------------------------------------------------------------------------|-------|
| (1-fluorovinyl)benzene                                                            |       | (1-chlorovinyl)benzene                                                            |       |
| T (°C)                                                                            | ee    | T (°C)                                                                            | ee    |
| 25                                                                                | 97.1% | 25                                                                                | 94.3% |
| 50                                                                                | 96.0% | 50                                                                                | 96.3% |
| 80                                                                                | 94.4% | 80                                                                                | 90.4% |

$$ee = \frac{1 - e^{-\Delta\Delta G^\ddagger/RT}}{1 + e^{-\Delta\Delta G^\ddagger/RT}} * 100$$

Figure S5. The predicted enantiomeric excess (ee) for (1-fluorovinyl)benzene, (1-chlorovinyl)benzene, the corresponding equation. The relative Gibbs free energies ( $\Delta G$ ) are in kcal/mol.

According to the computed Gibbs free energy differences ( $\Delta\Delta G^\ddagger$ ), the enantiomeric excess (ee) are predicted for (1-fluorovinyl)benzene and (1-chlorovinyl)benzene. The results with various temperatures and the corresponding equation<sup>4</sup> are shown in Figure S5.

**Cartesian coordinates of all stationary points optimized at  $\omega$ B97X-D/BS-I level in toluene solvent.**

A1

|    | Coordinates (Angstroms) |              |              |
|----|-------------------------|--------------|--------------|
|    | X                       | Y            | Z            |
| Mn | -0.00005000             | -0.149175000 | 0.182439000  |
| P  | -2.222216000            | 0.053546000  | 0.456359000  |
| O  | 0.000019000             | 0.322610000  | -2.708952000 |
| C  | -0.000015000            | 0.105959000  | -1.573006000 |
| N  | 0.000005000             | -0.084158000 | 2.353889000  |
| C  | -1.235794000            | -0.631581000 | 2.929533000  |
| C  | 1.235812000             | -0.631564000 | 2.929533000  |
| C  | 2.422724000             | 0.091724000  | 2.306008000  |
| C  | -2.422720000            | 0.091693000  | 2.306017000  |
| H  | 3.364995000             | -0.343280000 | 2.640727000  |
| H  | -2.422638000            | 1.141516000  | 2.615561000  |
| H  | 2.422625000             | 1.141549000  | 2.615544000  |
| P  | 2.222210000             | 0.053563000  | 0.456352000  |
| C  | -0.000016000            | -1.937463000 | 0.134962000  |
| O  | 0.000034000             | -3.096038000 | 0.097822000  |
| H  | -3.364981000            | -0.343328000 | 2.640738000  |
| C  | 3.105869000             | 1.575574000  | -0.094814000 |
| C  | 2.638848000             | 2.815135000  | 0.351081000  |
| C  | 4.181116000             | 1.545946000  | -0.982193000 |
| C  | 3.249820000             | 3.992701000  | -0.054644000 |
| H  | 1.771369000             | 2.859069000  | 1.001186000  |
| C  | 4.783961000             | 2.728338000  | -1.402918000 |
| H  | 4.554926000             | 0.601146000  | -1.358896000 |
| C  | 4.326478000             | 3.952611000  | -0.935575000 |
| H  | 2.874612000             | 4.944698000  | 0.305155000  |
| H  | 5.612973000             | 2.686904000  | -2.101083000 |
| H  | 4.797900000             | 4.872750000  | -1.263180000 |
| C  | 3.375963000             | -1.267184000 | -0.101806000 |
| C  | 4.623164000             | -1.481859000 | 0.491405000  |
| C  | 3.011690000             | -2.048267000 | -1.198092000 |
| C  | 5.476806000             | -2.465564000 | 0.009928000  |
| H  | 4.949221000             | -0.866841000 | 1.323448000  |
| C  | 3.869141000             | -3.027884000 | -1.687816000 |
| H  | 2.050467000             | -1.889222000 | -1.673132000 |
| C  | 5.100275000             | -3.241859000 | -1.081842000 |
| H  | 6.440221000             | -2.621744000 | 0.482983000  |
| H  | 3.569539000             | -3.625993000 | -2.541261000 |
| H  | 5.768028000             | -4.008863000 | -1.458870000 |
| C  | -3.105880000            | 1.575562000  | -0.094790000 |
| C  | -4.181124000            | 1.545940000  | -0.982172000 |
| C  | -2.638866000            | 2.815119000  | 0.351122000  |
| C  | -4.783975000            | 2.728333000  | -1.402884000 |
| H  | -4.554929000            | 0.601143000  | -1.358889000 |
| C  | -3.249843000            | 3.992687000  | -0.054589000 |
| H  | -1.771390000            | 2.859049000  | 1.001231000  |
| C  | -4.326499000            | 3.952603000  | -0.935523000 |
| H  | -5.612984000            | 2.686904000  | -2.101052000 |
| H  | -2.874642000            | 4.944681000  | 0.305224000  |
| H  | -4.797926000            | 4.872744000  | -1.263117000 |
| C  | -3.375963000            | -1.267197000 | -0.101816000 |
| C  | -4.623188000            | -1.481854000 | 0.491350000  |
| C  | -3.011654000            | -2.048299000 | -1.198077000 |
| C  | -5.476822000            | -2.465556000 | 0.009852000  |
| H  | -4.949274000            | -0.866823000 | 1.323372000  |
| C  | -3.869096000            | -3.027915000 | -1.687822000 |
| H  | -2.050407000            | -1.889275000 | -1.673077000 |
| C  | -5.100256000            | -3.241869000 | -1.081893000 |
| H  | -6.440257000            | -2.621720000 | 0.482871000  |
| H  | -3.569465000            | -3.626040000 | -2.541246000 |
| H  | -5.768002000            | -4.008872000 | -1.458937000 |
| H  | 1.248358000             | -0.516649000 | 4.021596000  |
| H  | 1.270277000             | -1.700823000 | 2.702047000  |
| H  | -1.270246000            | -1.700840000 | 2.702044000  |
| H  | -1.248338000            | -0.516670000 | 4.021596000  |
| H  | -0.000001000            | 0.916807000  | 2.531007000  |
| H  | -0.000020000            | 1.453222000  | 0.285464000  |

---

**A1\_triplet**

---

|    | Coordinates (Angstroms) |              |              |
|----|-------------------------|--------------|--------------|
|    | X                       | Y            | Z            |
| Mn | -0.000239000            | 0.182733000  | -0.185629000 |
| P  | -2.287924000            | 0.140310000  | 0.480403000  |
| O  | -0.004627000            | 1.562323000  | -2.927231000 |
| C  | -0.002948000            | 0.946861000  | -1.962932000 |
| N  | 0.000435000             | -0.096081000 | 2.553577000  |
| C  | -1.237515000            | -0.757719000 | 2.914300000  |
| C  | 1.241945000             | -0.750503000 | 2.915243000  |
| C  | 2.403399000             | 0.046375000  | 2.321472000  |
| C  | -2.403317000            | 0.034389000  | 2.322678000  |
| H  | 3.372428000             | -0.346108000 | 2.639508000  |
| H  | -2.358082000            | 1.068805000  | 2.679357000  |
| H  | 2.351803000             | 1.081888000  | 2.674043000  |
| P  | 2.287845000             | 0.144214000  | 0.478931000  |
| C  | 0.000481000             | -1.615719000 | -0.379315000 |
| O  | 0.000807000             | -2.769945000 | -0.478934000 |
| H  | -3.370116000            | -0.365068000 | 2.638762000  |
| C  | 3.436941000             | 1.526138000  | 0.093883000  |
| C  | 2.919882000             | 2.740319000  | -0.354817000 |
| C  | 4.818789000             | 1.391210000  | 0.256876000  |
| C  | 3.770236000             | 3.807224000  | -0.630707000 |
| H  | 1.847885000             | 2.843876000  | -0.484585000 |
| C  | 5.665545000             | 2.457016000  | -0.015502000 |
| H  | 5.237576000             | 0.445513000  | 0.586121000  |
| C  | 5.141642000             | 3.667566000  | -0.460983000 |
| H  | 3.357450000             | 4.745339000  | -0.985409000 |
| H  | 6.736095000             | 2.341171000  | 0.114016000  |
| H  | 5.804961000             | 4.497162000  | -0.680899000 |
| C  | 3.237829000             | -1.299464000 | -0.140003000 |
| C  | 3.697698000             | -2.335575000 | 0.669614000  |
| C  | 3.426153000             | -1.388866000 | -1.522827000 |
| C  | 4.345860000             | -3.433870000 | 0.110772000  |
| H  | 3.550543000             | -2.305006000 | 1.743155000  |
| C  | 4.079099000             | -2.478472000 | -2.078899000 |
| H  | 3.055167000             | -0.598892000 | -2.169532000 |
| C  | 4.541481000             | -3.506207000 | -1.261343000 |
| H  | 4.695150000             | -4.234436000 | 0.753865000  |
| H  | 4.220442000             | -2.532180000 | -3.152730000 |
| H  | 5.044085000             | -4.363197000 | -1.695955000 |
| C  | -3.439090000            | 1.522257000  | 0.101764000  |
| C  | -4.820282000            | 1.385770000  | 0.269180000  |
| C  | -2.924572000            | 2.737708000  | -0.346311000 |
| C  | -5.668927000            | 2.451252000  | 0.001612000  |
| H  | -5.237102000            | 0.439085000  | 0.598119000  |
| C  | -3.776860000            | 3.804337000  | -0.617428000 |
| H  | -1.853065000            | 2.842479000  | -0.479173000 |
| C  | -5.147550000            | 3.663091000  | -0.443430000 |
| H  | -6.738941000            | 2.334236000  | 0.134457000  |
| H  | -3.366111000            | 4.743517000  | -0.971681000 |
| H  | -5.812357000            | 4.492487000  | -0.659578000 |
| C  | -3.236100000            | -1.301478000 | -0.145499000 |
| C  | -3.684120000            | -2.347884000 | 0.657498000  |
| C  | -3.433558000            | -1.379110000 | -1.527784000 |
| C  | -4.329823000            | -3.444683000 | 0.092916000  |
| H  | -3.529584000            | -2.326744000 | 1.730238000  |
| C  | -4.083830000            | -2.467425000 | -2.089485000 |
| H  | -3.072197000            | -0.580804000 | -2.169672000 |
| C  | -4.534456000            | -3.505497000 | -1.278459000 |
| H  | -4.670005000            | -4.253265000 | 0.730840000  |
| H  | -4.232254000            | -2.511835000 | -3.162801000 |
| H  | -5.035077000            | -4.361362000 | -1.717551000 |
| H  | 1.380725000             | -0.845581000 | 4.004099000  |
| H  | 1.222417000             | -1.764922000 | 2.501583000  |
| H  | -1.212752000            | -1.771178000 | 2.498575000  |
| H  | -1.375535000            | -0.855679000 | 4.003004000  |
| H  | -0.002411000            | 0.864454000  | 2.878879000  |
| H  | -0.000634000            | 1.759381000  | 0.213443000  |

---

## A2\_H

|    | Coordinates (Angstroms) |              |              |
|----|-------------------------|--------------|--------------|
|    | X                       | Y            | Z            |
| Mn | 0.000006000             | 0.075396000  | 0.249149000  |
| P  | -2.261115000            | 0.104810000  | 0.512820000  |
| O  | 0.000009000             | 1.674243000  | -2.224040000 |
| C  | -0.000032000            | 1.059314000  | -1.244868000 |
| N  | 0.000046000             | -0.187524000 | 2.142950000  |
| C  | -1.190937000            | -0.549450000 | 2.910197000  |
| C  | 1.191057000             | -0.549478000 | 2.910141000  |
| C  | 2.422188000             | 0.141105000  | 2.340246000  |
| C  | -2.422076000            | 0.141162000  | 2.340355000  |
| H  | 3.365679000             | -0.272390000 | 2.704796000  |
| H  | -2.397497000            | 1.202611000  | 2.603733000  |
| H  | 2.397656000             | 1.202550000  | 2.603641000  |
| P  | 2.261137000             | 0.104789000  | 0.512716000  |
| C  | -0.000025000            | -1.400629000 | -0.725676000 |
| O  | 0.000035000             | -2.400189000 | -1.300793000 |
| H  | -3.365563000            | -0.272296000 | 2.704960000  |
| C  | 3.308888000             | 1.511419000  | -0.025198000 |
| C  | 2.714918000             | 2.768615000  | -0.144742000 |
| C  | 4.681440000             | 1.384588000  | -0.246149000 |
| C  | 3.477802000             | 3.881023000  | -0.478984000 |
| H  | 1.648352000             | 2.878113000  | 0.023530000  |
| C  | 5.443147000             | 2.496689000  | -0.584502000 |
| H  | 5.159199000             | 0.414736000  | -0.159296000 |
| C  | 4.843117000             | 3.745660000  | -0.702024000 |
| H  | 3.003068000             | 4.851247000  | -0.574286000 |
| H  | 6.507986000             | 2.385471000  | -0.757525000 |
| H  | 5.438450000             | 4.611744000  | -0.970064000 |
| C  | 3.173702000             | -1.359822000 | -0.092458000 |
| C  | 3.640086000             | -2.365101000 | 0.752085000  |
| C  | 3.326689000             | -1.507176000 | -1.474284000 |
| C  | 4.261972000             | -3.493381000 | 0.225030000  |
| H  | 3.517981000             | -2.282263000 | 1.825907000  |
| C  | 3.955150000             | -2.627030000 | -1.997718000 |
| H  | 2.948501000             | -0.741065000 | -2.144831000 |
| C  | 4.425062000             | -3.624012000 | -1.147397000 |
| H  | 4.618203000             | -4.270164000 | 0.892789000  |
| H  | 4.071401000             | -2.727985000 | -3.070999000 |
| H  | 4.909590000             | -4.503440000 | -1.557022000 |
| C  | -3.308874000            | 1.511441000  | -0.025075000 |
| C  | -4.681423000            | 1.384607000  | -0.246040000 |
| C  | -2.714908000            | 2.768640000  | -0.144599000 |
| C  | -5.443132000            | 2.496708000  | -0.584386000 |
| H  | -5.159179000            | 0.414750000  | -0.159204000 |
| C  | -3.477793000            | 3.881049000  | -0.478834000 |
| H  | -1.648343000            | 2.878140000  | 0.023680000  |
| C  | -4.843106000            | 3.745683000  | -0.701887000 |
| H  | -6.507969000            | 2.385488000  | -0.757421000 |
| H  | -3.003062000            | 4.851276000  | -0.574120000 |
| H  | -5.438441000            | 4.611768000  | -0.969922000 |
| C  | -3.173725000            | -1.359803000 | -0.092281000 |
| C  | -3.640155000            | -2.365022000 | 0.752308000  |
| C  | -3.326722000            | -1.507210000 | -1.474100000 |
| C  | -4.262093000            | -3.493298000 | 0.225304000  |
| H  | -3.518045000            | -2.282141000 | 1.826126000  |
| C  | -3.955236000            | -2.627058000 | -1.997483000 |
| H  | -2.948500000            | -0.741145000 | -2.144681000 |
| C  | -4.425191000            | -3.623981000 | -1.147117000 |
| H  | -4.618358000            | -4.270035000 | 0.893097000  |
| H  | -4.071494000            | -2.728054000 | -3.070759000 |
| H  | -4.909760000            | -4.503405000 | -1.556703000 |
| H  | 1.073371000             | -0.254309000 | 3.963229000  |
| H  | 1.337595000             | -1.642568000 | 2.912539000  |
| H  | -1.337502000            | -1.642536000 | 2.912603000  |
| H  | -1.073197000            | -0.254282000 | 3.963279000  |

## A2\_H\_triplet

|  | Coordinates (Angstroms) |   |   |
|--|-------------------------|---|---|
|  | X                       | Y | Z |



|    |              |              |              |
|----|--------------|--------------|--------------|
| Mn | 0.000026000  | -0.310811000 | 0.162882000  |
| P  | -2.272482000 | 0.159514000  | 0.548411000  |
| O  | 0.000375000  | 0.580978000  | -2.668742000 |
| C  | 0.000196000  | 0.234412000  | -1.561502000 |
| N  | -0.000035000 | -0.394108000 | 2.153114000  |
| C  | -1.203785000 | -0.790994000 | 2.852523000  |
| C  | 1.203551000  | -0.791653000 | 2.852434000  |
| C  | 2.375115000  | 0.075823000  | 2.378806000  |
| C  | -2.374976000 | 0.076848000  | 2.378671000  |
| H  | 3.348982000  | -0.265614000 | 2.739739000  |
| H  | -2.222130000 | 1.102578000  | 2.725841000  |
| H  | 2.222750000  | 1.101497000  | 2.726352000  |
| P  | 2.272600000  | 0.159165000  | 0.548567000  |
| C  | -0.000024000 | -2.134525000 | -0.518390000 |
| O  | -0.000051000 | -3.172615000 | -0.990459000 |
| H  | -3.348979000 | -0.264007000 | 2.739783000  |
| C  | 3.171824000  | 1.673338000  | 0.065222000  |
| C  | 2.448733000  | 2.758402000  | -0.426917000 |
| C  | 4.556401000  | 1.782377000  | 0.217100000  |
| C  | 3.098772000  | 3.943117000  | -0.757243000 |
| H  | 1.374933000  | 2.669918000  | -0.555038000 |
| C  | 5.203710000  | 2.965166000  | -0.112189000 |
| H  | 5.130319000  | 0.938127000  | 0.585727000  |
| C  | 4.474858000  | 4.047246000  | -0.598891000 |
| H  | 2.529810000  | 4.781695000  | -1.143103000 |
| H  | 6.278384000  | 3.044749000  | 0.009190000  |
| H  | 4.982829000  | 4.969922000  | -0.857536000 |
| C  | 3.317724000  | -1.194554000 | -0.104136000 |
| C  | 3.789710000  | -2.236698000 | 0.692316000  |
| C  | 3.553083000  | -1.232326000 | -1.482526000 |
| C  | 4.496211000  | -3.292441000 | 0.122739000  |
| H  | 3.606359000  | -2.239775000 | 1.760278000  |
| C  | 4.264930000  | -2.280320000 | -2.046634000 |
| H  | 3.177402000  | -0.436282000 | -2.118068000 |
| C  | 4.737133000  | -3.315560000 | -1.244085000 |
| H  | 4.855575000  | -4.098317000 | 0.753319000  |
| H  | 4.444082000  | -2.294993000 | -3.116013000 |
| H  | 5.285311000  | -4.139908000 | -1.686643000 |
| C  | -3.171650000 | 1.673556000  | 0.064531000  |
| C  | -4.556237000 | 1.782644000  | 0.216280000  |
| C  | -2.448530000 | 2.758461000  | -0.427917000 |
| C  | -5.203527000 | 2.965326000  | -0.113431000 |
| H  | -5.130181000 | 0.938507000  | 0.585125000  |
| C  | -3.098550000 | 3.943068000  | -0.758668000 |
| H  | -1.374724000 | 2.669940000  | -0.555958000 |
| C  | -4.474646000 | 4.047250000  | -0.600435000 |
| H  | -6.278209000 | 3.044944000  | 0.007850000  |
| H  | -2.529566000 | 4.781519000  | -1.144771000 |
| H  | -4.982601000 | 4.969840000  | -0.859416000 |
| C  | -3.317761000 | -1.194364000 | -0.103731000 |
| C  | -3.790569000 | -2.235697000 | 0.693291000  |
| C  | -3.552582000 | -1.233023000 | -1.482187000 |
| C  | -4.497319000 | -3.291530000 | 0.124191000  |
| H  | -3.607659000 | -2.238045000 | 1.761329000  |
| C  | -4.264687000 | -2.281092000 | -2.045827000 |
| H  | -3.176289000 | -0.437604000 | -2.118150000 |
| C  | -4.737691000 | -3.315530000 | -1.242713000 |
| H  | -4.857314000 | -4.096777000 | 0.755215000  |
| H  | -4.443425000 | -2.296468000 | -3.115264000 |
| H  | -5.286074000 | -4.139943000 | -1.684894000 |
| H  | 1.087464000  | -0.651824000 | 3.938878000  |
| H  | 1.455250000  | -1.860937000 | 2.708976000  |
| H  | -1.455935000 | -1.860207000 | 2.709323000  |
| H  | -1.087640000 | -0.650947000 | 3.938934000  |

### A3\_H

|    | Coordinates (Angstroms) |              |              |
|----|-------------------------|--------------|--------------|
|    | X                       | Y            | Z            |
| Mn | -0.001761000            | 0.155148000  | 0.230824000  |
| P  | -2.260281000            | 0.136561000  | 0.534178000  |
| O  | 0.047723000             | 0.619333000  | -2.673596000 |
| C  | 0.022235000             | 0.468310000  | -1.527858000 |
| N  | -0.002110000            | -0.097973000 | 2.308703000  |

|   |              |              |              |
|---|--------------|--------------|--------------|
| C | -1.184023000 | -0.709101000 | 2.870902000  |
| C | 1.184287000  | -0.697086000 | 2.875003000  |
| C | 2.425883000  | 0.029885000  | 2.363794000  |
| C | -2.431043000 | 0.008141000  | 2.359528000  |
| H | 3.363634000  | -0.435207000 | 2.677373000  |
| H | -2.432086000 | 1.037401000  | 2.730622000  |
| H | 2.418438000  | 1.060662000  | 2.730763000  |
| P | 2.255872000  | 0.151545000  | 0.538022000  |
| C | 0.005268000  | -1.613344000 | -0.045516000 |
| O | 0.006038000  | -2.750469000 | -0.200214000 |
| H | -3.362973000 | -0.468329000 | 2.673039000  |
| C | 3.316877000  | 1.569942000  | 0.063420000  |
| C | 2.770703000  | 2.663311000  | -0.604782000 |
| C | 4.679648000  | 1.574220000  | 0.375797000  |
| C | 3.568996000  | 3.749977000  | -0.950794000 |
| H | 1.718090000  | 2.666116000  | -0.863311000 |
| C | 5.475164000  | 2.658370000  | 0.033960000  |
| H | 5.122915000  | 0.720517000  | 0.878795000  |
| C | 4.919765000  | 3.749253000  | -0.629951000 |
| H | 3.132854000  | 4.594526000  | -1.472734000 |
| H | 6.531503000  | 2.651618000  | 0.279354000  |
| H | 5.543246000  | 4.594561000  | -0.900163000 |
| C | 3.177970000  | -1.258560000 | -0.181454000 |
| C | 3.553139000  | -2.372300000 | 0.566870000  |
| C | 3.430787000  | -1.246566000 | -1.555940000 |
| C | 4.182198000  | -3.451668000 | -0.046545000 |
| H | 3.350129000  | -2.415060000 | 1.630793000  |
| C | 4.061184000  | -2.321467000 | -2.165445000 |
| H | 3.136655000  | -0.389524000 | -2.154060000 |
| C | 4.438850000  | -3.428262000 | -1.410722000 |
| H | 4.467103000  | -4.314025000 | 0.546255000  |
| H | 4.253647000  | -2.297426000 | -3.232387000 |
| H | 4.926710000  | -4.271316000 | -1.887416000 |
| C | -3.316587000 | 1.559868000  | 0.062045000  |
| C | -4.605010000 | 1.695286000  | 0.586966000  |
| C | -2.846937000 | 2.515365000  | -0.836494000 |
| C | -5.401231000 | 2.773109000  | 0.226367000  |
| H | -4.989676000 | 0.952891000  | 1.278918000  |
| C | -3.648901000 | 3.591237000  | -1.206570000 |
| H | -1.852495000 | 2.418344000  | -1.257120000 |
| C | -4.923936000 | 3.722857000  | -0.672984000 |
| H | -6.397028000 | 2.872145000  | 0.644311000  |
| H | -3.274540000 | 4.325150000  | -1.911685000 |
| H | -5.548667000 | 4.562453000  | -0.957621000 |
| C | -3.184769000 | -1.269648000 | -0.191569000 |
| C | -3.551439000 | -2.389838000 | 0.551495000  |
| C | -3.446204000 | -1.249055000 | -1.564132000 |
| C | -4.180823000 | -3.466931000 | -0.065367000 |
| H | -3.340952000 | -2.439665000 | 1.613700000  |
| C | -4.076859000 | -2.321969000 | -2.177090000 |
| H | -3.157958000 | -0.387669000 | -2.158899000 |
| C | -4.446151000 | -3.435093000 | -1.427785000 |
| H | -4.458895000 | -4.334466000 | 0.523118000  |
| H | -4.275883000 | -2.291201000 | -3.242667000 |
| H | -4.934137000 | -4.276538000 | -1.907180000 |
| H | 1.169207000  | -0.631142000 | 3.976456000  |
| H | 1.274199000  | -1.780307000 | 2.641280000  |
| H | -1.263842000 | -1.792690000 | 2.634921000  |
| H | -1.172268000 | -0.645556000 | 3.972551000  |
| H | 0.038744000  | 1.711507000  | 1.087110000  |
| H | -0.105098000 | 1.947394000  | 0.350924000  |

**B1**

|    | Coordinates (Angstroms) |              |              |
|----|-------------------------|--------------|--------------|
|    | X                       | Y            | Z            |
| Mn | 0.069690000             | -0.111767000 | 0.058343000  |
| P  | -1.967616000            | 0.671945000  | 0.626179000  |
| O  | 0.183533000             | 0.938102000  | -2.671160000 |
| C  | 0.127807000             | 0.517024000  | -1.592259000 |
| N  | 0.127208000             | -0.650656000 | 2.173051000  |
| C  | -1.205328000            | -0.959460000 | 2.707570000  |
| C  | 1.146825000             | -1.662920000 | 2.482617000  |
| C  | 2.489325000             | -1.177760000 | 1.947702000  |

|   |              |              |              |
|---|--------------|--------------|--------------|
| C | -2.129059000 | 0.216503000  | 2.419433000  |
| H | 3.263144000  | -1.940407000 | 2.062954000  |
| H | -1.802706000 | 1.088598000  | 2.997242000  |
| H | 2.812129000  | -0.293873000 | 2.506604000  |
| P | 2.252035000  | -0.658865000 | 0.178857000  |
| C | -0.554745000 | -1.696119000 | -0.473872000 |
| O | -1.010050000 | -2.688937000 | -0.866291000 |
| H | -3.150480000 | -0.008750000 | 2.727072000  |
| C | 3.566749000  | 0.610132000  | -0.051997000 |
| C | 4.882943000  | 0.367552000  | 0.353988000  |
| C | 3.265350000  | 1.829121000  | -0.656259000 |
| C | 5.872856000  | 1.322493000  | 0.161839000  |
| H | 5.142466000  | -0.572812000 | 0.831264000  |
| C | 4.258425000  | 2.781939000  | -0.861852000 |
| H | 2.243397000  | 2.037091000  | -0.949047000 |
| C | 5.562066000  | 2.531838000  | -0.452823000 |
| H | 6.887704000  | 1.122982000  | 0.488810000  |
| H | 4.008933000  | 3.723292000  | -1.339252000 |
| H | 6.334744000  | 3.277042000  | -0.608326000 |
| C | -3.476003000 | 0.005617000  | -0.195788000 |
| C | -4.699230000 | -0.193214000 | 0.448749000  |
| C | -3.392832000 | -0.273045000 | -1.562306000 |
| C | -5.804920000 | -0.662606000 | -0.250940000 |
| H | -4.807759000 | 0.021453000  | 1.505639000  |
| C | -4.499836000 | -0.730133000 | -2.266838000 |
| H | -2.449390000 | -0.141748000 | -2.079629000 |
| C | -5.708730000 | -0.929673000 | -1.611787000 |
| H | -6.744866000 | -0.816293000 | 0.268173000  |
| H | -4.411068000 | -0.939835000 | -3.327047000 |
| H | -6.571730000 | -1.296055000 | -2.156988000 |
| H | 1.205453000  | -1.844929000 | 3.564091000  |
| H | 0.846747000  | -2.596725000 | 1.998848000  |
| H | -1.566314000 | -1.865098000 | 2.211502000  |
| H | -1.161035000 | -1.158467000 | 3.786796000  |
| H | 0.430398000  | 0.225005000  | 2.591520000  |
| H | 0.551066000  | 1.344482000  | 0.569308000  |
| C | -2.290806000 | 2.504637000  | 0.645916000  |
| H | -1.474298000 | 2.874723000  | 1.276577000  |
| C | 2.989351000  | -2.061094000 | -0.807461000 |
| H | 4.066759000  | -2.042559000 | -0.609336000 |
| C | 2.760605000  | -1.799656000 | -2.296352000 |
| H | 3.263067000  | -2.565196000 | -2.896192000 |
| H | 1.693848000  | -1.829547000 | -2.537126000 |
| H | 3.149997000  | -0.825086000 | -2.604848000 |
| C | 2.448975000  | -3.428439000 | -0.391905000 |
| H | 2.933499000  | -4.209495000 | -0.986810000 |
| H | 2.648333000  | -3.651394000 | 0.659738000  |
| H | 1.373804000  | -3.508729000 | -0.562263000 |
| C | -3.629508000 | 2.908223000  | 1.261669000  |
| H | -3.677847000 | 3.997275000  | 1.363936000  |
| H | -4.465941000 | 2.600014000  | 0.627944000  |
| H | -3.781022000 | 2.479296000  | 2.256713000  |
| C | -2.119423000 | 3.096539000  | -0.751474000 |
| H | -2.272027000 | 4.180110000  | -0.718794000 |
| H | -1.119477000 | 2.907905000  | -1.145776000 |
| H | -2.851536000 | 2.682071000  | -1.452552000 |

## C1

|    | Coordinates (Angstroms) |              |              |
|----|-------------------------|--------------|--------------|
|    | X                       | Y            | Z            |
| Mn | 0.069690000             | -0.111767000 | 0.058343000  |
| P  | -1.967616000            | 0.671945000  | 0.626179000  |
| O  | 0.183533000             | 0.938102000  | -2.671160000 |
| C  | 0.127807000             | 0.517024000  | -1.592259000 |
| N  | 0.127208000             | -0.650656000 | 2.173051000  |
| C  | -1.205328000            | -0.959460000 | 2.707570000  |
| C  | 1.146825000             | -1.662920000 | 2.482617000  |
| C  | 2.489325000             | -1.177776000 | 1.947702000  |
| C  | -2.129059000            | 0.216503000  | 2.419433000  |
| H  | 3.263144000             | -1.940407000 | 2.062954000  |
| H  | -1.802706000            | 1.088598000  | 2.997242000  |
| H  | 2.812129000             | -0.293873000 | 2.506604000  |
| P  | 2.252035000             | -0.658865000 | 0.178857000  |

|   |              |              |              |
|---|--------------|--------------|--------------|
| C | -0.554745000 | -1.696119000 | -0.473872000 |
| O | -1.010050000 | -2.688937000 | -0.866291000 |
| H | -3.150480000 | -0.008750000 | 2.727072000  |
| C | 3.566749000  | 0.610132000  | -0.051997000 |
| C | 4.882943000  | 0.367552000  | 0.353988000  |
| C | 3.265350000  | 1.829121000  | -0.656259000 |
| C | 5.872856000  | 1.322493000  | 0.161839000  |
| H | 5.142466000  | -0.572812000 | 0.831264000  |
| C | 4.258425000  | 2.781939000  | -0.861852000 |
| H | 2.243397000  | 2.037091000  | -0.949047000 |
| C | 5.562066000  | 2.531838000  | -0.452823000 |
| H | 6.887704000  | 1.122982000  | 0.488810000  |
| H | 4.008933000  | 3.723292000  | -1.339252000 |
| H | 6.334744000  | 3.277042000  | -0.608326000 |
| C | -3.476003000 | 0.005617000  | -0.195788000 |
| C | -4.699230000 | -0.193214000 | 0.448749000  |
| C | -3.392832000 | -0.273045000 | -1.562306000 |
| C | -5.804920000 | -0.662606000 | -0.250940000 |
| H | -4.807759000 | 0.021453000  | 1.505639000  |
| C | -4.499836000 | -0.730133000 | -2.266838000 |
| H | -2.449390000 | -0.141748000 | -2.079629000 |
| C | -5.708730000 | -0.929673000 | -1.611787000 |
| H | -6.744866000 | -0.816293000 | 0.268173000  |
| H | -4.411068000 | -0.939835000 | -3.327047000 |
| H | -6.571730000 | -1.296055000 | -2.156988000 |
| H | 1.205453000  | -1.844929000 | 3.564091000  |
| H | 0.846747000  | -2.596725000 | 1.998848000  |
| H | -1.566314000 | -1.865098000 | 2.211502000  |
| H | -1.161035000 | -1.158467000 | 3.786796000  |
| H | 0.430398000  | 0.225005000  | 2.591520000  |
| H | 0.551066000  | 1.344482000  | 0.569308000  |
| C | -2.290806000 | 2.504637000  | 0.645916000  |
| H | -1.474298000 | 2.874723000  | 1.276577000  |
| C | 2.989351000  | -2.061094000 | -0.807461000 |
| H | 4.066759000  | -2.042559000 | -0.609336000 |
| C | 2.760605000  | -1.799656000 | -2.296352000 |
| H | 3.263067000  | -2.565196000 | -2.896192000 |
| H | 1.693848000  | -1.829547000 | -2.537126000 |
| H | 3.149997000  | -0.825086000 | -2.604848000 |
| C | 2.448975000  | -3.428439000 | -0.391905000 |
| H | 2.933499000  | -4.209495000 | -0.986810000 |
| H | 2.648333000  | -3.651394000 | 0.659738000  |
| H | 1.373804000  | -3.508729000 | -0.562263000 |
| C | -3.629508000 | 2.908223000  | 1.261669000  |
| H | -3.677847000 | 3.997275000  | 1.363936000  |
| H | -4.465941000 | 2.600014000  | 0.627944000  |
| H | -3.781022000 | 2.479296000  | 2.256713000  |
| C | -2.119423000 | 3.096539000  | -0.751474000 |
| H | -2.272027000 | 4.180110000  | -0.718794000 |
| H | -1.119477000 | 2.907905000  | -1.145776000 |
| H | -2.851536000 | 2.682071000  | -1.452552000 |

CI'

|    | Coordinates (Angstroms) |              |              |
|----|-------------------------|--------------|--------------|
|    | X                       | Y            | Z            |
| Mn | 0.069690000             | -0.111767000 | 0.058343000  |
| P  | -1.967616000            | 0.671945000  | 0.626179000  |
| O  | 0.183533000             | 0.938102000  | -2.671160000 |
| C  | 0.127807000             | 0.517024000  | -1.592259000 |
| N  | 0.127208000             | -0.650656000 | 2.173051000  |
| C  | -1.205328000            | -0.959460000 | 2.707570000  |
| C  | 1.146825000             | -1.662920000 | 2.482617000  |
| C  | 2.489325000             | -1.177760000 | 1.947702000  |
| C  | -2.129059000            | 0.216503000  | 2.419433000  |
| H  | 3.263144000             | -1.940407000 | 2.062954000  |
| H  | -1.802706000            | 1.088598000  | 2.997242000  |
| H  | 2.812129000             | -0.293873000 | 2.506604000  |
| P  | 2.252035000             | -0.658865000 | 0.178857000  |
| C  | -0.554745000            | -1.696119000 | -0.473872000 |
| O  | -1.010050000            | -2.688937000 | -0.866291000 |
| H  | -3.150480000            | -0.008750000 | 2.727072000  |
| C  | 3.566749000             | 0.610132000  | -0.051997000 |
| C  | 4.882943000             | 0.367552000  | 0.353988000  |

|   |             |             |             |
|---|-------------|-------------|-------------|
| C | 3.26535000  | 1.82912100  | -0.65625900 |
| C | 5.87285600  | 1.32249300  | 0.16183900  |
| H | 5.14246600  | -0.57281200 | 0.83126400  |
| C | 4.25842500  | 2.78193900  | -0.86185200 |
| H | 2.24339700  | 2.03709100  | -0.94904700 |
| C | 5.56206600  | 2.53183800  | -0.45282300 |
| H | 6.88770400  | 1.12298200  | 0.48881000  |
| H | 4.00893300  | 3.72329200  | -1.33925200 |
| H | 6.33474400  | 3.27704200  | -0.60832600 |
| C | -3.47600300 | 0.00561700  | -0.19578800 |
| C | -4.69923000 | -0.19321400 | 0.44874900  |
| C | -3.39283200 | -0.27304500 | -1.56230600 |
| C | -5.80492000 | -0.66260600 | -0.25094000 |
| H | -4.80775900 | 0.02145300  | 1.50563900  |
| C | -4.49983600 | -0.73013300 | -2.26683800 |
| H | -2.44939000 | -0.14174800 | -2.07962900 |
| C | -5.70873000 | -0.92967300 | -1.61178700 |
| H | -6.74486600 | -0.81629300 | 0.26817300  |
| H | -4.41106800 | -0.93983500 | -3.32704700 |
| H | -6.57173000 | -1.29605500 | -2.15698800 |
| H | 1.20545300  | -1.84492900 | 3.56409100  |
| H | 0.84674700  | -2.59672500 | 1.99884800  |
| H | -1.56631400 | -1.86509800 | 2.21150200  |
| H | -1.16103500 | -1.15846700 | 3.78679600  |
| H | 0.43039800  | 0.22500500  | 2.59152000  |
| H | 0.55106600  | 1.34448200  | 0.56930800  |
| C | -2.29080600 | 2.50463700  | 0.64591600  |
| H | -1.47429800 | 2.87472300  | 1.27657700  |
| C | 2.98935100  | -2.06109400 | -0.80746100 |
| H | 4.06675900  | -2.04255900 | -0.60933600 |
| C | 2.76060500  | -1.79965600 | -2.29635200 |
| H | 3.26306700  | -2.56519600 | -2.89619200 |
| H | 1.69384800  | -1.82954700 | -2.53712600 |
| H | 3.14999700  | -0.82508600 | -2.60484800 |
| C | 2.44897500  | -3.42843900 | -0.39190500 |
| H | 2.93349900  | -4.20949500 | -0.98681000 |
| H | 2.64833300  | -3.65139400 | 0.65973800  |
| H | 1.37380400  | -3.50872900 | -0.56226300 |
| C | -3.62950800 | 2.90822300  | 1.26166900  |
| H | -3.67784700 | 3.99727500  | 1.36393600  |
| H | -4.46594100 | 2.60001400  | 0.62794400  |
| H | -3.78102200 | 2.47929600  | 2.25671300  |
| C | -2.11942300 | 3.09653900  | -0.75147400 |
| H | -2.27202700 | 4.18011000  | -0.71879400 |
| H | -1.11947700 | 2.90790500  | -1.14577600 |
| H | -2.85153600 | 2.68207100  | -1.45255200 |

## B2

|    | Coordinates (Angstroms) |             |             |
|----|-------------------------|-------------|-------------|
|    | X                       | Y           | Z           |
| Mn | 0.09309400              | 0.06951700  | 0.02071000  |
| P  | -2.01508400             | 0.90777800  | 0.30025200  |
| O  | 0.96773900              | 2.31767400  | -1.64560200 |
| C  | 0.63056500              | 1.41609800  | -1.00380600 |
| N  | -0.07741400             | -0.31678200 | 1.88111200  |
| C  | -1.24455900             | 0.00790900  | 2.69866000  |
| C  | 0.80980900              | -1.20583500 | 2.63206200  |
| C  | 2.24221100              | -1.09143500 | 2.12878700  |
| C  | -1.98744300             | 1.19694100  | 2.10524900  |
| H  | 2.86050300              | -1.95309500 | 2.39734600  |
| H  | -1.39415100             | 2.10625200  | 2.24752900  |
| H  | 2.70680400              | -0.19925000 | 2.55549700  |
| P  | 2.18908900              | -0.82621600 | 0.30501500  |
| C  | -0.29378000             | -0.84289600 | -1.44375100 |
| O  | -0.56223700             | -1.45688400 | -2.38923300 |
| H  | -2.96534400             | 1.35803600  | 2.56303300  |
| C  | 3.68342300              | 0.21630900  | 0.04125000  |
| C  | 4.90853100              | -0.26470100 | -0.42345300 |
| C  | 3.58609300              | 1.56715900  | 0.38751100  |
| C  | 6.00234400              | 0.58591200  | -0.54941100 |
| H  | 5.02881000              | -1.30696600 | -0.69311200 |
| C  | 4.67871500              | 2.41522500  | 0.26962300  |
| H  | 2.64379000              | 1.95919500  | 0.75684000  |

|   |              |              |              |
|---|--------------|--------------|--------------|
| C | 5.89089000   | 1.926889000  | -0.205577000 |
| H | 6.944035000  | 0.194649000  | -0.919018000 |
| H | 4.579086000  | 3.460806000  | 0.539479000  |
| H | 6.743494000  | 2.589385000  | -0.307164000 |
| C | -3.455864000 | -0.195842000 | 0.004190000  |
| C | -4.395557000 | -0.500304000 | 0.991475000  |
| C | -3.624924000 | -0.750413000 | -1.268369000 |
| C | -5.473930000 | -1.333599000 | 0.714275000  |
| H | -4.296073000 | -0.093100000 | 1.989875000  |
| C | -4.706956000 | -1.574546000 | -1.549054000 |
| H | -2.905575000 | -0.542983000 | -2.050423000 |
| C | -5.634417000 | -1.870553000 | -0.556702000 |
| H | -6.190423000 | -1.561722000 | 1.495911000  |
| H | -4.819078000 | -1.993356000 | -2.543002000 |
| H | -6.475495000 | -2.520245000 | -0.772761000 |
| H | 0.792703000  | -0.951696000 | 3.701989000  |
| H | 0.460449000  | -2.246972000 | 2.561403000  |
| H | -1.927166000 | -0.854852000 | 2.778131000  |
| H | -0.936288000 | 0.251340000  | 3.726027000  |
| C | -2.535600000 | 2.525476000  | -0.445389000 |
| H | -1.693343000 | 3.184286000  | -0.201127000 |
| C | 2.632786000  | -2.476442000 | -0.417050000 |
| H | 3.606072000  | -2.745901000 | 0.008706000  |
| C | 2.745302000  | -2.427967000 | -1.943137000 |
| H | 3.160573000  | -3.371301000 | -2.312262000 |
| H | 1.766520000  | -2.296198000 | -2.406452000 |
| H | 3.390504000  | -1.619832000 | -2.295336000 |
| C | 1.616121000  | -3.530659000 | 0.029632000  |
| H | 1.846549000  | -4.489611000 | -0.444720000 |
| H | 1.632995000  | -3.685168000 | 1.111281000  |
| H | 0.597496000  | -3.253518000 | -0.256686000 |
| C | -3.811425000 | 3.097177000  | 0.171185000  |
| H | -4.045181000 | 4.063406000  | -0.287115000 |
| H | -4.664004000 | 2.432840000  | -0.001229000 |
| H | -3.713794000 | 3.257204000  | 1.248028000  |
| C | -2.648729000 | 2.432853000  | -1.968043000 |
| H | -2.754098000 | 3.435177000  | -2.393939000 |
| H | -1.769927000 | 1.969310000  | -2.422869000 |
| H | -3.531599000 | 1.857134000  | -2.260674000 |

## C2

|    | Coordinates (Angstroms) |              |              |
|----|-------------------------|--------------|--------------|
|    | X                       | Y            | Z            |
| Mn | 0.093094000             | 0.069517000  | 0.020710000  |
| P  | -2.015084000            | 0.907778000  | 0.300252000  |
| O  | 0.967739000             | 2.317674000  | -1.645602000 |
| C  | 0.630565000             | 1.416098000  | -1.003806000 |
| N  | -0.077414000            | -0.316782000 | 1.881112000  |
| C  | -1.244559000            | 0.007909000  | 2.698660000  |
| C  | 0.809809000             | -1.205835000 | 2.632062000  |
| C  | 2.242211000             | -1.091435000 | 2.128787000  |
| C  | -1.987443000            | 1.196941000  | 2.105249000  |
| H  | 2.860503000             | -1.953095000 | 2.397346000  |
| H  | -1.394151000            | 2.106252000  | 2.247529000  |
| H  | 2.706804000             | -0.199250000 | 2.555497000  |
| P  | 2.189089000             | -0.826216000 | 0.305015000  |
| C  | -0.293780000            | -0.842896000 | -1.443751000 |
| O  | -0.562237000            | -1.456884000 | -2.389233000 |
| H  | -2.965344000            | 1.358036000  | 2.563033000  |
| C  | 3.683423000             | 0.216309000  | 0.041250000  |
| C  | 4.908531000             | -0.264701000 | -0.423453000 |
| C  | 3.586093000             | 1.567159000  | 0.387511000  |
| C  | 6.002344000             | 0.585912000  | -0.549411000 |
| H  | 5.028810000             | -1.306966000 | -0.693112000 |
| C  | 4.678715000             | 2.415225000  | 0.269623000  |
| H  | 2.643790000             | 1.959195000  | 0.756840000  |
| C  | 5.890890000             | 1.926889000  | -0.205577000 |
| H  | 6.944035000             | 0.194649000  | -0.919018000 |
| H  | 4.579086000             | 3.460806000  | 0.539479000  |
| H  | 6.743494000             | 2.589385000  | -0.307164000 |
| C  | -3.455864000            | -0.195842000 | 0.004190000  |
| C  | -4.395557000            | -0.500304000 | 0.991475000  |
| C  | -3.624924000            | -0.750413000 | -1.268369000 |

|   |              |              |              |
|---|--------------|--------------|--------------|
| C | -5.473930000 | -1.333599000 | 0.714275000  |
| H | -4.296073000 | -0.093100000 | 1.989875000  |
| C | -4.706956000 | -1.574546000 | -1.549054000 |
| H | -2.905575000 | -0.542983000 | -2.050423000 |
| C | -5.634417000 | -1.870553000 | -0.556702000 |
| H | -6.190423000 | -1.561722000 | 1.495911000  |
| H | -4.819078000 | -1.993356000 | -2.543002000 |
| H | -6.475495000 | -2.520245000 | -0.772761000 |
| H | 0.792703000  | -0.951696000 | 3.701989000  |
| H | 0.460449000  | -2.246972000 | 2.561403000  |
| H | -1.927166000 | -0.854852000 | 2.778131000  |
| H | -0.936288000 | 0.251340000  | 3.726027000  |
| C | -2.535600000 | 2.525476000  | -0.445389000 |
| H | -1.693343000 | 3.184286000  | -0.201127000 |
| C | 2.632786000  | -2.476442000 | -0.417050000 |
| H | 3.606072000  | -2.745901000 | 0.008706000  |
| C | 2.745302000  | -2.427967000 | -1.943137000 |
| H | 3.160573000  | -3.371301000 | -2.312262000 |
| H | 1.766520000  | -2.296198000 | -2.406452000 |
| H | 3.390504000  | -1.619832000 | -2.295336000 |
| C | 1.616121000  | -3.530659000 | 0.029632000  |
| H | 1.846549000  | -4.489611000 | -0.444720000 |
| H | 1.632995000  | -3.685168000 | 1.111281000  |
| H | 0.597496000  | -3.253518000 | -0.256686000 |
| C | -3.811425000 | 3.097177000  | 0.171185000  |
| H | -4.045181000 | 4.063406000  | -0.287115000 |
| H | -4.664004000 | 2.432840000  | -0.001229000 |
| H | -3.713794000 | 3.257204000  | 1.248028000  |
| C | -2.648729000 | 2.432853000  | -1.968043000 |
| H | -2.754098000 | 3.435177000  | -2.393939000 |
| H | -1.769927000 | 1.969310000  | -2.422869000 |
| H | -3.531599000 | 1.857134000  | -2.260674000 |

### B3

|    | Coordinates (Angstroms) |              |              |
|----|-------------------------|--------------|--------------|
|    | X                       | Y            | Z            |
| Mn | 0.093540000             | -0.029751000 | 0.097025000  |
| O  | 0.114294000             | 0.865291000  | -2.702924000 |
| C  | 0.114576000             | 0.547629000  | -1.589615000 |
| N  | 0.120509000             | -0.630522000 | 2.100775000  |
| C  | -1.167672000            | -0.977439000 | 2.653947000  |
| C  | 1.094739000             | -1.645549000 | 2.432801000  |
| C  | 2.477865000             | -1.207398000 | 1.956976000  |
| H  | 2.789244000             | -0.323364000 | 2.520691000  |
| P  | 2.284975000             | -0.687826000 | 0.200361000  |
| C  | -0.533317000            | -1.615674000 | -0.418640000 |
| O  | -0.983270000            | -2.628124000 | -0.730563000 |
| H  | 1.134519000             | -1.807576000 | 3.523690000  |
| H  | 0.854206000             | -2.635795000 | 1.990772000  |
| H  | -1.598090000            | -1.902392000 | 2.212635000  |
| H  | -1.087741000            | -1.173550000 | 3.736936000  |
| H  | 0.630151000             | 1.657827000  | 0.455384000  |
| H  | 0.661850000             | 1.291012000  | 1.149747000  |
| H  | 3.237178000             | -1.983666000 | 2.085569000  |
| C  | 3.592899000             | 0.581122000  | -0.048470000 |
| C  | 4.853736000             | 0.434928000  | 0.537928000  |
| C  | 3.352348000             | 1.697439000  | -0.848758000 |
| C  | 5.845293000             | 1.385553000  | 0.333589000  |
| H  | 5.066286000             | -0.425720000 | 1.164449000  |
| C  | 4.346470000             | 2.647530000  | -1.060616000 |
| H  | 2.382486000             | 1.830009000  | -1.313451000 |
| C  | 5.593063000             | 2.494758000  | -0.467822000 |
| H  | 6.816121000             | 1.260740000  | 0.800710000  |
| H  | 4.142222000             | 3.508488000  | -1.687656000 |
| H  | 6.366979000             | 3.237542000  | -0.627517000 |
| C  | 2.974103000             | -2.080551000 | -0.826034000 |
| H  | 4.054412000             | -2.062793000 | -0.640783000 |
| C  | 2.724910000             | -1.802118000 | -2.308170000 |
| H  | 3.220460000             | -2.561351000 | -2.921249000 |
| H  | 1.655685000             | -1.832831000 | -2.537437000 |
| H  | 3.110003000             | -0.824966000 | -2.613468000 |
| C  | 2.440506000             | -3.452503000 | -0.415109000 |
| H  | 1.365443000             | -3.539891000 | -0.580696000 |

|   |              |              |              |
|---|--------------|--------------|--------------|
| H | 2.928262000  | -4.225165000 | -1.018158000 |
| H | 2.641976000  | -3.678658000 | 0.634362000  |
| P | -2.013086000 | 0.670469000  | 0.673164000  |
| C | -2.145841000 | 0.172227000  | 2.440285000  |
| H | -1.818472000 | 1.036781000  | 3.027058000  |
| H | -3.161050000 | -0.080790000 | 2.749856000  |
| C | -2.350740000 | 2.501021000  | 0.700377000  |
| H | -1.548798000 | 2.881429000  | 1.345114000  |
| C | -3.696934000 | 2.869452000  | 1.322166000  |
| H | -3.832334000 | 2.428538000  | 2.313667000  |
| H | -3.772216000 | 3.956071000  | 1.431984000  |
| H | -4.525872000 | 2.543636000  | 0.687306000  |
| C | -2.192311000 | 3.115539000  | -0.689203000 |
| H | -2.346433000 | 4.197949000  | -0.638729000 |
| H | -1.198685000 | 2.936735000  | -1.105976000 |
| H | -2.930507000 | 2.709927000  | -1.388482000 |
| C | -3.471624000 | -0.014359000 | -0.205369000 |
| C | -3.374599000 | -0.231085000 | -1.582042000 |
| C | -4.687726000 | -0.279306000 | 0.428289000  |
| C | -4.464497000 | -0.695554000 | -2.308150000 |
| H | -2.437647000 | -0.042835000 | -2.093080000 |
| C | -5.776210000 | -0.751927000 | -0.295118000 |
| H | -4.800490000 | -0.114138000 | 1.493155000  |
| C | -5.667627000 | -0.959528000 | -1.665310000 |
| H | -4.367130000 | -0.859612000 | -3.375540000 |
| H | -6.711818000 | -0.956346000 | 0.213887000  |
| H | -6.517229000 | -1.330020000 | -2.228371000 |

### C3

|    | Coordinates (Angstroms) |              |              |
|----|-------------------------|--------------|--------------|
|    | X                       | Y            | Z            |
| Mn | 0.093540000             | -0.029751000 | 0.097025000  |
| O  | 0.114294000             | 0.865291000  | -2.702924000 |
| C  | 0.114576000             | 0.547629000  | -1.589615000 |
| N  | 0.120509000             | -0.630522000 | 2.100775000  |
| C  | -1.167672000            | -0.977439000 | 2.653947000  |
| C  | 1.094739000             | -1.645549000 | 2.432801000  |
| C  | 2.477865000             | -1.207398000 | 1.956976000  |
| H  | 2.789244000             | -0.323364000 | 2.520691000  |
| P  | 2.284975000             | -0.687826000 | 0.200361000  |
| C  | -0.533317000            | -1.615674000 | -0.418640000 |
| O  | -0.983270000            | -2.628124000 | -0.730563000 |
| H  | 1.134519000             | -1.807576000 | 3.523690000  |
| H  | 0.854206000             | -2.635795000 | 1.990772000  |
| H  | -1.598090000            | -1.902392000 | 2.212635000  |
| H  | -1.087741000            | -1.173550000 | 3.736936000  |
| H  | 0.630151000             | 1.657827000  | 0.455384000  |
| H  | 0.661850000             | 1.291012000  | 1.149747000  |
| H  | 3.237178000             | -1.983666000 | 2.085569000  |
| C  | 3.592899000             | 0.581122000  | -0.048470000 |
| C  | 4.853736000             | 0.434928000  | 0.537928000  |
| C  | 3.352348000             | 1.697439000  | -0.848758000 |
| C  | 5.845293000             | 1.385553000  | 0.333589000  |
| H  | 5.066286000             | -0.425720000 | 1.164449000  |
| C  | 4.346470000             | 2.647530000  | -1.060616000 |
| H  | 2.382486000             | 1.830009000  | -1.313451000 |
| C  | 5.593063000             | 2.494758000  | -0.467822000 |
| H  | 6.816121000             | 1.260740000  | 0.800710000  |
| H  | 4.142222000             | 3.508488000  | -1.687656000 |
| H  | 6.366979000             | 3.237542000  | -0.627517000 |
| C  | 2.974103000             | -2.080551000 | -0.826034000 |
| H  | 4.054412000             | -2.062793000 | -0.640783000 |
| C  | 2.724910000             | -1.802118000 | -2.308170000 |
| H  | 3.220460000             | -2.561351000 | -2.921249000 |
| H  | 1.655685000             | -1.832831000 | -2.537437000 |
| H  | 3.110003000             | -0.824966000 | -2.613468000 |
| C  | 2.440506000             | -3.452503000 | -0.415109000 |
| H  | 1.365443000             | -3.539891000 | -0.580696000 |
| H  | 2.928262000             | -4.225165000 | -1.018158000 |
| H  | 2.641976000             | -3.678658000 | 0.634362000  |
| P  | -2.013086000            | 0.670469000  | 0.673164000  |
| C  | -2.145841000            | 0.172227000  | 2.440285000  |
| H  | -1.818472000            | 1.036781000  | 3.027058000  |



|   |              |              |              |
|---|--------------|--------------|--------------|
| H | -3.161050000 | -0.080790000 | 2.749856000  |
| C | -2.350740000 | 2.501021000  | 0.700377000  |
| H | -1.548798000 | 2.881429000  | 1.345114000  |
| C | -3.696934000 | 2.869452000  | 1.322166000  |
| H | -3.832334000 | 2.428538000  | 2.313667000  |
| H | -3.772216000 | 3.956071000  | 1.431984000  |
| H | -4.525872000 | 2.543636000  | 0.687306000  |
| C | -2.192311000 | 3.115539000  | -0.689203000 |
| H | -2.346433000 | 4.197949000  | -0.638729000 |
| H | -1.198685000 | 2.936735000  | -1.105976000 |
| H | -2.930507000 | 2.709927000  | -1.388482000 |
| C | -3.471624000 | -0.014359000 | -0.205369000 |
| C | -3.374599000 | -0.231085000 | -1.582042000 |
| C | -4.687726000 | -0.279306000 | 0.428289000  |
| C | -4.464497000 | -0.695554000 | -2.308150000 |
| H | -2.437647000 | -0.042835000 | -2.093080000 |
| C | -5.776210000 | -0.751927000 | -0.295118000 |
| H | -4.800490000 | -0.114138000 | 1.493155000  |
| C | -5.667627000 | -0.959528000 | -1.665310000 |
| H | -4.367130000 | -0.859612000 | -3.375540000 |
| H | -6.711818000 | -0.956346000 | 0.213887000  |
| H | -6.517229000 | -1.330020000 | -2.228371000 |

-----

**TSB3-1**

-----

|    | Coordinates (Angstroms) |              |              |
|----|-------------------------|--------------|--------------|
|    | X                       | Y            | Z            |
| Mn | 0.021154000             | -0.038899000 | 0.124497000  |
| O  | 0.124168000             | 1.174957000  | -2.547051000 |
| C  | 0.087589000             | 0.718724000  | -1.483577000 |
| N  | 0.034924000             | -0.673592000 | 2.149128000  |
| C  | -1.266975000            | -1.020469000 | 2.669475000  |
| C  | 1.036793000             | -1.668090000 | 2.452022000  |
| C  | 2.405494000             | -1.190425000 | 1.979029000  |
| H  | 2.697110000             | -0.305728000 | 2.552644000  |
| P  | 2.219593000             | -0.662382000 | 0.221105000  |
| C  | -0.509289000            | -1.616398000 | -0.525839000 |
| O  | -0.850525000            | -2.654142000 | -0.893923000 |
| H  | 1.082190000             | -1.860684000 | 3.536172000  |
| H  | 0.801963000             | -2.639853000 | 1.973908000  |
| H  | -1.660251000            | -1.942583000 | 2.198767000  |
| H  | -1.211923000            | -1.221598000 | 3.751697000  |
| C  | -2.249236000            | 0.119193000  | 2.427570000  |
| C  | 2.773537000             | -2.117476000 | -0.798136000 |
| H  | 2.088408000             | -2.913998000 | -0.483147000 |
| C  | 4.209726000             | -2.570572000 | -0.543594000 |
| H  | 4.927968000             | -1.822389000 | -0.890641000 |
| H  | 4.408338000             | -2.769862000 | 0.512484000  |
| H  | 4.405631000             | -3.497439000 | -1.092092000 |
| C  | 2.544876000             | -1.835447000 | -2.284178000 |
| H  | 2.810058000             | -2.716627000 | -2.876443000 |
| H  | 1.504189000             | -1.587514000 | -2.500885000 |
| H  | 3.171762000             | -1.005782000 | -2.627324000 |
| H  | 0.375536000             | 0.669564000  | 1.650326000  |
| H  | 0.515254000             | 1.350203000  | 1.007554000  |
| H  | 3.171785000             | -1.956038000 | 2.117489000  |
| P  | -2.101936000            | 0.620978000  | 0.657360000  |
| H  | -3.263294000            | -0.151225000 | 2.724528000  |
| H  | -1.948774000            | 0.990553000  | 3.019031000  |
| C  | 3.559800000             | 0.566282000  | -0.028173000 |
| C  | 4.735947000             | 0.535315000  | 0.726680000  |
| C  | 3.419601000             | 1.548480000  | -1.009862000 |
| C  | 5.743830000             | 1.466236000  | 0.507479000  |
| H  | 4.871541000             | -0.218836000 | 1.494143000  |
| C  | 4.431126000             | 2.475317000  | -1.235789000 |
| H  | 2.511816000             | 1.599677000  | -1.598160000 |
| C  | 5.593796000             | 2.437952000  | -0.475951000 |
| H  | 6.648398000             | 1.431799000  | 1.105002000  |
| H  | 4.304476000             | 3.232609000  | -2.001669000 |
| H  | 6.379300000             | 3.166209000  | -0.645888000 |
| C  | -2.496793000            | 2.439386000  | 0.705820000  |
| H  | -1.707735000            | 2.833110000  | 1.357923000  |
| C  | -3.858043000            | 2.757684000  | 1.322937000  |
| H  | -3.990091000            | 2.299903000  | 2.307232000  |

|   |              |              |              |
|---|--------------|--------------|--------------|
| H | -3.964958000 | 3.840034000  | 1.447462000  |
| H | -4.672478000 | 2.418926000  | 0.676146000  |
| C | -2.349466000 | 3.081134000  | -0.672235000 |
| H | -1.342201000 | 2.957922000  | -1.073463000 |
| H | -3.059103000 | 2.653836000  | -1.388301000 |
| H | -2.554835000 | 4.154192000  | -0.605476000 |
| C | -3.532324000 | -0.101171000 | -0.237374000 |
| C | -4.754795000 | -0.387924000 | 0.374185000  |
| C | -3.402898000 | -0.323697000 | -1.610447000 |
| C | -5.818505000 | -0.888101000 | -0.367435000 |
| H | -4.892191000 | -0.218742000 | 1.435746000  |
| C | -4.468704000 | -0.814047000 | -2.355131000 |
| H | -2.458152000 | -0.120722000 | -2.102144000 |
| C | -5.678542000 | -1.099579000 | -1.734259000 |
| H | -6.759462000 | -1.109574000 | 0.124318000  |
| H | -4.347718000 | -0.981076000 | -3.419645000 |
| H | -6.509112000 | -1.489985000 | -2.312099000 |

### TSC3-1

|    | Coordinates (Angstroms) |              |              |
|----|-------------------------|--------------|--------------|
|    | X                       | Y            | Z            |
| Mn | 0.021154000             | -0.038899000 | 0.124497000  |
| O  | 0.124168000             | 1.174957000  | -2.547051000 |
| C  | 0.087589000             | 0.718724000  | -1.483577000 |
| N  | 0.034924000             | -0.673592000 | 2.149128000  |
| C  | -1.266975000            | -1.020469000 | 2.669475000  |
| C  | 1.036793000             | -1.668090000 | 2.452022000  |
| C  | 2.405494000             | -1.190425000 | 1.979029000  |
| H  | 2.697110000             | -0.305728000 | 2.552644000  |
| P  | 2.219593000             | -0.662382000 | 0.221105000  |
| C  | -0.509289000            | -1.616398000 | -0.525839000 |
| O  | -0.850525000            | -2.654142000 | -0.893923000 |
| H  | 1.082190000             | -1.860684000 | 3.536172000  |
| H  | 0.801963000             | -2.639853000 | 1.973908000  |
| H  | -1.660251000            | -1.942583000 | 2.198767000  |
| H  | -1.211923000            | -1.221598000 | 3.751697000  |
| C  | -2.249236000            | 0.119193000  | 2.427570000  |
| C  | 2.773537000             | -2.117476000 | -0.798136000 |
| H  | 2.088408000             | -2.913998000 | -0.483147000 |
| C  | 4.209726000             | -2.570572000 | -0.543594000 |
| H  | 4.927968000             | -1.822389000 | -0.890641000 |
| H  | 4.408338000             | -2.769862000 | 0.512484000  |
| H  | 4.405631000             | -3.497439000 | -1.092092000 |
| C  | 2.544876000             | -1.835447000 | -2.284178000 |
| H  | 2.810058000             | -2.716627000 | -2.876443000 |
| H  | 1.504189000             | -1.587514000 | -2.500885000 |
| H  | 3.171762000             | -1.005782000 | -2.627324000 |
| H  | 0.375536000             | 0.669564000  | 1.650326000  |
| H  | 0.515254000             | 1.350203000  | 1.007554000  |
| H  | 3.171785000             | -1.956038000 | 2.117489000  |
| P  | -2.101936000            | 0.620978000  | 0.657360000  |
| H  | -3.263294000            | -0.151225000 | 2.724528000  |
| H  | -1.948774000            | 0.990553000  | 3.019031000  |
| C  | 3.559800000             | 0.566282000  | -0.028173000 |
| C  | 4.735947000             | 0.535315000  | 0.726680000  |
| C  | 3.419601000             | 1.548480000  | -1.009862000 |
| C  | 5.743830000             | 1.466236000  | 0.507479000  |
| H  | 4.871541000             | -0.218836000 | 1.494143000  |
| C  | 4.431126000             | 2.475317000  | -1.235789000 |
| H  | 2.511816000             | 1.599677000  | -1.598160000 |
| C  | 5.593796000             | 2.437952000  | -0.475951000 |
| H  | 6.648398000             | 1.431799000  | 1.105002000  |
| H  | 4.304476000             | 3.232609000  | -2.001669000 |
| H  | 6.379300000             | 3.166209000  | -0.645888000 |
| C  | -2.496793000            | 2.439386000  | 0.705820000  |
| H  | -1.707735000            | 2.833110000  | 1.357923000  |
| C  | -3.858043000            | 2.757684000  | 1.322937000  |
| H  | -3.990091000            | 2.299903000  | 2.307232000  |
| H  | -3.964958000            | 3.840034000  | 1.447462000  |
| H  | -4.672478000            | 2.418926000  | 0.676146000  |
| C  | -2.349466000            | 3.081134000  | -0.672235000 |
| H  | -1.342201000            | 2.957922000  | -1.073463000 |
| H  | -3.059103000            | 2.653836000  | -1.388301000 |

|   |              |              |              |
|---|--------------|--------------|--------------|
| H | -2.554835000 | 4.154192000  | -0.605476000 |
| C | -3.532324000 | -0.101171000 | -0.237374000 |
| C | -4.754795000 | -0.387924000 | 0.374185000  |
| C | -3.402898000 | -0.323697000 | -1.610447000 |
| C | -5.818505000 | -0.888101000 | -0.367435000 |
| H | -4.892191000 | -0.218742000 | 1.435746000  |
| C | -4.468704000 | -0.814047000 | -2.355131000 |
| H | -2.458152000 | -0.120722000 | -2.102144000 |
| C | -5.678542000 | -1.099579000 | -1.734259000 |
| H | -6.759462000 | -1.109574000 | 0.124318000  |
| H | -4.347718000 | -0.981076000 | -3.419645000 |
| H | -6.509112000 | -1.489985000 | -2.312099000 |

-----

**TSB1-2\_a**

-----

|    | Coordinates (Angstroms) |              |              |
|----|-------------------------|--------------|--------------|
|    | X                       | Y            | Z            |
| Mn | 0.590001000             | -0.593671000 | -0.039175000 |
| P  | 2.322675000             | 0.864300000  | 0.255003000  |
| O  | 1.187213000             | -2.381072000 | 2.206048000  |
| C  | 0.954608000             | -1.672600000 | 1.320069000  |
| N  | -0.024199000            | 0.862540000  | -1.494061000 |
| C  | 1.102168000             | 1.604698000  | -2.091750000 |
| C  | -0.924856000            | 0.327360000  | -2.534327000 |
| C  | -2.089980000            | -0.397661000 | -1.880376000 |
| C  | 1.986129000             | 2.181659000  | -0.996910000 |
| H  | -2.696501000            | -0.917479000 | -2.625492000 |
| H  | 1.445546000             | 2.970948000  | -0.467900000 |
| H  | -2.735708000            | 0.323334000  | -1.374281000 |
| P  | -1.409133000            | -1.543256000 | -0.595654000 |
| C  | 1.571511000             | -1.565864000 | -1.157684000 |
| O  | 2.265456000             | -2.195448000 | -1.836839000 |
| H  | 2.884252000             | 2.630962000  | -1.421117000 |
| C  | -2.772428000            | -1.661412000 | 0.629821000  |
| C  | -4.106878000            | -1.713296000 | 0.217493000  |
| C  | -2.488499000            | -1.711549000 | 1.993206000  |
| C  | -5.132857000            | -1.796410000 | 1.148958000  |
| H  | -4.352534000            | -1.670194000 | -0.838872000 |
| C  | -3.514568000            | -1.801613000 | 2.928606000  |
| H  | -1.459499000            | -1.663752000 | 2.329440000  |
| C  | -4.838154000            | -1.838575000 | 2.508479000  |
| H  | -6.164264000            | -1.824916000 | 0.814507000  |
| H  | -3.277546000            | -1.836623000 | 3.986240000  |
| H  | -5.638779000            | -1.899219000 | 3.237399000  |
| C  | 4.018970000             | 0.234099000  | -0.064719000 |
| C  | 4.961779000             | 0.881923000  | -0.863373000 |
| C  | 4.383597000             | -0.960775000 | 0.562407000  |
| C  | 6.235408000             | 0.348738000  | -1.031872000 |
| H  | 4.718607000             | 1.811837000  | -1.363660000 |
| C  | 5.659461000             | -1.486337000 | 0.407620000  |
| H  | 3.660105000             | -1.496076000 | 1.167186000  |
| C  | 6.589053000             | -0.833298000 | -0.393495000 |
| H  | 6.952503000             | 0.862662000  | -1.662801000 |
| H  | 5.921423000             | -2.414538000 | 0.903253000  |
| H  | 7.582078000             | -1.248602000 | -0.525611000 |
| H  | -1.293158000            | 1.137299000  | -3.175723000 |
| H  | -0.336214000            | -0.355153000 | -3.153708000 |
| H  | 1.666414000             | 0.902221000  | -2.712348000 |
| H  | 0.731231000             | 2.405673000  | -2.743321000 |
| H  | -0.572110000            | 1.524760000  | -0.937955000 |
| H  | -0.300760000            | 0.441316000  | 1.048938000  |
| C  | -1.447407000            | 2.530047000  | 0.970923000  |
| C  | -1.031274000            | 1.459571000  | 1.739757000  |
| C  | 2.541760000             | 1.854767000  | 1.814535000  |
| H  | 1.632407000             | 2.463176000  | 1.843696000  |
| C  | -1.532695000            | -3.236428000 | -1.368008000 |
| H  | -2.607029000            | -3.433336000 | -1.461352000 |
| H  | -1.812872000            | 0.800468000  | 2.100262000  |
| H  | -0.255932000            | 1.642590000  | 2.476406000  |
| F  | -0.476619000            | 3.508110000  | 0.726616000  |
| C  | -0.909837000            | -3.313967000 | -2.761276000 |
| H  | 0.168045000             | -3.147792000 | -2.735345000 |
| H  | -1.075708000            | -4.312769000 | -3.177544000 |
| H  | -1.351961000            | -2.596181000 | -3.457417000 |

|   |              |              |              |
|---|--------------|--------------|--------------|
| C | -0.923607000 | -4.272076000 | -0.422679000 |
| H | -1.070539000 | -5.279757000 | -0.823641000 |
| H | 0.152186000  | -4.111063000 | -0.306661000 |
| H | -1.380624000 | -4.238029000 | 0.570352000  |
| C | 3.745250000  | 2.794987000  | 1.774647000  |
| H | 3.742304000  | 3.436620000  | 2.661643000  |
| H | 4.686522000  | 2.238173000  | 1.767962000  |
| H | 3.730547000  | 3.448853000  | 0.897920000  |
| C | 2.567525000  | 0.953450000  | 3.046684000  |
| H | 2.625197000  | 1.562273000  | 3.954508000  |
| H | 1.671073000  | 0.332691000  | 3.111478000  |
| H | 3.438677000  | 0.290544000  | 3.040227000  |
| C | -2.634979000 | 2.665578000  | 0.178644000  |
| C | -3.747461000 | 1.818834000  | 0.385848000  |
| C | -2.743238000 | 3.633964000  | -0.842021000 |
| C | -4.879972000 | 1.918460000  | -0.402265000 |
| H | -3.721559000 | 1.072937000  | 1.171931000  |
| C | -3.886095000 | 3.722337000  | -1.625203000 |
| H | -1.919211000 | 4.315845000  | -1.016012000 |
| C | -4.962907000 | 2.864074000  | -1.423703000 |
| H | -5.711512000 | 1.246564000  | -0.214123000 |
| H | -3.934409000 | 4.476012000  | -2.405009000 |
| H | -5.853416000 | 2.939134000  | -2.037307000 |

### TSBI-2\_b

|    | Coordinates (Angstroms) |              |              |
|----|-------------------------|--------------|--------------|
|    | X                       | Y            | Z            |
| Mn | -0.209012000            | -0.834966000 | -0.053608000 |
| P  | 1.984845000             | -0.279695000 | 0.256654000  |
| O  | -0.515321000            | -2.477476000 | 2.355640000  |
| C  | -0.393721000            | -1.824372000 | 1.407222000  |
| N  | -0.054139000            | 0.583289000  | -1.654366000 |
| C  | 1.303052000             | 0.676669000  | -2.225535000 |
| C  | -1.079656000            | 0.418066000  | -2.702831000 |
| C  | -2.464413000            | 0.354528000  | -2.071056000 |
| C  | 2.313898000             | 0.917755000  | -1.114682000 |
| H  | -3.221567000            | 0.096308000  | -2.814715000 |
| H  | 2.176245000             | 1.920742000  | -0.700147000 |
| H  | -2.718527000            | 1.330083000  | -1.653719000 |
| P  | -2.405540000            | -0.848658000 | -0.667502000 |
| C  | 0.249244000             | -2.247949000 | -1.026996000 |
| O  | 0.585612000             | -3.181624000 | -1.621927000 |
| H  | 3.329573000             | 0.869312000  | -1.507725000 |
| C  | -3.696545000            | -0.241675000 | 0.490106000  |
| C  | -4.846658000            | 0.400599000  | 0.025574000  |
| C  | -3.551589000            | -0.449223000 | 1.861888000  |
| C  | -5.823355000            | 0.834246000  | 0.913313000  |
| H  | -4.985458000            | 0.575323000  | -1.036262000 |
| C  | -4.532936000            | -0.024768000 | 2.750975000  |
| H  | -2.659251000            | -0.930189000 | 2.243890000  |
| C  | -5.668907000            | 0.620940000  | 2.278787000  |
| H  | -6.705465000            | 1.340935000  | 0.537450000  |
| H  | -4.402161000            | -0.192185000 | 3.814360000  |
| H  | -6.429811000            | 0.961295000  | 2.972452000  |
| C  | 3.257845000             | -1.599400000 | 0.120414000  |
| C  | 4.496319000             | -1.416722000 | -0.497895000 |
| C  | 2.990812000             | -2.829247000 | 0.727365000  |
| C  | 5.439521000             | -2.437634000 | -0.514223000 |
| H  | 4.744214000             | -0.471803000 | -0.966783000 |
| C  | 3.936848000             | -3.846329000 | 0.723122000  |
| H  | 2.031183000             | -2.998603000 | 1.202195000  |
| C  | 5.163399000             | -3.653957000 | 0.098829000  |
| H  | 6.394401000             | -2.279077000 | -1.003475000 |
| H  | 3.710187000             | -4.793026000 | 1.200792000  |
| H  | 5.900762000             | -4.449057000 | 0.087458000  |
| H  | -1.028678000            | 1.245020000  | -3.421915000 |
| H  | -0.851654000            | -0.507685000 | -3.238908000 |
| H  | 1.510973000             | -0.265808000 | -2.740544000 |
| H  | 1.353969000             | 1.486379000  | -2.963767000 |
| H  | -0.237686000            | 1.472899000  | -1.185553000 |
| H  | -0.608916000            | 0.630737000  | 0.860747000  |
| C  | -0.844174000            | 2.957724000  | 0.416257000  |
| C  | -0.974659000            | 1.917129000  | 1.325905000  |

|   |              |              |              |
|---|--------------|--------------|--------------|
| C | 2.535254000  | 0.650719000  | 1.766580000  |
| H | 1.880668000  | 1.524574000  | 1.748006000  |
| C | -3.254849000 | -2.378188000 | -1.313859000 |
| H | -4.309231000 | -2.099070000 | -1.422897000 |
| H | -1.988070000 | 1.638419000  | 1.597867000  |
| H | -0.296014000 | 1.930187000  | 2.173139000  |
| F | -1.892148000 | 3.062039000  | -0.510619000 |
| C | -2.732752000 | -2.829974000 | -2.677469000 |
| H | -1.678497000 | -3.108502000 | -2.638699000 |
| H | -3.291329000 | -3.712661000 | -3.004698000 |
| H | -2.859070000 | -2.063621000 | -3.446459000 |
| C | -3.146920000 | -3.495901000 | -0.276237000 |
| H | -3.715134000 | -4.371204000 | -0.605945000 |
| H | -2.106414000 | -3.804146000 | -0.138833000 |
| H | -3.542250000 | -3.191154000 | 0.696830000  |
| C | 3.982192000  | 1.134228000  | 1.706108000  |
| H | 4.185629000  | 1.797191000  | 2.553437000  |
| H | 4.685277000  | 0.298374000  | 1.763709000  |
| H | 4.191767000  | 1.697759000  | 0.792801000  |
| C | 2.250075000  | -0.140308000 | 3.040923000  |
| H | 2.546501000  | 0.445887000  | 3.916715000  |
| H | 1.189091000  | -0.378583000 | 3.140281000  |
| H | 2.814734000  | -1.077820000 | 3.067831000  |
| C | 0.319635000  | 3.713675000  | 0.055208000  |
| C | 0.469535000  | 4.286125000  | -1.226573000 |
| C | 1.381147000  | 3.899063000  | 0.968882000  |
| C | 1.638829000  | 4.941573000  | -1.585065000 |
| H | -0.337159000 | 4.197095000  | -1.944692000 |
| C | 2.545893000  | 4.547627000  | 0.597030000  |
| H | 1.275117000  | 3.545222000  | 1.988010000  |
| C | 2.697030000  | 5.065120000  | -0.688771000 |
| H | 1.726174000  | 5.360766000  | -2.582672000 |
| H | 3.341987000  | 4.664144000  | 1.325625000  |
| H | 3.609220000  | 5.575575000  | -0.975619000 |

-----  
**TSB1-2\_c**  
 -----

|    | Coordinates (Angstroms) |              |              |
|----|-------------------------|--------------|--------------|
|    | X                       | Y            | Z            |
| Mn | -0.093281000            | -0.694425000 | 0.053973000  |
| P  | -2.189113000            | 0.155754000  | 0.458831000  |
| O  | 0.027349000             | 0.055080000  | -2.778943000 |
| C  | -0.011350000            | -0.225142000 | -1.656103000 |
| N  | -0.100097000            | -0.946282000 | 2.147658000  |
| C  | -1.432293000            | -1.177913000 | 2.733393000  |
| C  | 0.904529000             | -1.875695000 | 2.692455000  |
| C  | 2.264056000             | -1.607086000 | 2.057533000  |
| C  | -2.361233000            | -0.059993000 | 2.284492000  |
| H  | 2.992155000             | -2.363236000 | 2.361094000  |
| H  | -2.023068000            | 0.882046000  | 2.728235000  |
| H  | 2.636427000             | -0.630288000 | 2.377603000  |
| P  | 2.038700000             | -1.520624000 | 0.226402000  |
| C  | -0.817085000            | -2.262011000 | -0.352023000 |
| O  | -1.318981000            | -3.266051000 | -0.630458000 |
| H  | -3.382926000            | -0.229800000 | 2.624138000  |
| C  | 3.512605000             | -0.611671000 | -0.381653000 |
| C  | 4.722125000             | -0.639559000 | 0.314790000  |
| C  | 3.449823000             | 0.079002000  | -1.590826000 |
| C  | 5.838190000             | 0.023437000  | -0.179411000 |
| H  | 4.800724000             | -1.168661000 | 1.258514000  |
| C  | 4.568067000             | 0.735936000  | -2.091040000 |
| H  | 2.521383000             | 0.113766000  | -2.147643000 |
| C  | 5.763832000             | 0.713135000  | -1.384449000 |
| H  | 6.767729000             | 0.003583000  | 0.379239000  |
| H  | 4.499849000             | 1.271326000  | -3.031707000 |
| H  | 6.634737000             | 1.232279000  | -1.769275000 |
| C  | -3.612720000            | -0.712134000 | -0.316882000 |
| C  | -4.773780000            | -1.074136000 | 0.366858000  |
| C  | -3.532204000            | -0.985402000 | -1.685548000 |
| C  | -5.825936000            | -1.694296000 | -0.298864000 |
| H  | -4.876894000            | -0.876747000 | 1.427141000  |
| C  | -4.586345000            | -1.593043000 | -2.354322000 |
| H  | -2.632829000            | -0.730505000 | -2.234949000 |
| C  | -5.736531000            | -1.951711000 | -1.661038000 |

|   |              |              |              |
|---|--------------|--------------|--------------|
| H | -6.718527000 | -1.973843000 | 0.250287000  |
| H | -4.502133000 | -1.795204000 | -3.416308000 |
| H | -6.557953000 | -2.434662000 | -2.178858000 |
| H | 0.971280000  | -1.763992000 | 3.782701000  |
| H | 0.569453000  | -2.895082000 | 2.483508000  |
| H | -1.798332000 | -2.153157000 | 2.398778000  |
| H | -1.369384000 | -1.199022000 | 3.829392000  |
| H | 0.175520000  | 0.010236000  | 2.464386000  |
| H | 0.601771000  | 0.860403000  | 0.597643000  |
| C | 0.752346000  | 1.856690000  | 2.747457000  |
| C | 1.104884000  | 1.919769000  | 1.409042000  |
| H | -0.101563000 | 2.398596000  | 3.128865000  |
| H | 1.428297000  | 1.395384000  | 3.456745000  |
| F | 2.448807000  | 1.593010000  | 1.187652000  |
| C | -2.627340000 | 1.941536000  | 0.212971000  |
| H | -1.827975000 | 2.462152000  | 0.747721000  |
| C | 2.495926000  | -3.229081000 | -0.380185000 |
| H | 3.577198000  | -3.302637000 | -0.216403000 |
| C | 2.225152000  | -3.332951000 | -1.881855000 |
| H | 2.571643000  | -4.300160000 | -2.259261000 |
| H | 1.156577000  | -3.252394000 | -2.099202000 |
| H | 2.745632000  | -2.553840000 | -2.445193000 |
| C | 1.822374000  | -4.363220000 | 0.391947000  |
| H | 2.150697000  | -5.323167000 | -0.019438000 |
| H | 2.089672000  | -4.358310000 | 1.451732000  |
| H | 0.734906000  | -4.330077000 | 0.308124000  |
| C | -3.971764000 | 2.335704000  | 0.821873000  |
| H | -4.122212000 | 3.414249000  | 0.708960000  |
| H | -4.800809000 | 1.832305000  | 0.315280000  |
| H | -4.033392000 | 2.106052000  | 1.889192000  |
| C | -2.549277000 | 2.334393000  | -1.260789000 |
| H | -2.679267000 | 3.415693000  | -1.361720000 |
| H | -1.586008000 | 2.075483000  | -1.702418000 |
| H | -3.340316000 | 1.848553000  | -1.841072000 |
| C | 0.708234000  | 3.063115000  | 0.511224000  |
| C | 0.078976000  | 4.202427000  | 1.007365000  |
| C | 1.014795000  | 3.001705000  | -0.846878000 |
| C | -0.273180000 | 5.242321000  | 0.153089000  |
| H | -0.130183000 | 4.285380000  | 2.067275000  |
| C | 0.688183000  | 4.048303000  | -1.696913000 |
| H | 1.512117000  | 2.120617000  | -1.233087000 |
| C | 0.031304000  | 5.169624000  | -1.200862000 |
| H | -0.773195000 | 6.118091000  | 0.552695000  |
| H | 0.933429000  | 3.981230000  | -2.751238000 |
| H | -0.237725000 | 5.983370000  | -1.865673000 |

-----

**TSBI-2\_d**

|    | Coordinates (Angstroms) |              |              |
|----|-------------------------|--------------|--------------|
|    | X                       | Y            | Z            |
| Mn | 0.456498000             | 0.504924000  | -0.013127000 |
| P  | 2.289723000             | -0.828086000 | 0.363428000  |
| O  | 0.005921000             | -0.211016000 | -2.822544000 |
| C  | 0.177131000             | 0.052882000  | -1.708946000 |
| N  | 0.572460000             | 0.850673000  | 2.074150000  |
| C  | 1.880863000             | 0.555559000  | 2.682856000  |
| C  | 0.034483000             | 2.153450000  | 2.507529000  |
| C  | -1.397280000            | 2.272200000  | 1.999843000  |
| C  | 2.372719000             | -0.803905000 | 2.204939000  |
| H  | -1.817745000            | 3.260707000  | 2.194606000  |
| H  | 1.687990000             | -1.586217000 | 2.543869000  |
| H  | -2.008819000            | 1.532454000  | 2.521455000  |
| P  | -1.406431000            | 1.826573000  | 0.205714000  |
| C  | 1.498254000             | 1.857172000  | -0.490628000 |
| O  | 2.211322000             | 2.708916000  | -0.811720000 |
| H  | 3.357912000             | -1.031396000 | 2.613432000  |
| C  | -3.093214000            | 1.174421000  | -0.102423000 |
| C  | -4.167628000            | 1.460960000  | 0.741863000  |
| C  | -3.331948000            | 0.451472000  | -1.272621000 |
| C  | -5.451772000            | 1.034749000  | 0.422551000  |
| H  | -4.014472000            | 2.022185000  | 1.657158000  |
| C  | -4.618760000            | 0.047717000  | -1.604085000 |
| H  | -2.510037000            | 0.190709000  | -1.928263000 |
| C  | -5.681201000            | 0.336373000  | -0.756571000 |

|   |              |              |              |
|---|--------------|--------------|--------------|
| H | -6.274172000 | 1.257382000  | 1.093927000  |
| H | -4.785086000 | -0.511354000 | -2.517554000 |
| H | -6.684086000 | 0.009189000  | -1.008643000 |
| C | 3.918378000  | -0.206430000 | -0.222925000 |
| C | 5.052686000  | -0.103715000 | 0.583217000  |
| C | 4.023345000  | 0.151584000  | -1.570288000 |
| C | 6.259647000  | 0.345537000  | 0.057027000  |
| H | 5.011181000  | -0.372228000 | 1.632268000  |
| C | 5.230288000  | 0.585707000  | -2.100898000 |
| H | 3.147901000  | 0.102505000  | -2.209489000 |
| C | 6.352894000  | 0.685842000  | -1.286424000 |
| H | 7.129073000  | 0.424629000  | 0.700744000  |
| H | 5.291153000  | 0.856136000  | -3.149228000 |
| H | 7.294154000  | 1.034889000  | -1.696645000 |
| H | 0.052513000  | 2.229662000  | 3.602627000  |
| H | 0.672858000  | 2.945190000  | 2.105722000  |
| H | 2.579106000  | 1.344695000  | 2.385829000  |
| H | 1.804277000  | 0.570414000  | 3.777759000  |
| H | -0.107470000 | 0.151602000  | 2.431950000  |
| H | -0.521147000 | -0.865312000 | 0.631717000  |
| C | -1.643639000 | -1.177687000 | 2.689520000  |
| C | -1.248368000 | -1.712620000 | 1.474694000  |
| H | -1.034999000 | -1.330454000 | 3.572191000  |
| H | -2.611913000 | -0.709436000 | 2.796166000  |
| C | 2.374813000  | -2.629297000 | -0.090697000 |
| H | 1.437889000  | -3.022301000 | 0.307349000  |
| C | -1.558438000 | 3.473101000  | -0.670484000 |
| H | -2.588187000 | 3.793980000  | -0.475606000 |
| F | -0.199850000 | -2.651334000 | 1.635247000  |
| C | -0.612385000 | 4.544968000  | -0.127789000 |
| H | 0.434862000  | 4.295717000  | -0.302642000 |
| H | -0.810833000 | 5.490962000  | -0.641778000 |
| H | -0.751186000 | 4.724233000  | 0.940987000  |
| C | -1.379089000 | 3.292063000  | -2.177875000 |
| H | -1.548755000 | 4.244574000  | -2.689488000 |
| H | -0.364543000 | 2.960929000  | -2.416846000 |
| H | -2.081893000 | 2.565171000  | -2.592596000 |
| C | 3.543321000  | -3.359969000 | 0.569414000  |
| H | 3.496057000  | -4.426002000 | 0.325110000  |
| H | 4.505567000  | -2.979874000 | 0.212287000  |
| H | 3.521689000  | -3.274388000 | 1.658958000  |
| C | 2.379905000  | -2.830259000 | -1.605997000 |
| H | 3.317688000  | -2.488015000 | -2.053634000 |
| H | 2.276217000  | -3.896131000 | -1.831273000 |
| H | 1.557071000  | -2.306757000 | -2.098123000 |
| C | -2.222256000 | -2.246626000 | 0.456123000  |
| C | -1.757547000 | -2.626115000 | -0.801808000 |
| C | -3.561521000 | -2.455328000 | 0.771419000  |
| C | -2.612520000 | -3.200253000 | -1.731122000 |
| H | -0.713305000 | -2.467191000 | -1.045747000 |
| C | -4.424408000 | -3.016834000 | -0.162863000 |
| H | -3.928553000 | -2.187982000 | 1.755043000  |
| C | -3.953124000 | -3.395724000 | -1.413675000 |
| H | -2.232412000 | -3.492840000 | -2.704062000 |
| H | -5.468836000 | -3.162572000 | 0.090985000  |
| H | -4.626842000 | -3.839748000 | -2.138916000 |

TSC1-2\_a

|    | Coordinates (Angstroms) |              |              |
|----|-------------------------|--------------|--------------|
|    | X                       | Y            | Z            |
| Mn | 0.628266000             | -0.647040000 | -0.042722000 |
| P  | 2.390909000             | 0.781910000  | 0.168237000  |
| O  | 1.207574000             | -2.336690000 | 2.281237000  |
| C  | 0.982949000             | -1.665697000 | 1.364494000  |
| N  | 0.023333000             | 0.747261000  | -1.553281000 |
| C  | 1.161251000             | 1.417322000  | -2.212371000 |
| C  | -0.915608000            | 0.192472000  | -2.549385000 |
| C  | -2.075023000            | -0.499976000 | -1.849273000 |
| C  | 2.099953000             | 2.018935000  | -1.176445000 |
| H  | -2.697680000            | -1.039231000 | -2.566768000 |
| H  | 1.623281000             | 2.882239000  | -0.706032000 |
| H  | -2.707933000            | 0.239755000  | -1.355914000 |
| P  | -1.379277000            | -1.608660000 | -0.540857000 |

|    |              |              |              |
|----|--------------|--------------|--------------|
| C  | 1.586096000  | -1.686879000 | -1.120550000 |
| O  | 2.266531000  | -2.353679000 | -1.777809000 |
| H  | 3.013263000  | 2.374229000  | -1.653988000 |
| C  | -2.725361000 | -1.709273000 | 0.705052000  |
| C  | -4.060138000 | -1.835797000 | 0.311445000  |
| C  | -2.427248000 | -1.679785000 | 2.066134000  |
| C  | -5.072833000 | -1.916405000 | 1.257374000  |
| H  | -4.317757000 | -1.854728000 | -0.742750000 |
| C  | -3.439964000 | -1.762583000 | 3.016597000  |
| H  | -1.397889000 | -1.577359000 | 2.388256000  |
| C  | -4.764609000 | -1.876452000 | 2.613884000  |
| H  | -6.105081000 | -2.006664000 | 0.936651000  |
| H  | -3.191714000 | -1.732447000 | 4.071803000  |
| H  | -5.55263000  | -1.934576000 | 3.353831000  |
| C  | 4.087761000  | 0.115596000  | -0.075026000 |
| C  | 5.086190000  | 0.766748000  | -0.801688000 |
| C  | 4.398965000  | -1.096977000 | 0.545931000  |
| C  | 6.358083000  | 0.216110000  | -0.912647000 |
| H  | 4.888078000  | 1.715326000  | -1.286548000 |
| C  | 5.672505000  | -1.642404000 | 0.446881000  |
| H  | 3.636236000  | -1.630047000 | 1.101712000  |
| C  | 6.655085000  | -0.988606000 | -0.286856000 |
| H  | 7.118712000  | 0.733195000  | -1.487525000 |
| H  | 5.891285000  | -2.585905000 | 0.934430000  |
| H  | 7.646452000  | -1.419077000 | -0.375996000 |
| H  | -1.289606000 | 0.986643000  | -3.207044000 |
| H  | -0.352837000 | -0.516644000 | -3.163104000 |
| H  | 1.682694000  | 0.662398000  | -2.808105000 |
| H  | 0.804212000  | 2.196833000  | -2.897241000 |
| H  | -0.490107000 | 1.452170000  | -1.015262000 |
| H  | -0.226434000 | 0.468068000  | 0.981119000  |
| C  | -1.540638000 | 2.509914000  | 0.800374000  |
| C  | -1.058777000 | 1.506631000  | 1.621240000  |
| C  | 2.585504000  | 1.856607000  | 1.672310000  |
| H  | 1.660629000  | 2.441450000  | 1.669638000  |
| C  | -1.504228000 | -3.323699000 | -1.264929000 |
| H  | -2.578552000 | -3.531033000 | -1.329975000 |
| H  | -1.782389000 | 0.783073000  | 1.978420000  |
| H  | -0.303410000 | 1.755256000  | 2.358816000  |
| C  | -0.913149000 | -3.439549000 | -2.669412000 |
| H  | 0.162853000  | -3.260586000 | -2.676702000 |
| H  | -1.077088000 | -4.453523000 | -3.048154000 |
| H  | -1.381910000 | -2.750852000 | -3.377380000 |
| C  | -0.870158000 | -4.328043000 | -0.302137000 |
| H  | -1.017713000 | -5.347887000 | -0.670786000 |
| H  | 0.206370000  | -4.157376000 | -0.209517000 |
| H  | -1.309527000 | -4.267794000 | 0.697679000  |
| C  | 3.764778000  | 2.824083000  | 1.593123000  |
| H  | 3.730089000  | 3.519160000  | 2.438058000  |
| H  | 4.719881000  | 2.293173000  | 1.636981000  |
| H  | 3.749244000  | 3.422499000  | 0.677364000  |
| C  | 2.623690000  | 1.016366000  | 2.946545000  |
| H  | 2.683368000  | 1.670112000  | 3.822463000  |
| H  | 1.729678000  | 0.397015000  | 3.046653000  |
| H  | 3.497968000  | 0.357629000  | 2.967212000  |
| C  | -2.774721000 | 2.479071000  | 0.032199000  |
| C  | -3.840186000 | 1.648645000  | 0.436980000  |
| C  | -2.964401000 | 3.229920000  | -1.142979000 |
| C  | -5.003931000 | 1.554153000  | -0.308274000 |
| H  | -3.759209000 | 1.069150000  | 1.349372000  |
| C  | -4.133187000 | 3.128750000  | -1.885354000 |
| H  | -2.179811000 | 3.896219000  | -1.481966000 |
| C  | -5.162628000 | 2.285110000  | -1.482540000 |
| H  | -5.797969000 | 0.901059000  | 0.038448000  |
| H  | -4.237550000 | 3.716902000  | -2.791516000 |
| H  | -6.076478000 | 2.210548000  | -2.061067000 |
| Cl | -0.490812000 | 3.935597000  | 0.566068000  |

-----  
**TSC1-2\_b**  
 -----

|    | Coordinates (Angstroms) |              |              |
|----|-------------------------|--------------|--------------|
|    | X                       | Y            | Z            |
| Mn | -0.087296000            | -0.931346000 | -0.018351000 |
| P  | 2.059209000             | -0.194050000 | 0.268964000  |



|   |              |              |              |
|---|--------------|--------------|--------------|
| O | -0.258781000 | -2.500333000 | 2.451682000  |
| C | -0.191818000 | -1.879137000 | 1.476559000  |
| N | -0.057457000 | 0.443835000  | -1.662158000 |
| C | 1.290151000  | 0.669477000  | -2.219406000 |
| C | -1.033843000 | 0.119571000  | -2.720659000 |
| C | -2.418820000 | -0.068300000 | -2.116091000 |
| C | 2.260354000  | 1.024680000  | -1.103961000 |
| H | -3.119210000 | -0.458015000 | -2.858133000 |
| H | 2.007978000  | 2.004435000  | -0.689577000 |
| H | -2.798485000 | 0.894780000  | -1.772546000 |
| P | -2.268234000 | -1.167218000 | -0.635001000 |
| C | 0.491204000  | -2.329082000 | -0.951141000 |
| O | 0.904654000  | -3.245335000 | -1.524094000 |
| H | 3.277167000  | 1.095916000  | -1.489855000 |
| C | -3.610501000 | -0.594155000 | 0.480979000  |
| C | -4.805125000 | -0.071905000 | -0.019952000 |
| C | -3.456405000 | -0.710362000 | 1.862293000  |
| C | -5.815793000 | 0.336322000  | 0.841116000  |
| H | -4.952104000 | 0.031797000  | -1.090026000 |
| C | -4.471888000 | -0.313714000 | 2.725563000  |
| H | -2.531840000 | -1.099942000 | 2.270804000  |
| C | -5.651691000 | 0.214517000  | 2.216665000  |
| H | -6.731402000 | 0.753665000  | 0.436644000  |
| H | -4.334142000 | -0.411382000 | 3.796736000  |
| H | -6.439541000 | 0.535059000  | 2.889414000  |
| C | 3.425863000  | -1.413092000 | 0.096872000  |
| C | 4.613025000  | -1.156806000 | -0.591562000 |
| C | 3.279831000  | -2.646739000 | 0.737250000  |
| C | 5.623312000  | -2.110593000 | -0.645125000 |
| H | 4.769649000  | -0.207208000 | -1.089519000 |
| C | 4.292359000  | -3.596297000 | 0.694368000  |
| H | 2.360488000  | -2.874246000 | 1.265402000  |
| C | 5.466417000  | -3.331683000 | -0.000868000 |
| H | 6.536906000  | -1.895382000 | -1.188702000 |
| H | 4.157348000  | -4.548317000 | 1.195545000  |
| H | 6.254067000  | -4.075873000 | -0.043446000 |
| H | -1.055659000 | 0.912850000  | -3.478330000 |
| H | -0.693562000 | -0.799646000 | -3.206189000 |
| H | 1.599195000  | -0.253435000 | -2.719246000 |
| H | 1.267334000  | 1.469647000  | -2.969452000 |
| H | -0.353442000 | 1.320409000  | -1.222130000 |
| H | -0.627903000 | 0.505058000  | 0.824519000  |
| C | -1.012423000 | 2.866025000  | 0.411216000  |
| C | -1.033096000 | 1.819105000  | 1.320411000  |
| C | 2.583256000  | 0.776321000  | 1.764238000  |
| H | 1.849604000  | 1.584683000  | 1.785294000  |
| C | -2.991603000 | -2.796255000 | -1.186762000 |
| H | -4.063106000 | -2.603912000 | -1.316597000 |
| H | -1.997954000 | 1.471121000  | 1.673376000  |
| H | -0.273954000 | 1.824196000  | 2.095622000  |
| C | -2.427433000 | -3.291108000 | -2.518525000 |
| H | -1.362206000 | -3.516599000 | -2.451240000 |
| H | -2.939478000 | -4.214601000 | -2.806863000 |
| H | -2.576552000 | -2.571680000 | -3.327935000 |
| C | -2.808586000 | -3.837470000 | -0.082476000 |
| H | -3.305584000 | -4.772186000 | -0.359986000 |
| H | -1.748560000 | -4.055271000 | 0.077543000  |
| H | -3.234008000 | -3.504880000 | 0.868468000  |
| C | 3.974229000  | 1.394353000  | 1.639804000  |
| H | 4.165128000  | 2.050745000  | 2.495159000  |
| H | 4.751681000  | 0.624969000  | 1.634242000  |
| H | 4.078627000  | 1.998125000  | 0.734444000  |
| C | 2.439486000  | -0.044211000 | 3.043663000  |
| H | 2.682158000  | 0.576368000  | 3.912202000  |
| H | 1.423298000  | -0.422037000 | 3.174136000  |
| H | 3.124337000  | -0.898085000 | 3.050166000  |
| C | 0.134572000  | 3.686329000  | 0.059872000  |
| C | 0.319158000  | 4.238907000  | -1.221569000 |
| C | 1.148333000  | 3.927378000  | 1.009142000  |
| C | 1.475805000  | 4.932791000  | -1.548507000 |
| H | -0.450686000 | 4.106372000  | -1.973150000 |
| C | 2.305374000  | 4.613302000  | 0.674943000  |
| H | 1.012807000  | 3.589655000  | 2.030117000  |
| C | 2.488785000  | 5.112461000  | -0.611706000 |
| H | 1.588156000  | 5.335139000  | -2.550247000 |
| H | 3.065066000  | 4.773945000  | 1.433042000  |
| H | 3.392719000  | 5.651803000  | -0.871147000 |

Cl -2.500957000 3.140550000 -0.535570000

---

TSC1-2\_c

---

|    | Coordinates (Angstroms) |              |              |
|----|-------------------------|--------------|--------------|
|    | X                       | Y            | Z            |
| Mn | -0.037412000            | -0.653480000 | 0.030751000  |
| P  | -2.207409000            | 0.092767000  | 0.325441000  |
| O  | 0.055185000             | -0.159482000 | -2.859217000 |
| C  | 0.029691000             | -0.343856000 | -1.716235000 |
| N  | -0.034195000            | -0.677567000 | 2.129878000  |
| C  | -1.357212000            | -0.841025000 | 2.758145000  |
| C  | 0.984403000             | -1.528976000 | 2.769216000  |
| C  | 2.338933000             | -1.303838000 | 2.105101000  |
| C  | -2.320618000            | 0.177042000  | 2.163190000  |
| H  | 3.085230000             | -2.000545000 | 2.494904000  |
| H  | -1.997043000            | 1.186858000  | 2.434082000  |
| H  | 2.687373000             | -0.286298000 | 2.305606000  |
| P  | 2.104916000             | -1.442620000 | 0.278842000  |
| C  | -0.680246000            | -2.287315000 | -0.205786000 |
| O  | -1.120638000            | -3.344511000 | -0.365867000 |
| H  | -3.328251000            | 0.048258000  | 2.558998000  |
| C  | 3.581997000             | -0.642599000 | -0.459365000 |
| C  | 4.820219000             | -0.672776000 | 0.184798000  |
| C  | 3.489382000             | -0.043294000 | -1.713748000 |
| C  | 5.937348000             | -0.095227000 | -0.404858000 |
| H  | 4.919497000             | -1.135509000 | 1.161271000  |
| C  | 4.608929000             | 0.523965000  | -2.311213000 |
| H  | 2.535864000             | -0.001668000 | -2.224636000 |
| C  | 5.833369000             | 0.504900000  | -1.655586000 |
| H  | 6.890088000             | -0.112241000 | 0.113223000  |
| H  | 4.518292000             | 0.992448000  | -3.284956000 |
| H  | 6.705041000             | 0.957891000  | -2.115109000 |
| C  | -3.532639000            | -1.065940000 | -0.214113000 |
| C  | -4.586167000            | -1.482442000 | 0.599559000  |
| C  | -3.484590000            | -1.532039000 | -1.531606000 |
| C  | -5.564561000            | -2.342751000 | 0.110821000  |
| H  | -4.661672000            | -1.143158000 | 1.625799000  |
| C  | -4.466325000            | -2.379370000 | -2.025366000 |
| H  | -2.663335000            | -1.240446000 | -2.177496000 |
| C  | -5.509408000            | -2.790266000 | -1.202678000 |
| H  | -6.371624000            | -2.661470000 | 0.761613000  |
| H  | -4.408022000            | -2.729730000 | -3.049918000 |
| H  | -6.271357000            | -3.462297000 | -1.582058000 |
| H  | 1.049713000             | -1.300824000 | 3.841330000  |
| H  | 0.667687000             | -2.570682000 | 2.669888000  |
| H  | -1.706910000            | -1.862202000 | 2.577306000  |
| H  | -1.281746000            | -0.697701000 | 3.844243000  |
| H  | 0.246934000             | 0.307082000  | 2.343390000  |
| H  | 0.637410000             | 0.995325000  | 0.434835000  |
| C  | 0.730928000             | 2.115299000  | 2.591086000  |
| C  | 0.971978000             | 2.225324000  | 1.234352000  |
| H  | -0.208878000            | 2.454704000  | 3.008117000  |
| H  | 1.511676000             | 1.822809000  | 3.280455000  |
| C  | -2.894165000            | 1.727581000  | -0.236524000 |
| H  | -2.133592000            | 2.444065000  | 0.079327000  |
| C  | 2.560285000             | -3.217378000 | -0.111768000 |
| H  | 3.645636000             | -3.256164000 | 0.035816000  |
| C  | 2.268852000             | -3.515041000 | -1.583483000 |
| H  | 2.631356000             | -4.515292000 | -1.840572000 |
| H  | 1.196990000             | -3.484538000 | -1.794034000 |
| H  | 2.765928000             | -2.802983000 | -2.247922000 |
| C  | 1.930893000             | -4.255069000 | 0.817696000  |
| H  | 2.271597000             | -5.253281000 | 0.523829000  |
| H  | 2.228416000             | -4.107699000 | 1.859018000  |
| H  | 0.841521000             | -4.256814000 | 0.764137000  |
| C  | -4.220012000            | 2.090897000  | 0.430176000  |
| H  | -4.547955000            | 3.074280000  | 0.077665000  |
| H  | -5.005143000            | 1.370636000  | 0.180195000  |
| H  | -4.137221000            | 2.146597000  | 1.518747000  |
| C  | -3.007734000            | 1.788926000  | -1.759666000 |
| H  | -3.248674000            | 2.811162000  | -2.064579000 |
| H  | -2.075544000            | 1.508319000  | -2.254232000 |
| H  | -3.804673000            | 1.134935000  | -2.125462000 |

|    |              |             |              |
|----|--------------|-------------|--------------|
| C  | 0.231697000  | 3.218262000 | 0.376730000  |
| C  | -0.462941000 | 4.276148000 | 0.959645000  |
| C  | 0.259886000  | 3.119480000 | -1.014398000 |
| C  | -1.155923000 | 5.188346000 | 0.168339000  |
| H  | -0.456785000 | 4.394027000 | 2.036439000  |
| C  | -0.408789000 | 4.040095000 | -1.804864000 |
| H  | 0.805678000  | 2.302951000 | -1.471945000 |
| C  | -1.132461000 | 5.073172000 | -1.214946000 |
| H  | -1.702124000 | 5.998766000 | 0.638955000  |
| H  | -0.378193000 | 3.942237000 | -2.884459000 |
| H  | -1.667684000 | 5.786706000 | -1.832132000 |
| Cl | 2.745893000  | 2.245870000 | 0.836643000  |

TSC1-2\_d

|    | Coordinates (Angstroms) |              |              |
|----|-------------------------|--------------|--------------|
|    | X                       | Y            | Z            |
| Mn | 0.477055000             | 0.525791000  | 0.007633000  |
| P  | 2.337505000             | -0.792697000 | 0.262016000  |
| O  | 0.037402000             | 0.042078000  | -2.853441000 |
| C  | 0.202255000             | 0.212771000  | -1.721333000 |
| N  | 0.597462000             | 0.716145000  | 2.117765000  |
| C  | 1.917911000             | 0.391431000  | 2.689829000  |
| C  | 0.080100000             | 1.998159000  | 2.636131000  |
| C  | -1.345198000            | 2.196438000  | 2.136404000  |
| C  | 2.444109000             | -0.909056000 | 2.099059000  |
| H  | -1.726757000            | 3.186076000  | 2.394438000  |
| H  | 1.792737000             | -1.736597000 | 2.389858000  |
| H  | -1.985689000            | 1.450691000  | 2.610166000  |
| P  | -1.368545000            | 1.867168000  | 0.317859000  |
| C  | 1.512301000             | 1.915073000  | -0.360200000 |
| O  | 2.223972000             | 2.791273000  | -0.610722000 |
| H  | 3.442080000             | -1.133384000 | 2.476815000  |
| C  | -3.075413000            | 1.300510000  | -0.040590000 |
| C  | -4.143962000            | 1.552640000  | 0.821433000  |
| C  | -3.331237000            | 0.692127000  | -1.270487000 |
| C  | -5.439912000            | 1.200652000  | 0.462215000  |
| H  | -3.976898000            | 2.029276000  | 1.781269000  |
| C  | -4.629101000            | 0.363949000  | -1.640199000 |
| H  | -2.514041000            | 0.459823000  | -1.942791000 |
| C  | -5.685632000            | 0.614350000  | -0.773612000 |
| H  | -6.258345000            | 1.392717000  | 1.147687000  |
| H  | -4.808125000            | -0.110245000 | -2.598075000 |
| H  | -6.697779000            | 0.345275000  | -1.055589000 |
| C  | 3.954448000             | -0.105687000 | -0.287789000 |
| C  | 5.102639000             | -0.085821000 | 0.504964000  |
| C  | 4.039409000             | 0.386810000  | -1.593509000 |
| C  | 6.302002000             | 0.413503000  | 0.007331000  |
| H  | 5.079812000             | -0.462170000 | 1.520833000  |
| C  | 5.237818000             | 0.873666000  | -2.096554000 |
| H  | 3.155322000             | 0.400166000  | -2.222384000 |
| C  | 6.373875000             | 0.890629000  | -1.294911000 |
| H  | 7.182175000             | 0.425309000  | 0.641185000  |
| H  | 5.281052000             | 1.251942000  | -3.111881000 |
| H  | 7.308700000             | 1.280039000  | -1.682894000 |
| H  | 0.098226000             | 2.001628000  | 3.733650000  |
| H  | 0.740402000             | 2.796863000  | 2.287182000  |
| H  | 2.592720000             | 1.220616000  | 2.454730000  |
| H  | 1.851898000             | 0.313222000  | 3.782308000  |
| H  | -0.078988000            | 0.002483000  | 2.429417000  |
| H  | -0.504994000            | -0.945119000 | 0.576291000  |
| C  | -1.961983000            | -1.160312000 | 2.478273000  |
| C  | -1.450096000            | -1.733223000 | 1.329653000  |
| H  | -1.504622000            | -1.308020000 | 3.447293000  |
| H  | -2.863494000            | -0.564501000 | 2.412406000  |
| C  | 2.442278000             | -2.543716000 | -0.352977000 |
| H  | 1.484865000             | -2.968142000 | -0.046506000 |
| C  | -1.471137000            | 3.572660000  | -0.454810000 |
| H  | -2.501249000            | 3.893945000  | -0.263517000 |
| C  | -0.529869000            | 4.600928000  | 0.174234000  |
| H  | 0.519957000             | 4.350994000  | 0.019350000  |
| H  | -0.703153000            | 5.574776000  | -0.295011000 |
| H  | -0.701351000            | 4.726968000  | 1.245694000  |

|    |              |              |              |
|----|--------------|--------------|--------------|
| C  | -1.261929000 | 3.485436000  | -1.966578000 |
| H  | -1.414369000 | 4.469377000  | -2.421021000 |
| H  | -0.245945000 | 3.161140000  | -2.206952000 |
| H  | -1.961214000 | 2.792991000  | -2.441093000 |
| C  | 3.569646000  | -3.345067000 | 0.295337000  |
| H  | 3.563058000  | -4.368855000 | -0.092300000 |
| H  | 4.549958000  | -2.913209000 | 0.070236000  |
| H  | 3.459460000  | -3.407141000 | 1.381258000  |
| C  | 2.521571000  | -2.600440000 | -1.878853000 |
| H  | 3.484271000  | -2.234048000 | -2.246864000 |
| H  | 2.414499000  | -3.638413000 | -2.208197000 |
| H  | 1.729817000  | -2.019075000 | -2.357354000 |
| C  | -2.339062000 | -2.156520000 | 0.185555000  |
| C  | -1.810937000 | -2.403857000 | -1.080023000 |
| C  | -3.693491000 | -2.393157000 | 0.405559000  |
| C  | -2.617486000 | -2.862960000 | -2.110220000 |
| H  | -0.753781000 | -2.235727000 | -1.250274000 |
| C  | -4.506941000 | -2.847035000 | -0.626900000 |
| H  | -4.107752000 | -2.229801000 | 1.393095000  |
| C  | -3.973179000 | -3.085118000 | -1.886510000 |
| H  | -2.186570000 | -3.047913000 | -3.088304000 |
| H  | -5.562409000 | -3.015473000 | -0.442031000 |
| H  | -4.607936000 | -3.443646000 | -2.690022000 |
| Cl | -0.317786000 | -3.133240000 | 1.748727000  |

### TS1\_H

|    | Coordinates (Angstroms) |              |              |
|----|-------------------------|--------------|--------------|
|    | X                       | Y            | Z            |
| Mn | 0.006052000             | 0.061996000  | 0.122774000  |
| P  | 2.246088000             | -0.095622000 | 0.378339000  |
| O  | -0.042095000            | -0.338150000 | -2.783878000 |
| C  | -0.021824000            | -0.194995000 | -1.635618000 |
| N  | 0.006713000             | 0.039123000  | 2.214756000  |
| C  | 1.268622000             | 0.436469000  | 2.865490000  |
| C  | -1.153957000            | 0.688033000  | 2.849824000  |
| C  | -2.435539000            | 0.129534000  | 2.242388000  |
| C  | 2.424033000             | -0.301720000 | 2.199891000  |
| H  | -3.315064000            | 0.694631000  | 2.557368000  |
| H  | 2.325092000             | -1.374642000 | 2.389029000  |
| H  | -2.565987000            | -0.906275000 | 2.567636000  |
| P  | -2.237185000            | 0.067141000  | 0.404846000  |
| C  | 0.070271000             | 1.826723000  | -0.072417000 |
| O  | 0.121131000             | 2.971621000  | -0.208576000 |
| H  | 3.395106000             | 0.015028000  | 2.585656000  |
| C  | -3.299907000            | -1.337060000 | -0.105341000 |
| C  | -4.581968000            | -1.497603000 | 0.426739000  |
| C  | -2.837709000            | -2.248836000 | -1.051331000 |
| C  | -5.380633000            | -2.559619000 | 0.026466000  |
| H  | -4.962202000            | -0.786354000 | 1.153156000  |
| C  | -3.642214000            | -3.307811000 | -1.461402000 |
| H  | -1.842074000            | -2.133622000 | -1.463894000 |
| C  | -4.911237000            | -3.466086000 | -0.920294000 |
| H  | -6.371634000            | -2.679684000 | 0.450229000  |
| H  | -3.272680000            | -4.010926000 | -2.199570000 |
| H  | -5.537008000            | -4.294209000 | -1.234745000 |
| C  | -3.186385000            | 1.493898000  | -0.248610000 |
| C  | -3.313337000            | 2.676232000  | 0.479895000  |
| C  | -3.703303000            | 1.436849000  | -1.544404000 |
| C  | -3.959378000            | 3.777315000  | -0.070832000 |
| H  | -2.900614000            | 2.752335000  | 1.480266000  |
| C  | -4.346850000            | 2.537496000  | -2.094233000 |
| H  | -3.609765000            | 0.526171000  | -2.127122000 |
| C  | -4.478435000            | 3.709924000  | -1.357924000 |
| H  | -4.051202000            | 4.691290000  | 0.505643000  |
| H  | -4.747829000            | 2.477801000  | -3.100071000 |
| H  | -4.979388000            | 4.570001000  | -1.788278000 |
| C  | 3.246175000             | -1.459613000 | -0.327835000 |
| C  | 4.609339000             | -1.571455000 | -0.040083000 |
| C  | 2.646969000             | -2.401594000 | -1.161024000 |
| C  | 5.354645000             | -2.615380000 | -0.569359000 |
| H  | 5.094239000             | -0.832972000 | 0.590786000  |
| C  | 3.395730000             | -3.445091000 | -1.696840000 |
| H  | 1.590152000             | -2.318885000 | -1.387701000 |

|   |              |              |              |
|---|--------------|--------------|--------------|
| C | 4.747842000  | -3.553882000 | -1.400137000 |
| H | 6.411807000  | -2.695419000 | -0.341040000 |
| H | 2.919942000  | -4.170452000 | -2.347453000 |
| H | 5.331967000  | -4.366853000 | -1.817366000 |
| C | 3.257334000  | 1.368583000  | -0.067203000 |
| C | 3.739247000  | 2.275430000  | 0.874274000  |
| C | 3.470564000  | 1.623709000  | -1.424738000 |
| C | 4.432300000  | 3.412434000  | 0.468583000  |
| H | 3.577581000  | 2.110652000  | 1.933575000  |
| C | 4.165842000  | 2.754133000  | -1.828235000 |
| H | 3.091729000  | 0.932710000  | -2.171831000 |
| C | 4.648753000  | 3.652790000  | -0.881338000 |
| H | 4.799935000  | 4.111398000  | 1.211975000  |
| H | 4.326928000  | 2.937757000  | -2.884725000 |
| H | 5.186877000  | 4.539668000  | -1.197224000 |
| H | -1.146907000 | 0.503333000  | 3.932408000  |
| H | -1.078111000 | 1.768727000  | 2.694866000  |
| H | 1.386866000  | 1.520596000  | 2.769729000  |
| H | 1.233977000  | 0.194124000  | 3.935920000  |
| H | -0.097497000 | -1.002466000 | 2.433874000  |
| H | -0.035078000 | -1.692586000 | 0.465604000  |
| C | -0.210474000 | -2.813986000 | 2.517032000  |
| C | -0.095025000 | -2.877150000 | 1.112290000  |
| H | 0.839504000  | -3.265870000 | 0.708826000  |
| H | 0.657369000  | -2.989209000 | 3.145419000  |
| H | -0.956078000 | -3.246100000 | 0.556963000  |
| H | -1.181032000 | -2.930027000 | 2.989279000  |

-----

**TS2\_CH<sub>3</sub>**

-----

|    | Coordinates (Angstroms) |              |              |
|----|-------------------------|--------------|--------------|
|    | X                       | Y            | Z            |
| Mn | 0.026983000             | 0.062148000  | 0.114373000  |
| P  | 2.270309000             | -0.021625000 | 0.385745000  |
| O  | 0.054872000             | -0.431028000 | -2.777888000 |
| C  | 0.037258000             | -0.248115000 | -1.634373000 |
| N  | 0.016759000             | 0.065798000  | 2.210631000  |
| C  | 1.258837000             | 0.520715000  | 2.860405000  |
| C  | -1.175056000            | 0.658922000  | 2.839990000  |
| C  | -2.415279000            | 0.025906000  | 2.221112000  |
| C  | 2.447054000             | -0.181571000 | 2.212952000  |
| H  | -3.335239000            | 0.481051000  | 2.592212000  |
| H  | 2.397575000             | -1.253462000 | 2.424836000  |
| H  | -2.437115000            | -1.036858000 | 2.481263000  |
| P  | -2.230073000            | 0.093968000  | 0.390508000  |
| C  | 0.066365000             | 1.825399000  | -0.115836000 |
| O  | 0.103320000             | 2.967557000  | -0.272269000 |
| H  | 3.401612000             | 0.186187000  | 2.594555000  |
| C  | -3.390692000            | -1.180902000 | -0.234354000 |
| C  | -4.557914000            | -1.503068000 | 0.460967000  |
| C  | -3.125373000            | -1.817639000 | -1.445594000 |
| C  | -5.435735000            | -2.455065000 | -0.040938000 |
| H  | -4.788509000            | -1.011963000 | 1.400255000  |
| C  | -4.010725000            | -2.760454000 | -1.955329000 |
| H  | -2.214505000            | -1.591551000 | -1.986828000 |
| C  | -5.164183000            | -3.084135000 | -1.251567000 |
| H  | -6.335522000            | -2.703318000 | 0.511326000  |
| H  | -3.791968000            | -3.249531000 | -2.898095000 |
| H  | -5.851439000            | -3.825922000 | -1.643465000 |
| C  | -3.089010000            | 1.629383000  | -0.142582000 |
| C  | -3.493975000            | 2.621615000  | 0.747578000  |
| C  | -3.264539000            | 1.837959000  | -1.512933000 |
| C  | -4.075632000            | 3.795994000  | 0.278442000  |
| H  | -3.356103000            | 2.496993000  | 1.815471000  |
| C  | -3.847996000            | 3.006547000  | -1.980058000 |
| H  | -2.941609000            | 1.082826000  | -2.222814000 |
| C  | -4.256786000            | 3.989789000  | -1.083920000 |
| H  | -4.385424000            | 4.559601000  | 0.983558000  |
| H  | -3.980732000            | 3.153033000  | -3.046250000 |
| H  | -4.709489000            | 4.904835000  | -1.449403000 |
| C  | 3.322181000             | -1.364320000 | -0.287063000 |
| C  | 4.685780000             | -1.421908000 | 0.014074000  |
| C  | 2.763964000             | -2.342616000 | -1.106943000 |
| C  | 5.472507000             | -2.448521000 | -0.488488000 |

|   |              |              |              |
|---|--------------|--------------|--------------|
| H | 5.138155000  | -0.654754000 | 0.634825000  |
| C | 3.553920000  | -3.368930000 | -1.615578000 |
| H | 1.706006000  | -2.305244000 | -1.340514000 |
| C | 4.906509000  | -3.423561000 | -1.305865000 |
| H | 6.529745000  | -2.486248000 | -0.249837000 |
| H | 3.109510000  | -4.123924000 | -2.254553000 |
| H | 5.523087000  | -4.223171000 | -1.701757000 |
| C | 3.235638000  | 1.464195000  | -0.089242000 |
| C | 3.685205000  | 2.406622000  | 0.832893000  |
| C | 3.447427000  | 1.694084000  | -1.451515000 |
| C | 4.345392000  | 3.554483000  | 0.403744000  |
| H | 3.523227000  | 2.261108000  | 1.894945000  |
| C | 4.108918000  | 2.836063000  | -1.878378000 |
| H | 3.093768000  | 0.974691000  | -2.183925000 |
| C | 4.560230000  | 3.770300000  | -0.950483000 |
| H | 4.689107000  | 4.280545000  | 1.132370000  |
| H | 4.268901000  | 3.000699000  | -2.938162000 |
| H | 5.072693000  | 4.665502000  | -1.284971000 |
| H | -1.164853000 | 0.474574000  | 3.922514000  |
| H | -1.158637000 | 1.742105000  | 2.682157000  |
| H | 1.335691000  | 1.606972000  | 2.748072000  |
| H | 1.228627000  | 0.294333000  | 3.934505000  |
| H | -0.051027000 | -0.977172000 | 2.433043000  |
| H | 0.033215000  | -1.681381000 | 0.504573000  |
| C | -0.093111000 | -2.793684000 | 2.543451000  |
| C | 0.142098000  | -2.868822000 | 1.153339000  |
| H | 1.186947000  | -3.032307000 | 0.887559000  |
| H | 0.735208000  | -2.848032000 | 3.243552000  |
| H | -1.075825000 | -3.039896000 | 2.938702000  |
| C | -0.798893000 | -3.679830000 | 0.280724000  |
| H | -1.842950000 | -3.468717000 | 0.525445000  |
| H | -0.654409000 | -3.464861000 | -0.782722000 |
| H | -0.624977000 | -4.747415000 | 0.449468000  |

-----

**TS1\_CH3**

-----

|    | Coordinates (Angstroms) |              |              |
|----|-------------------------|--------------|--------------|
|    | X                       | Y            | Z            |
| Mn | 0.055148000             | 0.142021000  | 0.047192000  |
| P  | 2.282292000             | -0.154368000 | 0.320899000  |
| O  | 0.009946000             | 0.034560000  | -2.886014000 |
| C  | 0.033654000             | 0.060957000  | -1.729287000 |
| N  | -0.001626000            | -0.107183000 | 2.112081000  |
| C  | 1.269682000             | 0.097547000  | 2.832325000  |
| C  | -1.105825000            | 0.591947000  | 2.793707000  |
| C  | -2.429321000            | 0.229482000  | 2.130600000  |
| C  | 2.391904000             | -0.624071000 | 2.096850000  |
| H  | -3.235927000            | 0.891485000  | 2.451493000  |
| H  | 2.217823000             | -1.703109000 | 2.131532000  |
| H  | -2.705263000            | -0.791206000 | 2.401357000  |
| P  | -2.192392000            | 0.243107000  | 0.293446000  |
| C  | 0.215378000             | 1.908560000  | 0.033168000  |
| O  | 0.337829000             | 3.056429000  | 0.018643000  |
| H  | 3.369690000             | -0.437360000 | 2.545298000  |
| C  | -3.303226000            | -1.089815000 | -0.295745000 |
| C  | -4.591014000            | -1.233369000 | 0.227495000  |
| C  | -2.861531000            | -1.981784000 | -1.269637000 |
| C  | -5.414462000            | -2.262675000 | -0.205819000 |
| H  | -4.953392000            | -0.538011000 | 0.977961000  |
| C  | -3.690643000            | -3.008360000 | -1.712093000 |
| H  | -1.862009000            | -1.879416000 | -1.676230000 |
| C  | -4.963651000            | -3.153130000 | -1.176750000 |
| H  | -6.408679000            | -2.371995000 | 0.213232000  |
| H  | -3.336012000            | -3.699173000 | -2.468952000 |
| H  | -5.607379000            | -3.958040000 | -1.514314000 |
| C  | -3.060615000            | 1.746795000  | -0.295443000 |
| C  | -3.040379000            | 2.917580000  | 0.463249000  |
| C  | -3.661325000            | 1.765727000  | -1.555047000 |
| C  | -3.624099000            | 4.081956000  | -0.020715000 |
| H  | -2.559775000            | 2.932813000  | 1.435969000  |
| C  | -4.242179000            | 2.931191000  | -2.039329000 |
| H  | -3.682370000            | 0.865902000  | -2.161037000 |
| C  | -4.227503000            | 4.091040000  | -1.272742000 |
| H  | -3.601585000            | 4.984922000  | 0.579517000  |

|   |              |              |              |
|---|--------------|--------------|--------------|
| H | -4.708579000 | 2.931470000  | -3.018346000 |
| H | -4.681193000 | 4.999874000  | -1.652305000 |
| C | 3.240616000  | -1.452588000 | -0.549784000 |
| C | 4.601904000  | -1.636559000 | -0.292833000 |
| C | 2.604712000  | -2.278623000 | -1.473815000 |
| C | 5.309052000  | -2.638531000 | -0.942713000 |
| H | 5.114898000  | -0.985944000 | 0.408665000  |
| C | 3.314559000  | -3.279909000 | -2.128967000 |
| H | 1.548835000  | -2.140454000 | -1.676073000 |
| C | 4.665221000  | -3.461858000 | -1.862693000 |
| H | 6.365198000  | -2.774961000 | -0.737601000 |
| H | 2.809429000  | -3.915835000 | -2.847474000 |
| H | 5.219274000  | -4.242460000 | -2.372599000 |
| C | 3.364824000  | 1.310831000  | 0.111141000  |
| C | 3.954582000  | 1.989921000  | 1.174891000  |
| C | 3.532859000  | 1.805166000  | -1.185492000 |
| C | 4.708469000  | 3.137948000  | 0.946820000  |
| H | 3.830057000  | 1.637687000  | 2.192483000  |
| C | 4.289337000  | 2.944995000  | -1.412991000 |
| H | 3.063292000  | 1.297310000  | -2.022734000 |
| C | 4.879641000  | 3.615450000  | -0.345166000 |
| H | 5.160664000  | 3.657837000  | 1.784431000  |
| H | 4.412215000  | 3.317467000  | -2.423932000 |
| H | 5.463910000  | 4.511735000  | -0.521929000 |
| H | -1.136467000 | 0.311996000  | 3.855322000  |
| H | -0.922475000 | 1.669645000  | 2.740036000  |
| H | 1.470160000  | 1.172491000  | 2.893495000  |
| H | 1.185261000  | -0.287649000 | 3.857337000  |
| H | -0.213572000 | -1.172560000 | 2.225612000  |
| H | -0.068396000 | -1.667489000 | 0.212382000  |
| C | -0.415939000 | -2.913993000 | 2.119380000  |
| C | -0.083926000 | -2.861035000 | 0.737507000  |
| H | 0.930163000  | -3.154973000 | 0.467049000  |
| H | 0.383532000  | -3.182219000 | 2.808266000  |
| H | -0.809351000 | -3.281893000 | 0.037254000  |
| C | -1.816423000 | -3.293960000 | 2.545146000  |
| H | -2.109006000 | -2.846312000 | 3.503703000  |
| H | -2.553612000 | -2.970633000 | 1.800840000  |
| H | -1.953387000 | -4.381194000 | 2.658414000  |

-----

**TS2\_Ph**

|    | Coordinates (Angstroms) |              |              |
|----|-------------------------|--------------|--------------|
|    | X                       | Y            | Z            |
| Mn | 0.316759000             | 0.426710000  | 0.130407000  |
| P  | 2.513510000             | -0.059231000 | 0.408657000  |
| O  | 0.264645000             | -0.173373000 | -2.741540000 |
| C  | 0.271029000             | 0.049152000  | -1.605460000 |
| N  | 0.337544000             | 0.528266000  | 2.217338000  |
| C  | 1.630943000             | 0.887020000  | 2.826503000  |
| C  | -0.772497000            | 1.262280000  | 2.849469000  |
| C  | -2.084914000            | 0.801944000  | 2.227426000  |
| C  | 2.729514000             | 0.005929000  | 2.241906000  |
| H  | -2.941020000            | 1.352027000  | 2.622433000  |
| H  | 2.602317000             | -1.018746000 | 2.600469000  |
| H  | -2.237628000            | -0.259149000 | 2.447717000  |
| P  | -1.893892000            | 0.911199000  | 0.402408000  |
| C  | 0.699975000             | 2.134119000  | -0.184217000 |
| O  | 0.952707000             | 3.239459000  | -0.395063000 |
| H  | 3.723369000             | 0.343354000  | 2.542767000  |
| C  | -3.312133000            | -0.018303000 | -0.288769000 |
| C  | -4.586700000            | 0.104927000  | 0.269746000  |
| C  | -3.143856000            | -0.781977000 | -1.440351000 |
| C  | -5.673496000            | -0.527889000 | -0.316725000 |
| H  | -4.738548000            | 0.706274000  | 1.160188000  |
| C  | -4.236851000            | -1.399307000 | -2.038544000 |
| H  | -2.157692000            | -0.907184000 | -1.869084000 |
| C  | -5.500690000            | -1.273882000 | -1.478884000 |
| H  | -6.658377000            | -0.429344000 | 0.126824000  |
| H  | -4.093082000            | -1.989819000 | -2.936152000 |
| H  | -6.352015000            | -1.760514000 | -1.942434000 |
| C  | -2.396338000            | 2.622292000  | -0.048781000 |
| C  | -2.689899000            | 3.614732000  | 0.883169000  |
| C  | -2.427010000            | 2.941432000  | -1.409182000 |

|   |              |              |              |
|---|--------------|--------------|--------------|
| C | -3.015716000 | 4.902007000  | 0.463743000  |
| H | -2.664959000 | 3.402643000  | 1.945914000  |
| C | -2.757370000 | 4.221748000  | -1.827126000 |
| H | -2.186912000 | 2.183539000  | -2.148903000 |
| C | -3.052365000 | 5.207336000  | -0.889678000 |
| H | -3.239958000 | 5.665658000  | 1.200565000  |
| H | -2.778949000 | 4.452641000  | -2.886448000 |
| H | -3.304344000 | 6.210674000  | -1.215092000 |
| C | 3.255106000  | -1.663248000 | -0.077210000 |
| C | 4.483190000  | -2.080842000 | 0.442384000  |
| C | 2.595500000  | -2.475748000 | -0.996223000 |
| C | 5.031760000  | -3.295964000 | 0.056242000  |
| H | 5.018970000  | -1.452346000 | 1.146766000  |
| C | 3.148417000  | -3.689957000 | -1.390065000 |
| H | 1.639814000  | -2.161117000 | -1.398490000 |
| C | 4.364447000  | -4.102488000 | -0.861731000 |
| H | 5.982463000  | -3.614357000 | 0.469542000  |
| H | 2.624374000  | -4.314078000 | -2.105530000 |
| H | 4.795306000  | -5.050833000 | -1.163451000 |
| C | 3.738316000  | 1.125360000  | -0.272252000 |
| C | 4.164612000  | 2.234120000  | 0.457563000  |
| C | 4.172466000  | 0.974021000  | -1.590814000 |
| C | 5.022998000  | 3.167070000  | -0.113614000 |
| H | 3.823914000  | 2.386871000  | 1.475861000  |
| C | 5.029997000  | 1.905884000  | -2.160320000 |
| H | 3.844910000  | 0.120984000  | -2.176553000 |
| C | 5.458915000  | 3.004144000  | -1.422364000 |
| H | 5.346407000  | 4.025165000  | 0.465350000  |
| H | 5.362730000  | 1.773771000  | -3.183986000 |
| H | 6.128049000  | 3.732043000  | -1.867724000 |
| H | -0.782904000 | 1.073276000  | 3.931089000  |
| H | -0.618426000 | 2.335391000  | 2.696331000  |
| H | 1.826222000  | 1.946538000  | 2.633158000  |
| H | 1.586537000  | 0.748446000  | 3.915021000  |
| H | 0.173830000  | -0.495341000 | 2.496579000  |
| H | -0.056676000 | -1.274389000 | 0.583513000  |
| C | -0.070988000 | -2.245309000 | 2.717521000  |
| C | -0.109682000 | -2.434948000 | 1.317768000  |
| H | 0.812509000  | -2.831163000 | 0.896523000  |
| H | 0.858830000  | -2.431976000 | 3.244645000  |
| H | -0.973099000 | -2.305167000 | 3.316392000  |
| C | -1.302029000 | -3.059587000 | 0.647146000  |
| C | -2.569013000 | -3.084145000 | 1.228940000  |
| C | -1.136583000 | -3.672938000 | -0.595532000 |
| C | -3.631292000 | -3.721348000 | 0.599862000  |
| H | -2.731784000 | -2.614647000 | 2.192443000  |
| C | -2.192885000 | -4.319482000 | -1.225041000 |
| H | -0.159044000 | -3.655383000 | -1.067324000 |
| C | -3.446488000 | -4.350057000 | -0.625740000 |
| H | -4.608625000 | -3.725194000 | 1.070264000  |
| H | -2.035669000 | -4.800996000 | -2.184645000 |
| H | -4.276046000 | -4.849958000 | -1.113843000 |

#### TS1\_Ph

|    | Coordinates (Angstroms) |              |              |
|----|-------------------------|--------------|--------------|
|    | X                       | Y            | Z            |
| Mn | -0.443635000            | 0.408320000  | 0.085624000  |
| P  | -2.488808000            | -0.473317000 | -0.276023000 |
| O  | -0.888383000            | 1.295601000  | 2.846377000  |
| C  | -0.716741000            | 0.935382000  | 1.760326000  |
| N  | 0.003531000             | -0.464160000 | -1.797790000 |
| C  | -1.166136000            | -0.731734000 | -2.655308000 |
| C  | 1.089447000             | 0.208764000  | -2.537261000 |
| C  | 2.308441000             | 0.357576000  | -1.634862000 |
| C  | -2.248141000            | -1.428091000 | -1.837345000 |
| H  | 3.064711000             | 1.001554000  | -2.087194000 |
| H  | -1.899471000            | -2.418132000 | -1.530032000 |
| H  | 2.766558000             | -0.619844000 | -1.468455000 |
| P  | 1.744107000             | 0.968824000  | 0.018109000  |
| C  | -0.934917000            | 1.994314000  | -0.559085000 |
| O  | -1.267012000            | 3.024903000  | -0.958273000 |
| H  | -3.165915000            | -1.569608000 | -2.411698000 |
| C  | 2.970723000             | 0.292582000  | 1.197023000  |



|   |              |              |              |
|---|--------------|--------------|--------------|
| C | 4.341307000  | 0.405860000  | 0.953948000  |
| C | 2.534191000  | -0.354084000 | 2.350353000  |
| C | 5.257617000  | -0.136885000 | 1.843284000  |
| H | 4.695848000  | 0.915011000  | 0.063511000  |
| C | 3.452717000  | -0.891635000 | 3.246919000  |
| H | 1.471057000  | -0.451622000 | 2.537441000  |
| C | 4.813960000  | -0.788703000 | 2.991081000  |
| H | 6.320082000  | -0.050478000 | 1.643460000  |
| H | 3.102030000  | -1.394572000 | 4.141346000  |
| H | 5.531257000  | -1.211832000 | 3.685868000  |
| C | 2.156049000  | 2.756728000  | 0.047275000  |
| C | 2.233085000  | 3.511732000  | -1.122235000 |
| C | 2.289703000  | 3.400824000  | 1.279170000  |
| C | 2.456936000  | 4.883140000  | -1.063549000 |
| H | 2.111964000  | 3.038952000  | -2.091029000 |
| C | 2.513348000  | 4.769745000  | 1.337173000  |
| H | 2.224777000  | 2.831462000  | 2.200974000  |
| C | 2.599763000  | 5.514384000  | 0.165284000  |
| H | 2.515780000  | 5.457046000  | -1.981901000 |
| H | 2.620168000  | 5.256118000  | 2.300495000  |
| H | 2.773837000  | 6.583725000  | 0.211840000  |
| C | -3.285082000 | -1.665167000 | 0.867373000  |
| C | -4.456926000 | -2.336843000 | 0.508903000  |
| C | -2.723544000 | -1.898781000 | 2.120616000  |
| C | -5.045504000 | -3.237296000 | 1.385945000  |
| H | -4.918783000 | -2.147921000 | -0.455127000 |
| C | -3.318001000 | -2.794926000 | 3.003482000  |
| H | -1.811945000 | -1.384408000 | 2.402148000  |
| C | -4.476244000 | -3.466649000 | 2.635900000  |
| H | -5.953448000 | -3.756124000 | 1.098618000  |
| H | -2.872187000 | -2.966708000 | 3.976848000  |
| H | -4.939058000 | -4.167438000 | 3.322105000  |
| C | -3.870553000 | 0.688984000  | -0.599889000 |
| C | -4.361836000 | 0.961306000  | -1.874468000 |
| C | -4.386073000 | 1.395379000  | 0.490429000  |
| C | -5.360734000 | 1.913981000  | -2.056307000 |
| H | -3.969935000 | 0.441882000  | -2.741716000 |
| C | -5.383669000 | 2.341697000  | 0.309439000  |
| H | -4.002655000 | 1.205763000  | 1.488519000  |
| C | -5.874995000 | 2.602821000  | -0.966502000 |
| H | -5.734760000 | 2.116026000  | -3.054100000 |
| H | -5.775987000 | 2.879936000  | 1.165115000  |
| H | -6.651557000 | 3.346224000  | -1.108788000 |
| H | 1.357578000  | -0.365836000 | -3.432625000 |
| H | 0.715974000  | 1.184671000  | -2.862261000 |
| H | -1.527709000 | 0.225098000  | -3.045056000 |
| H | -0.877705000 | -1.355148000 | -3.511475000 |
| H | 0.363279000  | -1.389110000 | -1.508484000 |
| H | 0.027669000  | -1.210830000 | 0.598531000  |
| C | 0.354324000  | -2.638781000 | 0.592001000  |
| C | 0.771470000  | -3.172766000 | -0.625645000 |
| H | 0.021594000  | -3.591602000 | -1.292357000 |
| H | -0.621824000 | -2.941946000 | 0.957289000  |
| H | 1.083883000  | -2.517793000 | 1.389086000  |
| C | 2.136011000  | -3.189931000 | -1.116389000 |
| C | 3.251951000  | -2.863326000 | -0.320416000 |
| C | 2.395663000  | -3.518968000 | -2.463443000 |
| C | 4.535831000  | -2.846107000 | -0.846785000 |
| H | 3.114863000  | -2.610844000 | 0.724822000  |
| C | 3.678943000  | -3.498800000 | -2.986379000 |
| H | 1.560425000  | -3.783534000 | -3.106902000 |
| C | 4.765743000  | -3.153781000 | -2.184512000 |
| H | 5.366018000  | -2.581568000 | -0.199595000 |
| H | 3.834998000  | -3.749799000 | -4.031062000 |
| H | 5.769672000  | -3.133964000 | -2.593626000 |

-----  
**TS2\_F**  
 -----

|    | Coordinates (Angstroms) |              |              |
|----|-------------------------|--------------|--------------|
|    | X                       | Y            | Z            |
| Mn | 0.007996000             | 0.044656000  | 0.106918000  |
| P  | 2.252792000             | 0.021871000  | 0.375344000  |
| O  | -0.046264000            | -0.436336000 | -2.788190000 |
| C  | -0.019065000            | -0.249451000 | -1.648515000 |

|   |              |              |              |
|---|--------------|--------------|--------------|
| N | -0.003118000 | 0.045464000  | 2.231050000  |
| C | 1.233632000  | 0.540398000  | 2.861026000  |
| C | -1.212350000 | 0.615271000  | 2.851411000  |
| C | -2.437006000 | -0.033614000 | 2.218480000  |
| C | 2.434890000  | -0.132328000 | 2.206202000  |
| H | -3.370081000 | 0.401486000  | 2.582043000  |
| H | 2.418559000  | -1.205127000 | 2.421219000  |
| H | -2.452577000 | -1.099691000 | 2.465114000  |
| P | -2.248976000 | 0.049773000  | 0.385547000  |
| C | 0.014637000  | 1.814859000  | -0.103745000 |
| O | 0.038732000  | 2.957965000  | -0.253998000 |
| H | 3.379824000  | 0.260907000  | 2.586261000  |
| C | -3.401649000 | -1.229327000 | -0.235248000 |
| C | -4.776077000 | -1.131295000 | 0.003535000  |
| C | -2.907065000 | -2.313804000 | -0.953018000 |
| C | -5.638664000 | -2.112934000 | -0.461245000 |
| H | -5.175822000 | -0.277239000 | 0.541300000  |
| C | -3.774103000 | -3.297513000 | -1.420818000 |
| H | -1.842515000 | -2.399410000 | -1.130845000 |
| C | -5.136731000 | -3.198803000 | -1.175478000 |
| H | -6.703540000 | -2.029210000 | -0.273455000 |
| H | -3.378084000 | -4.141319000 | -1.974701000 |
| H | -5.812488000 | -3.964457000 | -1.541090000 |
| C | -3.113250000 | 1.583898000  | -0.133603000 |
| C | -3.509554000 | 2.578455000  | 0.757536000  |
| C | -3.303410000 | 1.787305000  | -1.503251000 |
| C | -4.095508000 | 3.751894000  | 0.290764000  |
| H | -3.363229000 | 2.455236000  | 1.824594000  |
| C | -3.890359000 | 2.954938000  | -1.967888000 |
| H | -2.991737000 | 1.026221000  | -2.212053000 |
| C | -4.289160000 | 3.941493000  | -1.070420000 |
| H | -4.399273000 | 4.517458000  | 0.996367000  |
| H | -4.034488000 | 3.098079000  | -3.033034000 |
| H | -4.744818000 | 4.855711000  | -1.434337000 |
| C | 3.341931000  | -1.294351000 | -0.290513000 |
| C | 4.698601000  | -1.333366000 | 0.044201000  |
| C | 2.822101000  | -2.263763000 | -1.145539000 |
| C | 5.517107000  | -2.333479000 | -0.460484000 |
| H | 5.120260000  | -0.572331000 | 0.693496000  |
| C | 3.644849000  | -3.263472000 | -1.656102000 |
| H | 1.769185000  | -2.244951000 | -1.403284000 |
| C | 4.990042000  | -3.299619000 | -1.313876000 |
| H | 6.568535000  | -2.357024000 | -0.195848000 |
| H | 3.230213000  | -4.012604000 | -2.321260000 |
| H | 5.631582000  | -4.078404000 | -1.711584000 |
| C | 3.185167000  | 1.528790000  | -0.098466000 |
| C | 3.622006000  | 2.478948000  | 0.821567000  |
| C | 3.385633000  | 1.762236000  | -1.461837000 |
| C | 4.259576000  | 3.638337000  | 0.389021000  |
| H | 3.467546000  | 2.331222000  | 1.884457000  |
| C | 4.024765000  | 2.915540000  | -1.891995000 |
| H | 3.040316000  | 1.036933000  | -2.192513000 |
| C | 4.464255000  | 3.857479000  | -0.966201000 |
| H | 4.594091000  | 4.370453000  | 1.115825000  |
| H | 4.176790000  | 3.082724000  | -2.952517000 |
| H | 4.959609000  | 4.761258000  | -1.303296000 |
| H | -1.207190000 | 0.437921000  | 3.934741000  |
| H | -1.207132000 | 1.697247000  | 2.686956000  |
| H | 1.273727000  | 1.625913000  | 2.727718000  |
| H | 1.224990000  | 0.334130000  | 3.939185000  |
| H | -0.043184000 | -0.976363000 | 2.421063000  |
| H | 0.089575000  | -1.671156000 | 0.429182000  |
| C | -0.106295000 | -2.988652000 | 2.450210000  |
| C | 0.322054000  | -2.927665000 | 1.148660000  |
| H | 1.387811000  | -2.973479000 | 0.945500000  |
| H | 0.624509000  | -2.977142000 | 3.249475000  |
| H | -1.145579000 | -3.179676000 | 2.690660000  |
| F | -0.374048000 | -3.654898000 | 0.185809000  |

-----  
**TS1\_F**  
 -----

|    | Coordinates (Angstroms) |             |             |
|----|-------------------------|-------------|-------------|
|    | X                       | Y           | Z           |
| Mn | 0.038385000             | 0.099767000 | 0.058672000 |

|   |              |              |              |
|---|--------------|--------------|--------------|
| P | 2.273298000  | -0.063285000 | 0.348391000  |
| O | 0.055075000  | -0.082098000 | -2.869490000 |
| C | 0.048008000  | -0.021127000 | -1.713688000 |
| N | 0.001918000  | -0.092521000 | 2.148846000  |
| C | 1.239693000  | 0.302205000  | 2.846219000  |
| C | -1.195627000 | 0.461921000  | 2.808968000  |
| C | -2.441058000 | -0.082750000 | 2.120307000  |
| C | 2.425353000  | -0.366567000 | 2.160783000  |
| H | -3.353442000 | 0.386889000  | 2.492837000  |
| H | 2.354306000  | -1.451013000 | 2.291287000  |
| H | -2.520883000 | -1.156556000 | 2.306698000  |
| P | -2.210788000 | 0.104448000  | 0.299841000  |
| C | 0.102913000  | 1.876212000  | -0.001496000 |
| O | 0.147979000  | 3.027577000  | -0.060787000 |
| H | 3.380558000  | -0.045683000 | 2.581004000  |
| C | -3.299460000 | -1.179647000 | -0.421967000 |
| C | -4.650015000 | -1.250074000 | -0.070438000 |
| C | -2.783820000 | -2.098559000 | -1.332388000 |
| C | -5.465935000 | -2.232039000 | -0.612980000 |
| H | -5.068047000 | -0.530050000 | 0.626185000  |
| C | -3.603913000 | -3.079061000 | -1.882921000 |
| H | -1.736691000 | -2.046584000 | -1.608204000 |
| C | -4.942821000 | -3.148196000 | -1.521843000 |
| H | -6.512161000 | -2.282435000 | -0.332037000 |
| H | -3.194234000 | -3.788630000 | -2.593361000 |
| H | -5.582125000 | -3.913876000 | -1.947627000 |
| C | -3.096874000 | 1.641698000  | -0.166378000 |
| C | -3.436786000 | 2.624290000  | 0.761130000  |
| C | -3.347756000 | 1.873209000  | -1.521336000 |
| C | -4.031921000 | 3.811423000  | 0.345027000  |
| H | -3.236930000 | 2.479043000  | 1.816849000  |
| C | -3.942070000 | 3.056513000  | -1.935621000 |
| H | -3.079345000 | 1.122781000  | -2.258474000 |
| C | -4.287430000 | 4.029096000  | -1.002064000 |
| H | -4.292944000 | 4.566905000  | 1.077986000  |
| H | -4.132895000 | 3.221875000  | -2.990211000 |
| H | -4.750178000 | 4.954608000  | -1.326366000 |
| C | 3.303164000  | -1.377087000 | -0.409412000 |
| C | 4.651381000  | -1.515717000 | -0.067711000 |
| C | 2.744369000  | -2.249103000 | -1.341111000 |
| C | 5.420816000  | -2.518334000 | -0.640243000 |
| H | 5.105414000  | -0.829003000 | 0.639969000  |
| C | 3.517368000  | -3.251433000 | -1.919708000 |
| H | 1.699666000  | -2.143897000 | -1.611417000 |
| C | 4.853750000  | -3.388228000 | -1.568163000 |
| H | 6.466167000  | -2.619282000 | -0.369760000 |
| H | 3.073350000  | -3.923207000 | -2.645917000 |
| H | 5.457055000  | -4.168914000 | -2.018411000 |
| C | 3.279269000  | 1.428935000  | -0.004101000 |
| C | 3.717056000  | 2.305458000  | 0.986140000  |
| C | 3.528669000  | 1.739552000  | -1.343640000 |
| C | 4.403667000  | 3.467403000  | 0.645093000  |
| H | 3.525062000  | 2.098098000  | 2.032979000  |
| C | 4.216678000  | 2.895229000  | -1.682583000 |
| H | 3.183277000  | 1.071953000  | -2.127301000 |
| C | 4.656281000  | 3.763419000  | -0.687474000 |
| H | 4.737652000  | 4.142932000  | 1.425082000  |
| H | 4.405278000  | 3.121641000  | -2.726128000 |
| H | 5.188818000  | 4.670228000  | -0.952123000 |
| H | -1.205486000 | 0.188961000  | 3.872099000  |
| H | -1.149810000 | 1.553417000  | 2.741186000  |
| H | 1.327943000  | 1.392409000  | 2.811122000  |
| H | 1.194006000  | 0.000973000  | 3.901026000  |
| H | -0.058792000 | -1.144004000 | 2.276458000  |
| H | -0.026316000 | -1.671104000 | 0.238206000  |
| C | -0.208540000 | -2.996898000 | 2.169959000  |
| C | 0.012236000  | -2.935246000 | 0.800982000  |
| H | 1.022301000  | -3.188658000 | 0.488803000  |
| H | 0.498964000  | -3.358559000 | 2.903229000  |
| H | -0.756670000 | -3.338119000 | 0.142930000  |
| F | -1.535320000 | -3.213324000 | 2.585263000  |

-----  
TS2\_NH<sub>2</sub>

-----  
Coordinates (Angstroms)

|    | X            | Y            | Z            |
|----|--------------|--------------|--------------|
| Mn | 0.039547000  | 0.099465000  | 0.104093000  |
| P  | 2.285424000  | 0.118311000  | 0.411709000  |
| O  | 0.204716000  | -0.219085000 | -2.808202000 |
| C  | 0.123257000  | -0.109442000 | -1.658057000 |
| N  | 0.034677000  | 0.022066000  | 2.190438000  |
| C  | 1.158192000  | 0.717676000  | 2.842026000  |
| C  | -1.246530000 | 0.321294000  | 2.853421000  |
| C  | -2.363546000 | -0.437632000 | 2.147155000  |
| C  | 2.468427000  | 0.208775000  | 2.249598000  |
| H  | -3.337510000 | -0.226359000 | 2.591273000  |
| H  | 2.638348000  | -0.816363000 | 2.588680000  |
| H  | -2.184052000 | -1.515273000 | 2.218153000  |
| P  | -2.227768000 | -0.050100000 | 0.359744000  |
| C  | 0.000381000  | 1.870231000  | -0.029353000 |
| O  | -0.016176000 | 3.021004000  | -0.108453000 |
| H  | 3.320555000  | 0.815699000  | 2.561481000  |
| C  | -3.302117000 | -1.263926000 | -0.498082000 |
| C  | -4.385974000 | -1.869923000 | 0.137252000  |
| C  | -3.048193000 | -1.559962000 | -1.836628000 |
| C  | -5.194261000 | -2.763979000 | -0.552930000 |
| H  | -4.597894000 | -1.659184000 | 1.179431000  |
| C  | -3.862771000 | -2.447902000 | -2.530406000 |
| H  | -2.206838000 | -1.103064000 | -2.343867000 |
| C  | -4.935416000 | -3.054393000 | -1.888468000 |
| H  | -6.029386000 | -3.235766000 | -0.046611000 |
| H  | -3.654962000 | -2.666505000 | -3.572119000 |
| H  | -5.569146000 | -3.750728000 | -2.426688000 |
| C  | -3.198521000 | 1.489494000  | 0.086382000  |
| C  | -4.048239000 | 2.053067000  | 1.036488000  |
| C  | -3.068822000 | 2.112959000  | -1.157095000 |
| C  | -4.756577000 | 3.215988000  | 0.748015000  |
| H  | -4.170084000 | 1.596354000  | 2.011869000  |
| C  | -3.782681000 | 3.266071000  | -1.449315000 |
| H  | -2.393145000 | 1.699453000  | -1.899612000 |
| C  | -4.628253000 | 3.822228000  | -0.494656000 |
| H  | -5.411432000 | 3.645449000  | 1.498524000  |
| H  | -3.669275000 | 3.738205000  | -2.418818000 |
| H  | -5.179524000 | 4.729106000  | -0.717827000 |
| C  | 3.352969000  | -1.287452000 | -0.081901000 |
| C  | 4.618125000  | -1.464469000 | 0.483981000  |
| C  | 2.914062000  | -2.179529000 | -1.057543000 |
| C  | 5.422847000  | -2.523207000 | 0.086932000  |
| H  | 4.981650000  | -0.768751000 | 1.233510000  |
| C  | 3.724285000  | -3.235812000 | -1.462850000 |
| H  | 1.931968000  | -2.051895000 | -1.498040000 |
| C  | 4.976476000  | -3.410388000 | -0.888694000 |
| H  | 6.401101000  | -2.655412000 | 0.535880000  |
| H  | 3.371760000  | -3.924382000 | -2.222698000 |
| H  | 5.607038000  | -4.236162000 | -1.199705000 |
| C  | 3.228209000  | 1.542340000  | -0.255281000 |
| C  | 3.322689000  | 2.739603000  | 0.453557000  |
| C  | 3.774213000  | 1.467683000  | -1.538028000 |
| C  | 3.964803000  | 3.839287000  | -0.103996000 |
| H  | 2.886116000  | 2.827585000  | 1.442809000  |
| C  | 4.413868000  | 2.567317000  | -2.094751000 |
| H  | 3.707138000  | 0.544896000  | -2.104914000 |
| C  | 4.512440000  | 3.755075000  | -1.378328000 |
| H  | 4.031071000  | 4.765115000  | 0.456778000  |
| H  | 4.837879000  | 2.494340000  | -3.090197000 |
| H  | 5.010575000  | 4.614066000  | -1.814121000 |
| H  | -1.201263000 | 0.024450000  | 3.909504000  |
| H  | -1.422471000 | 1.401952000  | 2.815747000  |
| H  | 1.042567000  | 1.795547000  | 2.691399000  |
| H  | 1.146242000  | 0.527842000  | 3.923633000  |
| H  | 0.209468000  | -1.024770000 | 2.381718000  |
| H  | 0.106925000  | -1.672791000 | 0.416593000  |
| C  | 0.414034000  | -2.795510000 | 2.409534000  |
| C  | 0.177179000  | -2.850194000 | 1.012766000  |
| H  | 1.028567000  | -3.199265000 | 0.421183000  |
| H  | 1.413708000  | -2.997299000 | 2.781762000  |
| H  | -0.412697000 | -3.006436000 | 3.083590000  |
| N  | -1.119332000 | -3.367857000 | 0.625446000  |
| H  | -1.279799000 | -3.282353000 | -0.372364000 |
| H  | -1.189774000 | -4.344115000 | 0.887549000  |

TS1\_NH<sub>2</sub>

|    | Coordinates (Angstroms) |              |              |
|----|-------------------------|--------------|--------------|
|    | X                       | Y            | Z            |
| Mn | 0.035987000             | 0.085489000  | 0.052462000  |
| P  | 2.273415000             | -0.057234000 | 0.341800000  |
| O  | 0.062633000             | -0.086567000 | -2.876847000 |
| C  | 0.051011000             | -0.032524000 | -1.720273000 |
| N  | 0.003033000             | -0.134995000 | 2.129384000  |
| C  | 1.228514000             | 0.276698000  | 2.837744000  |
| C  | -1.205940000            | 0.377128000  | 2.802330000  |
| C  | -2.442389000            | -0.168402000 | 2.097048000  |
| C  | 2.431723000             | -0.360658000 | 2.152454000  |
| H  | -3.364472000            | 0.270614000  | 2.483638000  |
| H  | 2.384316000             | -1.446431000 | 2.278752000  |
| H  | -2.490084000            | -1.253535000 | 2.240324000  |
| P  | -2.214135000            | 0.079864000  | 0.287723000  |
| C  | 0.090205000             | 1.859708000  | -0.001884000 |
| O  | 0.126088000             | 3.012129000  | -0.053854000 |
| H  | 3.379014000             | -0.017893000 | 2.573521000  |
| C  | -3.304609000            | -1.177990000 | -0.477984000 |
| C  | -4.662195000            | -1.236851000 | -0.152563000 |
| C  | -2.783809000            | -2.089700000 | -1.392577000 |
| C  | -5.480311000            | -2.199682000 | -0.725459000 |
| H  | -5.083925000            | -0.521638000 | 0.546769000  |
| C  | -3.605502000            | -3.051487000 | -1.973016000 |
| H  | -1.731109000            | -2.047881000 | -1.647696000 |
| C  | -4.951901000            | -3.108848000 | -1.638380000 |
| H  | -6.532570000            | -2.239875000 | -0.465887000 |
| H  | -3.191148000            | -3.755150000 | -2.686680000 |
| H  | -5.592908000            | -3.858976000 | -2.088783000 |
| C  | -3.100266000            | 1.630380000  | -0.132929000 |
| C  | -3.452402000            | 2.580396000  | 0.823484000  |
| C  | -3.343300000            | 1.904474000  | -1.481403000 |
| C  | -4.050933000            | 3.777485000  | 0.441510000  |
| H  | -3.259836000            | 2.401373000  | 1.875503000  |
| C  | -3.942268000            | 3.096784000  | -1.861604000 |
| H  | -3.065066000            | 1.179213000  | -2.239856000 |
| C  | -4.299140000            | 4.037047000  | -0.899608000 |
| H  | -4.320973000            | 4.508025000  | 1.196243000  |
| H  | -4.127707000            | 3.294154000  | -2.911677000 |
| H  | -4.765321000            | 4.970023000  | -1.196593000 |
| C  | 3.323232000             | -1.351601000 | -0.421668000 |
| C  | 4.673971000             | -1.470049000 | -0.082386000 |
| C  | 2.776589000             | -2.228683000 | -1.355562000 |
| C  | 5.458431000             | -2.457911000 | -0.660008000 |
| H  | 5.117734000             | -0.779013000 | 0.627631000  |
| C  | 3.564633000             | -3.216175000 | -1.939464000 |
| H  | 1.730006000             | -2.138348000 | -1.623812000 |
| C  | 4.903641000             | -3.332958000 | -1.590615000 |
| H  | 6.505695000             | -2.543448000 | -0.391441000 |
| H  | 3.130260000             | -3.892182000 | -2.667635000 |
| H  | 5.518788000             | -4.102005000 | -2.044995000 |
| C  | 3.255680000             | 1.452000000  | -0.007962000 |
| C  | 3.664602000             | 2.340130000  | 0.984422000  |
| C  | 3.513926000             | 1.764030000  | -1.345461000 |
| C  | 4.332412000             | 3.514197000  | 0.647779000  |
| H  | 3.463733000             | 2.132445000  | 2.029617000  |
| C  | 4.182567000             | 2.932368000  | -1.680158000 |
| H  | 3.190431000             | 1.087657000  | -2.130893000 |
| C  | 4.594147000             | 3.811605000  | -0.682766000 |
| H  | 4.644423000             | 4.198195000  | 1.429517000  |
| H  | 4.377865000             | 3.159823000  | -2.722277000 |
| H  | 5.112038000             | 4.727882000  | -0.943951000 |
| H  | -1.210814000            | 0.070527000  | 3.857304000  |
| H  | -1.180410000            | 1.471482000  | 2.774348000  |
| H  | 1.296636000             | 1.369089000  | 2.821307000  |
| H  | 1.183925000             | -0.042232000 | 3.888023000  |
| H  | -0.028131000            | -1.205222000 | 2.250419000  |
| H  | -0.035275000            | -1.707724000 | 0.249512000  |
| C  | -0.109838000            | -2.996116000 | 2.189024000  |
| C  | -0.018975000            | -2.925864000 | 0.779708000  |
| H  | 0.923881000             | -3.253741000 | 0.345155000  |
| H  | 0.778428000             | -3.309025000 | 2.739857000  |

|   |              |              |             |
|---|--------------|--------------|-------------|
| H | -0.877788000 | -3.295595000 | 0.216808000 |
| N | -1.406575000 | -3.262632000 | 2.776504000 |
| H | -1.654092000 | -4.248405000 | 2.751615000 |
| H | -1.448401000 | -2.973579000 | 3.745671000 |

-----

**TS2\_SH**

-----

|    | Coordinates (Angstroms) |              |              |
|----|-------------------------|--------------|--------------|
|    | X                       | Y            | Z            |
| Mn | 0.067780000             | 0.240306000  | 0.125064000  |
| P  | 2.311951000             | 0.076135000  | 0.387106000  |
| O  | 0.085801000             | -0.153349000 | -2.783771000 |
| C  | 0.071421000             | -0.005802000 | -1.636076000 |
| N  | 0.063859000             | 0.198010000  | 2.227924000  |
| C  | 1.315942000             | 0.635763000  | 2.871344000  |
| C  | -1.128069000            | 0.797706000  | 2.851990000  |
| C  | -2.362844000            | 0.151542000  | 2.237462000  |
| C  | 2.488971000             | -0.085796000 | 2.216461000  |
| H  | -3.279938000            | 0.589302000  | 2.632784000  |
| H  | 2.424282000             | -1.156869000 | 2.429563000  |
| H  | -2.358215000            | -0.913456000 | 2.488107000  |
| P  | -2.199356000            | 0.266972000  | 0.404755000  |
| C  | 0.190042000             | 2.010353000  | -0.000227000 |
| O  | 0.301907000             | 3.157291000  | -0.061373000 |
| H  | 3.450453000             | 0.265956000  | 2.595240000  |
| C  | -3.294352000            | -1.041705000 | -0.267956000 |
| C  | -4.181160000            | -1.778694000 | 0.513755000  |
| C  | -3.234092000            | -1.288991000 | -1.641195000 |
| C  | -4.980549000            | -2.759263000 | -0.064135000 |
| H  | -4.253551000            | -1.607421000 | 1.581568000  |
| C  | -4.035740000            | -2.263460000 | -2.218581000 |
| H  | -2.552935000            | -0.721566000 | -2.266350000 |
| C  | -4.906562000            | -3.007098000 | -1.428446000 |
| H  | -5.655918000            | -3.336234000 | 0.557917000  |
| H  | -3.973272000            | -2.448085000 | -3.285359000 |
| H  | -5.525676000            | -3.776648000 | -1.876145000 |
| C  | -3.170049000            | 1.753377000  | -0.086870000 |
| C  | -4.354394000            | 2.106507000  | 0.563212000  |
| C  | -2.760518000            | 2.498751000  | -1.191927000 |
| C  | -5.098365000            | 3.197095000  | 0.133539000  |
| H  | -4.716046000            | 1.525288000  | 1.404376000  |
| C  | -3.510382000            | 3.584978000  | -1.629888000 |
| H  | -1.849171000            | 2.232602000  | -1.715312000 |
| C  | -4.676548000            | 3.940009000  | -0.964300000 |
| H  | -6.013674000            | 3.462278000  | 0.651390000  |
| H  | -3.177108000            | 4.155271000  | -2.489791000 |
| H  | -5.258185000            | 4.791113000  | -1.301114000 |
| C  | 3.311848000             | -1.305971000 | -0.283744000 |
| C  | 4.656026000             | -1.448951000 | 0.071891000  |
| C  | 2.735379000             | -2.229776000 | -1.152642000 |
| C  | 5.403316000             | -2.507681000 | -0.423660000 |
| H  | 5.124019000             | -0.725566000 | 0.732372000  |
| C  | 3.485759000             | -3.289351000 | -1.652643000 |
| H  | 1.691899000             | -2.129626000 | -1.429257000 |
| C  | 4.817874000             | -3.430042000 | -1.287347000 |
| H  | 6.445025000             | -2.613300000 | -0.141217000 |
| H  | 3.023872000             | -4.004647000 | -2.323766000 |
| H  | 5.402649000             | -4.257323000 | -1.674327000 |
| C  | 3.328807000             | 1.523996000  | -0.094827000 |
| C  | 3.801103000             | 2.460094000  | 0.822176000  |
| C  | 3.558869000             | 1.732700000  | -1.457390000 |
| C  | 4.503416000             | 3.580457000  | 0.387634000  |
| H  | 3.624252000             | 2.331305000  | 1.884126000  |
| C  | 4.261304000             | 2.848004000  | -1.889509000 |
| H  | 3.190464000             | 1.016962000  | -2.186007000 |
| C  | 4.736061000             | 3.775629000  | -0.966785000 |
| H  | 4.864858000             | 4.302027000  | 1.112083000  |
| H  | 4.435765000             | 2.996531000  | -2.949393000 |
| H  | 5.281250000             | 4.649691000  | -1.305361000 |
| H  | -1.118659000            | 0.626987000  | 3.936320000  |
| H  | -1.115695000            | 1.878220000  | 2.679804000  |
| H  | 1.405286000             | 1.720170000  | 2.754892000  |
| H  | 1.288860000             | 0.413824000  | 3.945991000  |
| H  | -0.011389000            | -0.831454000 | 2.425876000  |

|   |              |              |              |
|---|--------------|--------------|--------------|
| H | 0.014851000  | -1.513898000 | 0.455479000  |
| C | -0.079835000 | -2.749098000 | 2.484946000  |
| C | 0.189222000  | -2.718601000 | 1.114542000  |
| H | 1.236182000  | -2.839039000 | 0.848954000  |
| H | 0.737339000  | -2.768799000 | 3.198785000  |
| H | -1.077022000 | -2.959663000 | 2.856438000  |
| S | -0.883362000 | -3.757339000 | 0.082662000  |
| H | -0.994563000 | -2.928448000 | -0.974920000 |

-----

**TS1\_SH**

-----

|    | Coordinates (Angstroms) |              |              |
|----|-------------------------|--------------|--------------|
|    | X                       | Y            | Z            |
| Mn | 0.104629000             | 0.289955000  | 0.024925000  |
| P  | 2.316300000             | -0.083538000 | 0.305358000  |
| O  | 0.269029000             | 0.652768000  | -2.881234000 |
| C  | 0.192515000             | 0.502315000  | -1.735751000 |
| N  | 0.019433000             | -0.254074000 | 2.070567000  |
| C  | 1.269835000             | -0.048876000 | 2.824800000  |
| C  | -1.153323000            | 0.289037000  | 2.778783000  |
| C  | -2.421243000            | -0.063233000 | 2.011680000  |
| C  | 2.421785000             | -0.675301000 | 2.048678000  |
| H  | -3.286358000            | 0.444007000  | 2.441047000  |
| H  | 2.283889000             | -1.759215000 | 2.005094000  |
| H  | -2.594202000            | -1.140075000 | 2.076238000  |
| P  | -2.154567000            | 0.324830000  | 0.223249000  |
| C  | 0.299039000             | 2.032735000  | 0.340433000  |
| O  | 0.438510000             | 3.159966000  | 0.547046000  |
| H  | 3.388250000             | -0.485466000 | 2.519231000  |
| C  | -3.191673000            | -0.905210000 | -0.664649000 |
| C  | -4.287415000            | -1.534473000 | -0.073398000 |
| C  | -2.880472000            | -1.196763000 | -1.993240000 |
| C  | -5.053710000            | -2.441335000 | -0.796061000 |
| H  | -4.547791000            | -1.333387000 | 0.959696000  |
| C  | -3.651412000            | -2.096589000 | -2.718452000 |
| H  | -2.025512000            | -0.726547000 | -2.464546000 |
| C  | -4.738854000            | -2.722779000 | -2.119997000 |
| H  | -5.896818000            | -2.930672000 | -0.320982000 |
| H  | -3.398167000            | -2.312154000 | -3.750622000 |
| H  | -5.337174000            | -3.430558000 | -2.683125000 |
| C  | -3.111277000            | 1.862752000  | -0.103190000 |
| C  | -4.358470000            | 2.098828000  | 0.479868000  |
| C  | -2.609191000            | 2.787118000  | -1.017983000 |
| C  | -5.077930000            | 3.244747000  | 0.169188000  |
| H  | -4.784498000            | 1.383048000  | 1.174947000  |
| C  | -3.332802000            | 3.931268000  | -1.336589000 |
| H  | -1.646999000            | 2.615840000  | -1.486201000 |
| C  | -4.565079000            | 4.164405000  | -0.740338000 |
| H  | -6.043016000            | 3.417011000  | 0.633005000  |
| H  | -2.928562000            | 4.641560000  | -2.049210000 |
| H  | -5.126994000            | 5.059410000  | -0.984173000 |
| C  | 3.259226000             | -1.333270000 | -0.646472000 |
| C  | 4.572477000             | -1.657805000 | -0.294639000 |
| C  | 2.670648000             | -1.965144000 | -1.739246000 |
| C  | 5.277703000             | -2.609153000 | -1.017686000 |
| H  | 5.050423000             | -1.158623000 | 0.542617000  |
| C  | 3.380142000             | -2.915102000 | -2.468248000 |
| H  | 1.653258000             | -1.716184000 | -2.018178000 |
| C  | 4.681102000             | -3.239004000 | -2.107095000 |
| H  | 6.296210000             | -2.855023000 | -0.737904000 |
| H  | 2.913406000             | -3.399405000 | -3.318740000 |
| H  | 5.234342000             | -3.979450000 | -2.674456000 |
| C  | 3.428839000             | 1.371872000  | 0.201857000  |
| C  | 3.917650000             | 2.037344000  | 1.323968000  |
| C  | 3.709822000             | 1.886081000  | -1.067046000 |
| C  | 4.684357000             | 3.190340000  | 1.181638000  |
| H  | 3.703104000             | 1.672104000  | 2.322077000  |
| C  | 4.475697000             | 3.033967000  | -1.208355000 |
| H  | 3.326768000             | 1.386376000  | -1.951556000 |
| C  | 4.965518000             | 3.689791000  | -0.082623000 |
| H  | 5.058282000             | 3.698461000  | 2.063808000  |
| H  | 4.685569000             | 3.422226000  | -2.198847000 |
| H  | 5.558644000             | 4.590872000  | -0.192639000 |
| H  | -1.210200000            | -0.116760000 | 3.797649000  |

|   |              |              |              |
|---|--------------|--------------|--------------|
| H | -1.032241000 | 1.373198000  | 2.859065000  |
| H | 1.419810000  | 1.026978000  | 2.956161000  |
| H | 1.192793000  | -0.502884000 | 3.821108000  |
| H | -0.099436000 | -1.285913000 | 2.004083000  |
| H | -0.104854000 | -1.430846000 | -0.113044000 |
| C | -0.155571000 | -3.223458000 | 1.514076000  |
| C | -0.247293000 | -2.833071000 | 0.177207000  |
| H | 0.588158000  | -3.098020000 | -0.465980000 |
| H | 0.796126000  | -3.556985000 | 1.912859000  |
| H | -1.213564000 | -2.908729000 | -0.317268000 |
| S | -1.581090000 | -3.712885000 | 2.445717000  |
| H | -1.637104000 | -2.761833000 | 3.407922000  |

---

## TS2\_OH

---

|    | Coordinates (Angstroms) |              |              |
|----|-------------------------|--------------|--------------|
|    | X                       | Y            | Z            |
| Mn | -0.005990000            | -0.001068000 | 0.089955000  |
| P  | 2.249258000             | 0.028081000  | 0.365259000  |
| O  | -0.123729000            | -0.512152000 | -2.798712000 |
| C  | -0.061708000            | -0.305364000 | -1.663004000 |
| N  | -0.022431000            | -0.046050000 | 2.196778000  |
| C  | 1.199666000             | 0.453380000  | 2.852245000  |
| C  | -1.232060000            | 0.497779000  | 2.841225000  |
| C  | -2.456834000            | -0.135263000 | 2.197899000  |
| C  | 2.425496000             | -0.163790000 | 2.191074000  |
| H  | -3.393765000            | 0.275695000  | 2.579099000  |
| H  | 2.444630000             | -1.240175000 | 2.384174000  |
| H  | -2.458734000            | -1.210151000 | 2.404489000  |
| P  | -2.285958000            | 0.010658000  | 0.371279000  |
| C  | -0.014123000            | 1.769282000  | -0.108026000 |
| O  | 0.013815000             | 2.913756000  | -0.238819000 |
| H  | 3.352682000             | 0.255373000  | 2.586188000  |
| C  | -3.490920000            | -1.222517000 | -0.253922000 |
| C  | -4.832761000            | -0.906527000 | -0.480930000 |
| C  | -3.056700000            | -2.532760000 | -0.448378000 |
| C  | -5.721976000            | -1.888045000 | -0.900714000 |
| H  | -5.188557000            | 0.107805000  | -0.337782000 |
| C  | -3.949942000            | -3.514373000 | -0.862581000 |
| H  | -2.021577000            | -2.798781000 | -0.265548000 |
| C  | -5.282175000            | -3.193696000 | -1.093318000 |
| H  | -6.761043000            | -1.632429000 | -1.077763000 |
| H  | -3.597631000            | -4.530022000 | -1.006177000 |
| H  | -5.978027000            | -3.957631000 | -1.422844000 |
| C  | -3.081762000            | 1.594653000  | -0.095751000 |
| C  | -3.557553000            | 2.518855000  | 0.830860000  |
| C  | -3.145614000            | 1.905686000  | -1.457312000 |
| C  | -4.096733000            | 3.730045000  | 0.405035000  |
| H  | -3.511404000            | 2.310209000  | 1.893566000  |
| C  | -3.692122000            | 3.107266000  | -1.881666000 |
| H  | -2.767078000            | 1.201048000  | -2.191422000 |
| C  | -4.168889000            | 4.024460000  | -0.949327000 |
| H  | -4.460114000            | 4.442791000  | 1.137280000  |
| H  | -3.740948000            | 3.331716000  | -2.941387000 |
| H  | -4.590675000            | 4.967051000  | -1.280251000 |
| C  | 3.377838000             | -1.246488000 | -0.318601000 |
| C  | 4.685286000             | -1.365123000 | 0.159546000  |
| C  | 2.942679000             | -2.103652000 | -1.326379000 |
| C  | 5.534582000             | -2.336174000 | -0.351703000 |
| H  | 5.045595000             | -0.690928000 | 0.930095000  |
| C  | 3.795609000             | -3.072985000 | -1.844734000 |
| H  | 1.932497000             | -2.012624000 | -1.708545000 |
| C  | 5.089388000             | -3.192953000 | -1.354658000 |
| H  | 6.545496000             | -2.424913000 | 0.030577000  |
| H  | 3.445649000             | -3.736055000 | -2.628032000 |
| H  | 5.754014000             | -3.951186000 | -1.753815000 |
| C  | 3.146759000             | 1.565520000  | -0.075385000 |
| C  | 3.562122000             | 2.503842000  | 0.866300000  |
| C  | 3.347907000             | 1.830333000  | -1.432731000 |
| C  | 4.180575000             | 3.682829000  | 0.459997000  |
| H  | 3.405118000             | 2.331214000  | 1.924997000  |
| C  | 3.968523000             | 3.003087000  | -1.836598000 |
| H  | 3.017283000             | 1.114611000  | -2.179548000 |
| C  | 4.387339000             | 3.933150000  | -0.889599000 |



|   |              |              |              |
|---|--------------|--------------|--------------|
| H | 4.498949000  | 4.405995000  | 1.202765000  |
| H | 4.122400000  | 3.194195000  | -2.892805000 |
| H | 4.868892000  | 4.851913000  | -1.205481000 |
| H | -1.217792000 | 0.281716000  | 3.917410000  |
| H | -1.236045000 | 1.585435000  | 2.715975000  |
| H | 1.217137000  | 1.544312000  | 2.761447000  |
| H | 1.186306000  | 0.206149000  | 3.921657000  |
| H | -0.053714000 | -1.092182000 | 2.378110000  |
| H | 0.165277000  | -1.747583000 | 0.416485000  |
| C | -0.036966000 | -2.999945000 | 2.331121000  |
| C | 0.447489000  | -2.912105000 | 1.017286000  |
| H | 1.535737000  | -2.864330000 | 0.936823000  |
| H | 0.676553000  | -3.120266000 | 3.139301000  |
| H | -1.047658000 | -3.360186000 | 2.499517000  |
| O | -0.110434000 | -3.774684000 | 0.051380000  |
| H | 0.156055000  | -3.455608000 | -0.817378000 |

### TS1\_OH

|    | Coordinates (Angstroms) |              |              |
|----|-------------------------|--------------|--------------|
|    | X                       | Y            | Z            |
| Mn | 0.033726000             | 0.088609000  | 0.054477000  |
| P  | 2.270957000             | -0.045485000 | 0.341458000  |
| O  | 0.058613000             | -0.110466000 | -2.872836000 |
| C  | 0.048176000             | -0.044593000 | -1.716882000 |
| N  | 0.004437000             | -0.123007000 | 2.134228000  |
| C  | 1.228132000             | 0.304438000  | 2.837008000  |
| C  | -1.208858000            | 0.380227000  | 2.805069000  |
| C  | -2.441051000            | -0.174145000 | 2.098715000  |
| C  | 2.432812000             | -0.333459000 | 2.155121000  |
| H  | -3.366253000            | 0.259068000  | 2.484035000  |
| H  | 2.391163000             | -1.418543000 | 2.290995000  |
| H  | -2.492693000            | -1.257520000 | 2.238319000  |
| P  | -2.212753000            | 0.074859000  | 0.286684000  |
| C  | 0.082103000             | 1.863169000  | -0.010146000 |
| O  | 0.112411000             | 3.015468000  | -0.070439000 |
| H  | 3.379057000             | 0.016343000  | 2.572462000  |
| C  | -3.298817000            | -1.188755000 | -0.475025000 |
| C  | -4.661855000            | -1.236368000 | -0.170474000 |
| C  | -2.767206000            | -2.117170000 | -1.366366000 |
| C  | -5.474596000            | -2.205197000 | -0.740738000 |
| H  | -5.092121000            | -0.507307000 | 0.509141000  |
| C  | -3.583691000            | -3.084810000 | -1.944152000 |
| H  | -1.710645000            | -2.082689000 | -1.606088000 |
| C  | -4.935373000            | -3.131087000 | -1.630211000 |
| H  | -6.531047000            | -2.236973000 | -0.497683000 |
| H  | -3.161187000            | -3.801671000 | -2.639540000 |
| H  | -5.572143000            | -3.886187000 | -2.078164000 |
| C  | -3.108901000            | 1.621197000  | -0.127705000 |
| C  | -3.472642000            | 2.564801000  | 0.830633000  |
| C  | -3.347150000            | 1.898745000  | -1.476358000 |
| C  | -4.077810000            | 3.759087000  | 0.450270000  |
| H  | -3.284508000            | 2.383681000  | 1.883131000  |
| C  | -3.952863000            | 3.088091000  | -1.854848000 |
| H  | -3.059824000            | 1.178476000  | -2.236181000 |
| C  | -4.321250000            | 4.021996000  | -0.891019000 |
| H  | -4.356878000            | 4.484765000  | 1.206374000  |
| H  | -4.134648000            | 3.288098000  | -2.905026000 |
| H  | -4.792548000            | 4.952781000  | -1.186696000 |
| C  | 3.323404000             | -1.345108000 | -0.409805000 |
| C  | 4.672842000             | -1.461522000 | -0.064642000 |
| C  | 2.779943000             | -2.228577000 | -1.339585000 |
| C  | 5.459024000             | -2.453869000 | -0.632099000 |
| H  | 5.114291000             | -0.765740000 | 0.642182000  |
| C  | 3.569774000             | -3.220554000 | -1.913355000 |
| H  | 1.734212000             | -2.140183000 | -1.612026000 |
| C  | 4.907352000             | -3.335369000 | -1.558447000 |
| H  | 6.505175000             | -2.538005000 | -0.358857000 |
| H  | 3.137823000             | -3.901837000 | -2.637996000 |
| H  | 5.523789000             | -4.108143000 | -2.004618000 |
| C  | 3.251267000             | 1.461856000  | -0.021755000 |
| C  | 3.663571000             | 2.356917000  | 0.962904000  |
| C  | 3.505067000             | 1.764348000  | -1.362260000 |
| C  | 4.330546000             | 3.528405000  | 0.615848000  |

|   |              |              |              |
|---|--------------|--------------|--------------|
| H | 3.466326000  | 2.156401000  | 2.010185000  |
| C | 4.172878000  | 2.930125000  | -1.707339000 |
| H | 3.179069000  | 1.082558000  | -2.141921000 |
| C | 4.588014000  | 3.816268000  | -0.717603000 |
| H | 4.645443000  | 4.217737000  | 1.391691000  |
| H | 4.364950000  | 3.150147000  | -2.751636000 |
| H | 5.105482000  | 4.730374000  | -0.987023000 |
| H | -1.211571000 | 0.079443000  | 3.862008000  |
| H | -1.194378000 | 1.474335000  | 2.772360000  |
| H | 1.289029000  | 1.396792000  | 2.807597000  |
| H | 1.187573000  | -0.002836000 | 3.890983000  |
| H | -0.014908000 | -1.189743000 | 2.261046000  |
| H | -0.034198000 | -1.699184000 | 0.259298000  |
| C | -0.110448000 | -2.996150000 | 2.202812000  |
| C | 0.021502000  | -2.934873000 | 0.808059000  |
| H | 0.995584000  | -3.216222000 | 0.415276000  |
| H | 0.716582000  | -3.370054000 | 2.803183000  |
| H | -0.802033000 | -3.339668000 | 0.218833000  |
| O | -1.398889000 | -3.334540000 | 2.695475000  |
| H | -1.491678000 | -2.955365000 | 3.569350000  |

### TS2\_CHO

|    | Coordinates (Angstroms) |              |              |
|----|-------------------------|--------------|--------------|
|    | X                       | Y            | Z            |
| Mn | 0.031503000             | 0.157206000  | 0.126416000  |
| P  | 2.280805000             | 0.052046000  | 0.389924000  |
| O  | 0.052947000             | -0.307264000 | -2.772784000 |
| C  | 0.037765000             | -0.141660000 | -1.629186000 |
| N  | 0.022771000             | 0.177815000  | 2.220303000  |
| C  | 1.272840000             | 0.628986000  | 2.861078000  |
| C  | -1.160851000            | 0.798301000  | 2.843482000  |
| C  | -2.414575000            | 0.187045000  | 2.230043000  |
| C  | 2.454077000             | -0.090137000 | 2.219587000  |
| H  | -3.324213000            | 0.672576000  | 2.587942000  |
| H  | 2.397645000             | -1.159494000 | 2.443116000  |
| H  | -2.471074000            | -0.869834000 | 2.507919000  |
| P  | -2.225236000            | 0.219383000  | 0.396911000  |
| C  | 0.090639000             | 1.918030000  | -0.114258000 |
| O  | 0.135721000             | 3.058288000  | -0.275936000 |
| H  | 3.411497000             | 0.273712000  | 2.597741000  |
| C  | -3.372901000            | -1.077079000 | -0.199780000 |
| C  | -4.637320000            | -1.237858000 | 0.373840000  |
| C  | -2.993165000            | -1.906017000 | -1.252589000 |
| C  | -5.497440000            | -2.222840000 | -0.090320000 |
| H  | -4.955837000            | -0.589584000 | 1.183882000  |
| C  | -3.859531000            | -2.886860000 | -1.725053000 |
| H  | -2.010946000            | -1.801133000 | -1.697259000 |
| C  | -5.108818000            | -3.048954000 | -1.142035000 |
| H  | -6.473445000            | -2.345870000 | 0.366144000  |
| H  | -3.546509000            | -3.532258000 | -2.537716000 |
| H  | -5.782130000            | -3.818475000 | -1.503351000 |
| C  | -3.074889000            | 1.742580000  | -0.173180000 |
| C  | -3.434533000            | 2.778895000  | 0.685681000  |
| C  | -3.284097000            | 1.896014000  | -1.546093000 |
| C  | -4.005688000            | 3.944232000  | 0.182688000  |
| H  | -3.269298000            | 2.696018000  | 1.753966000  |
| C  | -3.855243000            | 3.056909000  | -2.046410000 |
| H  | -2.998870000            | 1.103066000  | -2.230549000 |
| C  | -4.218948000            | 4.084990000  | -1.181714000 |
| H  | -4.281489000            | 4.742907000  | 0.862608000  |
| H  | -4.013689000            | 3.162217000  | -3.113907000 |
| H  | -4.662609000            | 4.993609000  | -1.573301000 |
| C  | 3.314168000             | -1.308549000 | -0.270151000 |
| C  | 4.679001000             | -1.374923000 | 0.025575000  |
| C  | 2.739728000             | -2.296292000 | -1.067133000 |
| C  | 5.450091000             | -2.421643000 | -0.458720000 |
| H  | 5.143910000             | -0.599897000 | 0.627048000  |
| C  | 3.513845000             | -3.345117000 | -1.553883000 |
| H  | 1.681501000             | -2.256798000 | -1.298176000 |
| C  | 4.866888000             | -3.409003000 | -1.249463000 |
| H  | 6.508147000             | -2.467130000 | -0.225030000 |
| H  | 3.052239000             | -4.111190000 | -2.166437000 |
| H  | 5.470713000             | -4.226665000 | -1.627726000 |

|   |              |              |              |
|---|--------------|--------------|--------------|
| C | 3.251802000  | 1.527556000  | -0.100616000 |
| C | 3.709646000  | 2.475410000  | 0.811827000  |
| C | 3.461583000  | 1.742377000  | -1.465575000 |
| C | 4.376104000  | 3.614697000  | 0.369899000  |
| H | 3.550105000  | 2.340522000  | 1.875689000  |
| C | 4.128961000  | 2.876159000  | -1.904849000 |
| H | 3.103060000  | 1.017606000  | -2.190221000 |
| C | 4.588423000  | 3.816196000  | -0.986916000 |
| H | 4.726903000  | 4.345124000  | 1.090710000  |
| H | 4.287664000  | 3.029553000  | -2.966456000 |
| H | 5.105771000  | 4.704791000  | -1.331262000 |
| H | -1.153225000 | 0.625447000  | 3.927660000  |
| H | -1.121072000 | 1.878865000  | 2.674090000  |
| H | 1.356795000  | 1.712808000  | 2.733612000  |
| H | 1.242986000  | 0.417537000  | 3.937959000  |
| H | -0.055984000 | -0.855710000 | 2.464988000  |
| H | 0.002711000  | -1.612121000 | 0.507130000  |
| C | -0.123462000 | -2.679139000 | 2.602061000  |
| C | 0.135404000  | -2.757746000 | 1.212304000  |
| H | 1.162467000  | -2.969760000 | 0.920614000  |
| H | 0.690733000  | -2.773363000 | 3.311568000  |
| H | -1.122702000 | -2.883290000 | 2.977286000  |
| C | -0.830397000 | -3.586993000 | 0.435968000  |
| H | -1.876732000 | -3.542718000 | 0.800082000  |
| O | -0.532439000 | -4.292619000 | -0.497787000 |

### TS1\_CHO

| Coordinates (Angstroms) |              |              |              |
|-------------------------|--------------|--------------|--------------|
|                         | X            | Y            | Z            |
| Mn                      | -0.072735000 | 0.278260000  | 0.018575000  |
| P                       | 2.162945000  | 0.259068000  | 0.250101000  |
| O                       | -0.103377000 | 0.468775000  | -2.904862000 |
| C                       | -0.095688000 | 0.395589000  | -1.749816000 |
| N                       | -0.023958000 | -0.075570000 | 2.161863000  |
| C                       | 1.162165000  | 0.514697000  | 2.801488000  |
| C                       | -1.277529000 | 0.294885000  | 2.838058000  |
| C                       | -2.435703000 | -0.392093000 | 2.123347000  |
| C                       | 2.413395000  | 0.037429000  | 2.072783000  |
| H                       | -3.402045000 | -0.108328000 | 2.544735000  |
| H                       | 2.546971000  | -1.035052000 | 2.239425000  |
| H                       | -2.336727000 | -1.476605000 | 2.232793000  |
| P                       | -2.284992000 | -0.028611000 | 0.317180000  |
| C                       | -0.197340000 | 2.054837000  | 0.184705000  |
| O                       | -0.280306000 | 3.204945000  | 0.247233000  |
| H                       | 3.308787000  | 0.541944000  | 2.441341000  |
| C                       | -3.213765000 | -1.388936000 | -0.488742000 |
| C                       | -4.517711000 | -1.706115000 | -0.097750000 |
| C                       | -2.620187000 | -2.107892000 | -1.523048000 |
| C                       | -5.206935000 | -2.735363000 | -0.723723000 |
| H                       | -5.000610000 | -1.141230000 | 0.693686000  |
| C                       | -3.313860000 | -3.134277000 | -2.156913000 |
| H                       | -1.608600000 | -1.863932000 | -1.825622000 |
| C                       | -4.605271000 | -3.450303000 | -1.756225000 |
| H                       | -6.217600000 | -2.975951000 | -0.412480000 |
| H                       | -2.843551000 | -3.684128000 | -2.964726000 |
| H                       | -5.146110000 | -4.251799000 | -2.247552000 |
| C                       | -3.396156000 | 1.398410000  | 0.004881000  |
| C                       | -3.843682000 | 2.247361000  | 1.015019000  |
| C                       | -3.709675000 | 1.702001000  | -1.322551000 |
| C                       | -4.600697000 | 3.373769000  | 0.705826000  |
| H                       | -3.604237000 | 2.046827000  | 2.053435000  |
| C                       | -4.466617000 | 2.823188000  | -1.630222000 |
| H                       | -3.360415000 | 1.056052000  | -2.122307000 |
| C                       | -4.914263000 | 3.663519000  | -0.615238000 |
| H                       | -4.940757000 | 4.027543000  | 1.501649000  |
| H                       | -4.702142000 | 3.044413000  | -2.665358000 |
| H                       | -5.500350000 | 4.543693000  | -0.855694000 |
| C                       | 3.202299000  | -1.054885000 | -0.495779000 |
| C                       | 4.469127000  | -1.347553000 | 0.014055000  |
| C                       | 2.730624000  | -1.772096000 | -1.592720000 |
| C                       | 5.240420000  | -2.353896000 | -0.552043000 |
| H                       | 4.860030000  | -0.788734000 | 0.858389000  |
| C                       | 3.507743000  | -2.771509000 | -2.169208000 |

|   |              |              |              |
|---|--------------|--------------|--------------|
| H | 1.744098000  | -1.559510000 | -1.987217000 |
| C | 4.760073000  | -3.068119000 | -1.645759000 |
| H | 6.219035000  | -2.578165000 | -0.141988000 |
| H | 3.129962000  | -3.321409000 | -3.024219000 |
| H | 5.363410000  | -3.852676000 | -2.089337000 |
| C | 3.120900000  | 1.766306000  | -0.181030000 |
| C | 3.276830000  | 2.810186000  | 0.730927000  |
| C | 3.615423000  | 1.922283000  | -1.477397000 |
| C | 3.930593000  | 3.979916000  | 0.360858000  |
| H | 2.883972000  | 2.723762000  | 1.738357000  |
| C | 4.267091000  | 3.091866000  | -1.847207000 |
| H | 3.498256000  | 1.124685000  | -2.204045000 |
| C | 4.428938000  | 4.122935000  | -0.928014000 |
| H | 4.045869000  | 4.781397000  | 1.082386000  |
| H | 4.650284000  | 3.197621000  | -2.856258000 |
| H | 4.937984000  | 5.035795000  | -1.217001000 |
| H | -1.250997000 | -0.002677000 | 3.893646000  |
| H | -1.381088000 | 1.383444000  | 2.794467000  |
| H | 1.066387000  | 1.603103000  | 2.744255000  |
| H | 1.213856000  | 0.233837000  | 3.860850000  |
| H | 0.061791000  | -1.088395000 | 2.275988000  |
| H | 0.077124000  | -1.376290000 | -0.096504000 |
| C | 1.218423000  | -3.493272000 | 1.020394000  |
| C | 1.242060000  | -3.439552000 | 2.452013000  |
| O | 0.423817000  | -2.853614000 | 3.163774000  |
| C | 0.121762000  | -3.089577000 | 0.309840000  |
| H | -0.824827000 | -2.942325000 | 0.816746000  |
| H | 0.061454000  | -3.280207000 | -0.754222000 |
| H | 2.081085000  | -3.974251000 | 2.937939000  |
| H | 2.108684000  | -3.850088000 | 0.513793000  |

-----  
**TS2\_CH=CH<sub>2</sub>**  
 -----

|    | Coordinates (Angstroms) |              |              |
|----|-------------------------|--------------|--------------|
|    | X                       | Y            | Z            |
| Mn | 0.031173000             | 0.158374000  | 0.134580000  |
| P  | 2.275231000             | 0.074357000  | 0.398443000  |
| O  | 0.042530000             | -0.377731000 | -2.751423000 |
| C  | 0.032852000             | -0.181897000 | -1.611061000 |
| N  | 0.023008000             | 0.207783000  | 2.223160000  |
| C  | 1.266638000             | 0.677067000  | 2.860993000  |
| C  | -1.166403000            | 0.815224000  | 2.845206000  |
| C  | -2.412401000            | 0.179942000  | 2.239511000  |
| C  | 2.455625000             | -0.038366000 | 2.228815000  |
| H  | -3.328769000            | 0.653650000  | 2.596247000  |
| H  | 2.409601000             | -1.104696000 | 2.467925000  |
| H  | -2.448692000            | -0.876010000 | 2.524400000  |
| P  | -2.225152000            | 0.202060000  | 0.407306000  |
| C  | 0.074996000             | 1.915114000  | -0.134063000 |
| O  | 0.115904000             | 3.053840000  | -0.311707000 |
| H  | 3.409735000             | 0.341477000  | 2.599667000  |
| C  | -3.384518000            | -1.087110000 | -0.187605000 |
| C  | -4.636956000            | -1.259030000 | 0.407940000  |
| C  | -3.032018000            | -1.887888000 | -1.271434000 |
| C  | -5.514017000            | -2.224775000 | -0.065817000 |
| H  | -4.935047000            | -0.633957000 | 1.243539000  |
| C  | -3.916788000            | -2.846111000 | -1.755593000 |
| H  | -2.055977000            | -1.781178000 | -1.728072000 |
| C  | -5.155019000            | -3.018950000 | -1.151547000 |
| H  | -6.480517000            | -2.355450000 | 0.408375000  |
| H  | -3.629188000            | -3.464291000 | -2.598833000 |
| H  | -5.842477000            | -3.770887000 | -1.523386000 |
| C  | -3.079353000            | 1.722858000  | -0.167899000 |
| C  | -3.452231000            | 2.756721000  | 0.688220000  |
| C  | -3.280746000            | 1.875856000  | -1.542079000 |
| C  | -4.027807000            | 3.918442000  | 0.181610000  |
| H  | -3.293655000            | 2.674856000  | 1.757545000  |
| C  | -3.856539000            | 3.032701000  | -2.046290000 |
| H  | -2.984721000            | 1.085328000  | -2.224771000 |
| C  | -4.233181000            | 4.058247000  | -1.184056000 |
| H  | -4.313268000            | 4.715114000  | 0.859959000  |
| H  | -4.008506000            | 3.137087000  | -3.114865000 |
| H  | -4.680272000            | 4.964003000  | -1.578448000 |
| C  | 3.314699000             | -1.292073000 | -0.244122000 |

|   |              |              |              |
|---|--------------|--------------|--------------|
| C | 4.673870000  | -1.365047000 | 0.073374000  |
| C | 2.751736000  | -2.271731000 | -1.059260000 |
| C | 5.451756000  | -2.408422000 | -0.407954000 |
| H | 5.129786000  | -0.597448000 | 0.691005000  |
| C | 3.533795000  | -3.313793000 | -1.547966000 |
| H | 1.696313000  | -2.226325000 | -1.303461000 |
| C | 4.881712000  | -3.384230000 | -1.221631000 |
| H | 6.505320000  | -2.458786000 | -0.155857000 |
| H | 3.086983000  | -4.068887000 | -2.185381000 |
| H | 5.491363000  | -4.196752000 | -1.601583000 |
| C | 3.243612000  | 1.542394000  | -0.121154000 |
| C | 3.699735000  | 2.508737000  | 0.772561000  |
| C | 3.450019000  | 1.733123000  | -1.490213000 |
| C | 4.361648000  | 3.641827000  | 0.308367000  |
| H | 3.541131000  | 2.393456000  | 1.838880000  |
| C | 4.112711000  | 2.860723000  | -1.951904000 |
| H | 3.090952000  | 0.994653000  | -2.200655000 |
| C | 4.571051000  | 3.818961000  | -1.052310000 |
| H | 4.710857000  | 4.386672000  | 1.015085000  |
| H | 4.268143000  | 2.995709000  | -3.016525000 |
| H | 5.084356000  | 4.702964000  | -1.414145000 |
| H | -1.153936000 | 0.647094000  | 3.930378000  |
| H | -1.145442000 | 1.895957000  | 2.671535000  |
| H | 1.343209000  | 1.760844000  | 2.725960000  |
| H | 1.237696000  | 0.473370000  | 3.939692000  |
| H | -0.044191000 | -0.834503000 | 2.480259000  |
| H | 0.043169000  | -1.590209000 | 0.558606000  |
| C | -0.073756000 | -2.608869000 | 2.647375000  |
| C | 0.164239000  | -2.747807000 | 1.255786000  |
| H | 1.203364000  | -2.934437000 | 0.984220000  |
| H | 0.758929000  | -2.679086000 | 3.340188000  |
| H | -1.051009000 | -2.865553000 | 3.048054000  |
| C | -0.777841000 | -3.577590000 | 0.458571000  |
| H | -1.831500000 | -3.464683000 | 0.704681000  |
| C | -0.412811000 | -4.427083000 | -0.496636000 |
| H | 0.631901000  | -4.568755000 | -0.760876000 |
| H | -1.144509000 | -5.022266000 | -1.033553000 |

-----

**TS1\_CH=CH<sub>2</sub>**

-----

|    | Coordinates (Angstroms) |              |              |
|----|-------------------------|--------------|--------------|
|    | X                       | Y            | Z            |
| Mn | 0.109414000             | 0.223953000  | -0.012226000 |
| P  | 2.306290000             | -0.194285000 | 0.287656000  |
| O  | 0.128810000             | 0.419657000  | -2.938706000 |
| C  | 0.127555000             | 0.335445000  | -1.784825000 |
| N  | -0.008195000            | -0.199598000 | 2.069010000  |
| C  | 1.266292000             | -0.105534000 | 2.804617000  |
| C  | -1.102019000            | 0.509128000  | 2.758382000  |
| C  | -2.415389000            | 0.234142000  | 2.036903000  |
| C  | 2.354234000             | -0.827530000 | 2.019083000  |
| H  | -3.209459000            | 0.895482000  | 2.388685000  |
| H  | 2.120106000             | -1.894476000 | 1.955218000  |
| H  | -2.723908000            | -0.795500000 | 2.234436000  |
| P  | -2.136815000            | 0.375133000  | 0.209142000  |
| C  | 0.330696000             | 1.982416000  | 0.168569000  |
| O  | 0.498156000             | 3.120476000  | 0.265415000  |
| H  | 3.332684000             | -0.736367000 | 2.494338000  |
| C  | -3.276694000            | -0.873737000 | -0.496505000 |
| C  | -4.553376000            | -1.063436000 | 0.037738000  |
| C  | -2.870084000            | -1.650509000 | -1.578833000 |
| C  | -5.400369000            | -2.026971000 | -0.491128000 |
| H  | -4.889237000            | -0.459410000 | 0.874389000  |
| C  | -3.723165000            | -2.609453000 | -2.117038000 |
| H  | -1.878306000            | -1.512643000 | -1.994525000 |
| C  | -4.985077000            | -2.802745000 | -1.569953000 |
| H  | -6.385272000            | -2.173772000 | -0.061833000 |
| H  | -3.396119000            | -3.210169000 | -2.958545000 |
| H  | -5.647000000            | -3.556740000 | -1.981633000 |
| C  | -2.948505000            | 1.945701000  | -0.280769000 |
| C  | -2.923603000            | 3.053736000  | 0.567056000  |
| C  | -3.509927000            | 2.078387000  | -1.551550000 |
| C  | -3.466856000            | 4.266076000  | 0.159612000  |
| H  | -2.471381000            | 2.982259000  | 1.550836000  |

|   |              |              |              |
|---|--------------|--------------|--------------|
| C | -4.049608000 | 3.291925000  | -1.959367000 |
| H | -3.533171000 | 1.230423000  | -2.228059000 |
| C | -4.032831000 | 4.387766000  | -1.103895000 |
| H | -3.443026000 | 5.117627000  | 0.830793000  |
| H | -4.486453000 | 3.380367000  | -2.948000000 |
| H | -4.456391000 | 5.333808000  | -1.422466000 |
| C | 3.233411000  | -1.453077000 | -0.670975000 |
| C | 4.564815000  | -1.748413000 | -0.365436000 |
| C | 2.609824000  | -2.126741000 | -1.718763000 |
| C | 5.253857000  | -2.711700000 | -1.088711000 |
| H | 5.070527000  | -1.215366000 | 0.433727000  |
| C | 3.302471000  | -3.088620000 | -2.447777000 |
| H | 1.576760000  | -1.902414000 | -1.958397000 |
| C | 4.622451000  | -3.382783000 | -2.132611000 |
| H | 6.287135000  | -2.933573000 | -0.845477000 |
| H | 2.808573000  | -3.604610000 | -3.263644000 |
| H | 5.163111000  | -4.131770000 | -2.700934000 |
| C | 3.470302000  | 1.223705000  | 0.242848000  |
| C | 4.084563000  | 1.755122000  | 1.374327000  |
| C | 3.685804000  | 1.834395000  | -0.995840000 |
| C | 4.909499000  | 2.871907000  | 1.270108000  |
| H | 3.927813000  | 1.309251000  | 2.349998000  |
| C | 4.513634000  | 2.942165000  | -1.100642000 |
| H | 3.201066000  | 1.440792000  | -1.884373000 |
| C | 5.127259000  | 3.464912000  | 0.034228000  |
| H | 5.379566000  | 3.277682000  | 2.159324000  |
| H | 4.673614000  | 3.404951000  | -2.068097000 |
| H | 5.769144000  | 4.335256000  | -0.046057000 |
| H | -1.176443000 | 0.179986000  | 3.802528000  |
| H | -0.864552000 | 1.576939000  | 2.757231000  |
| H | 1.509897000  | 0.954734000  | 2.924522000  |
| H | 1.162518000  | -0.542758000 | 3.805744000  |
| H | -0.264219000 | -1.200827000 | 2.058092000  |
| H | -0.048358000 | -1.513404000 | -0.068277000 |
| C | -0.562694000 | -3.181065000 | 1.622982000  |
| C | -0.155673000 | -2.913223000 | 0.314488000  |
| H | 0.872346000  | -3.140195000 | 0.046880000  |
| H | 0.188240000  | -3.317454000 | 2.399499000  |
| H | -0.864240000 | -3.125008000 | -0.483255000 |
| C | -1.946459000 | -3.309976000 | 1.987737000  |
| H | -2.652844000 | -3.234501000 | 1.158222000  |
| C | -2.458270000 | -3.508426000 | 3.219011000  |
| H | -3.525700000 | -3.622901000 | 3.372180000  |
| H | -1.819276000 | -3.589054000 | 4.095437000  |

TS2\_C≡CH

|    | Coordinates (Angstroms) |              |              |
|----|-------------------------|--------------|--------------|
|    | X                       | Y            | Z            |
| Mn | 0.071505000             | 0.121399000  | 0.083327000  |
| P  | 2.316036000             | 0.124366000  | 0.396429000  |
| O  | 0.240762000             | -0.230697000 | -2.825377000 |
| C  | 0.157919000             | -0.109080000 | -1.677669000 |
| N  | 0.056684000             | 0.063537000  | 2.172147000  |
| C  | 1.186895000             | 0.752974000  | 2.821117000  |
| C  | -1.221812000            | 0.383139000  | 2.832621000  |
| C  | -2.350496000            | -0.348907000 | 2.117031000  |
| C  | 2.495924000             | 0.234665000  | 2.235006000  |
| H  | -3.324684000            | -0.113063000 | 2.549158000  |
| H  | 2.670872000             | -0.784295000 | 2.588808000  |
| H  | -2.204531000            | -1.430494000 | 2.202592000  |
| P  | -2.195901000            | 0.039941000  | 0.327654000  |
| C  | 0.052977000             | 1.890529000  | -0.081360000 |
| O  | 0.042392000             | 3.039075000  | -0.187582000 |
| H  | 3.346786000             | 0.846708000  | 2.540170000  |
| C  | -3.340673000            | -1.114360000 | -0.518602000 |
| C  | -4.588002000            | -1.414221000 | 0.032445000  |
| C  | -2.987063000            | -1.671629000 | -1.744654000 |
| C  | -5.459461000            | -2.270842000 | -0.626263000 |
| H  | -4.886735000            | -0.977467000 | 0.979653000  |
| C  | -3.866314000            | -2.516285000 | -2.413456000 |
| H  | -2.015199000            | -1.464351000 | -2.174439000 |
| C  | -5.100043000            | -2.821863000 | -1.853042000 |
| H  | -6.422880000            | -2.502878000 | -0.185584000 |

|   |              |              |              |
|---|--------------|--------------|--------------|
| H | -3.578896000 | -2.945203000 | -3.366985000 |
| H | -5.783287000 | -3.486079000 | -2.371178000 |
| C | -3.102113000 | 1.622883000  | 0.087303000  |
| C | -3.755150000 | 2.305414000  | 1.111065000  |
| C | -3.101456000 | 2.172439000  | -1.197571000 |
| C | -4.400527000 | 3.512158000  | 0.855687000  |
| H | -3.769328000 | 1.908433000  | 2.119488000  |
| C | -3.751173000 | 3.370538000  | -1.454304000 |
| H | -2.581767000 | 1.662822000  | -2.003665000 |
| C | -4.402250000 | 4.045392000  | -0.425822000 |
| H | -4.902018000 | 4.033502000  | 1.663934000  |
| H | -3.741268000 | 3.784739000  | -2.456376000 |
| H | -4.903783000 | 4.986336000  | -0.623463000 |
| C | 3.379371000  | -1.291687000 | -0.076510000 |
| C | 4.643779000  | -1.465882000 | 0.492285000  |
| C | 2.935985000  | -2.196540000 | -1.038611000 |
| C | 5.442818000  | -2.535114000 | 0.112244000  |
| H | 5.010967000  | -0.760200000 | 1.230703000  |
| C | 3.740568000  | -3.263785000 | -1.426297000 |
| H | 1.953926000  | -2.072327000 | -1.480674000 |
| C | 4.991682000  | -3.435580000 | -0.848953000 |
| H | 6.420262000  | -2.665416000 | 0.563526000  |
| H | 3.383779000  | -3.962751000 | -2.174412000 |
| H | 5.617558000  | -4.269996000 | -1.145951000 |
| C | 3.271399000  | 1.537649000  | -0.276459000 |
| C | 3.361476000  | 2.742208000  | 0.420674000  |
| C | 3.831707000  | 1.447851000  | -1.551903000 |
| C | 4.013348000  | 3.833998000  | -0.140708000 |
| H | 2.913430000  | 2.842427000  | 1.403677000  |
| C | 4.480935000  | 2.539902000  | -2.112748000 |
| H | 3.768275000  | 0.519492000  | -2.109987000 |
| C | 4.575171000  | 3.734725000  | -1.407784000 |
| H | 4.075917000  | 4.765455000  | 0.411098000  |
| H | 4.915653000  | 2.455345000  | -3.102603000 |
| H | 5.080644000  | 4.587718000  | -1.846867000 |
| H | -1.185500000 | 0.082686000  | 3.887859000  |
| H | -1.373997000 | 1.466864000  | 2.796552000  |
| H | 1.076862000  | 1.829650000  | 2.660245000  |
| H | 1.170560000  | 0.572563000  | 3.904169000  |
| H | 0.212711000  | -0.974314000 | 2.374435000  |
| H | 0.097307000  | -1.652737000 | 0.400951000  |
| C | 0.447542000  | -2.755105000 | 2.469923000  |
| C | 0.248897000  | -2.861214000 | 1.074970000  |
| H | 1.117136000  | -3.152720000 | 0.487358000  |
| H | 1.457516000  | -2.796971000 | 2.862918000  |
| H | -0.360760000 | -2.999139000 | 3.150232000  |
| C | -0.960515000 | -3.522409000 | 0.629442000  |
| C | -1.976100000 | -4.067048000 | 0.288873000  |
| H | -2.878673000 | -4.535185000 | -0.028947000 |

-----

**TS1\_C=CH**

-----

|    | Coordinates (Angstroms) |              |              |
|----|-------------------------|--------------|--------------|
|    | X                       | Y            | Z            |
| Mn | 0.104395000             | 0.207653000  | 0.021314000  |
| P  | 2.304391000             | -0.177508000 | 0.325626000  |
| O  | 0.106541000             | 0.283891000  | -2.909946000 |
| C  | 0.113193000             | 0.248875000  | -1.753607000 |
| N  | 0.002805000             | -0.119283000 | 2.126047000  |
| C  | 1.279205000             | 0.050406000  | 2.843524000  |
| C  | -1.107888000            | 0.594915000  | 2.781216000  |
| C  | -2.413066000            | 0.252886000  | 2.073504000  |
| C  | 2.378348000             | -0.694539000 | 2.095494000  |
| H  | -3.228494000            | 0.897260000  | 2.407847000  |
| H  | 2.169117000             | -1.768547000 | 2.103281000  |
| H  | -2.688525000            | -0.781925000 | 2.294096000  |
| P  | -2.142318000            | 0.345015000  | 0.241996000  |
| C  | 0.312327000             | 1.975362000  | 0.130351000  |
| O  | 0.471894000             | 3.117796000  | 0.178070000  |
| H  | 3.357399000             | -0.551809000 | 2.556764000  |
| C  | -3.282488000            | -0.923964000 | -0.423501000 |
| C  | -4.582011000            | -1.047898000 | 0.073243000  |
| C  | -2.852993000            | -1.785299000 | -1.429119000 |
| C  | -5.430098000            | -2.030113000 | -0.416619000 |

|   |              |              |              |
|---|--------------|--------------|--------------|
| H | -4.934185000 | -0.374239000 | 0.847922000  |
| C | -3.706308000 | -2.765329000 | -1.927688000 |
| H | -1.844478000 | -1.694190000 | -1.816476000 |
| C | -4.991240000 | -2.892751000 | -1.417652000 |
| H | -6.434224000 | -2.125398000 | -0.017894000 |
| H | -3.361384000 | -3.434554000 | -2.708155000 |
| H | -5.653821000 | -3.662419000 | -1.798250000 |
| C | -2.958671000 | 1.901044000  | -0.286124000 |
| C | -2.952664000 | 3.025784000  | 0.539588000  |
| C | -3.500552000 | 2.006376000  | -1.568132000 |
| C | -3.493444000 | 4.227954000  | 0.099560000  |
| H | -2.516731000 | 2.975972000  | 1.531954000  |
| C | -4.038307000 | 3.209302000  | -2.008473000 |
| H | -3.509363000 | 1.144506000  | -2.227384000 |
| C | -4.038912000 | 4.322450000  | -1.175101000 |
| H | -3.483079000 | 5.093041000  | 0.753629000  |
| H | -4.459665000 | 3.276297000  | -3.005525000 |
| H | -4.459922000 | 5.260369000  | -1.520036000 |
| C | 3.225373000  | -1.495285000 | -0.557572000 |
| C | 4.546182000  | -1.799602000 | -0.216652000 |
| C | 2.607430000  | -2.203151000 | -1.585839000 |
| C | 5.229408000  | -2.805782000 | -0.885223000 |
| H | 5.047795000  | -1.241469000 | 0.567954000  |
| C | 3.294484000  | -3.207431000 | -2.260875000 |
| H | 1.581727000  | -1.973406000 | -1.850245000 |
| C | 4.603402000  | -3.510584000 | -1.910092000 |
| H | 6.254002000  | -3.035502000 | -0.614067000 |
| H | 2.804471000  | -3.750226000 | -3.061547000 |
| H | 5.138963000  | -4.294353000 | -2.434667000 |
| C | 3.463992000  | 1.235944000  | 0.168563000  |
| C | 4.057467000  | 1.873794000  | 1.255351000  |
| C | 3.691005000  | 1.735480000  | -1.117023000 |
| C | 4.875075000  | 2.983885000  | 1.060905000  |
| H | 3.888669000  | 1.518467000  | 2.265640000  |
| C | 4.510018000  | 2.837645000  | -1.310975000 |
| H | 3.221732000  | 1.259470000  | -1.972915000 |
| C | 5.105038000  | 3.465643000  | -0.220333000 |
| H | 5.330385000  | 3.471351000  | 1.916137000  |
| H | 4.678218000  | 3.213699000  | -2.314009000 |
| H | 5.740802000  | 4.331095000  | -0.370920000 |
| H | -1.173458000 | 0.319731000  | 3.841573000  |
| H | -0.895599000 | 1.666413000  | 2.723923000  |
| H | 1.498277000  | 1.121570000  | 2.892395000  |
| H | 1.194148000  | -0.323454000 | 3.871783000  |
| H | -0.224644000 | -1.123300000 | 2.164610000  |
| H | -0.039023000 | -1.503192000 | 0.021546000  |
| C | -0.488352000 | -3.183544000 | 1.811722000  |
| C | -0.099437000 | -2.966641000 | 0.498416000  |
| H | 0.940122000  | -3.141514000 | 0.242924000  |
| H | 0.258476000  | -3.284041000 | 2.593501000  |
| H | -0.805652000 | -3.198256000 | -0.291923000 |
| C | -1.845658000 | -3.329626000 | 2.176794000  |
| C | -3.015652000 | -3.439687000 | 2.467096000  |
| H | -4.045385000 | -3.569008000 | 2.703684000  |

## TS2\_Ph-NO<sub>2</sub>

|    | Coordinates (Angstroms) |              |              |
|----|-------------------------|--------------|--------------|
|    | X                       | Y            | Z            |
| Mn | 0.823765000             | 0.432424000  | 0.155972000  |
| P  | 2.755335000             | -0.737783000 | 0.370286000  |
| O  | 0.362931000             | -0.300751000 | -2.648394000 |
| C  | 0.529967000             | -0.015763000 | -1.539237000 |
| N  | 1.015020000             | 0.636683000  | 2.228931000  |
| C  | 2.390961000             | 0.556946000  | 2.754586000  |
| C  | 0.267066000             | 1.745020000  | 2.848320000  |
| C  | -1.162359000            | 1.737028000  | 2.319150000  |
| C  | 3.074925000             | -0.681178000 | 2.186454000  |
| H  | -1.744329000            | 2.575508000  | 2.705914000  |
| H  | 2.608973000             | -1.578228000 | 2.602580000  |
| H  | -1.658879000            | 0.813235000  | 2.632424000  |
| P  | -1.071046000            | 1.663622000  | 0.484267000  |
| C  | 1.736054000             | 1.888638000  | -0.308243000 |
| O  | 2.332425000             | 2.826186000  | -0.613424000 |



|   |              |              |              |
|---|--------------|--------------|--------------|
| H | 4.136959000  | -0.714295000 | 2.437339000  |
| C | -2.764038000 | 1.240169000  | -0.073964000 |
| C | -3.889911000 | 1.715565000  | 0.603764000  |
| C | -2.935816000 | 0.525344000  | -1.257069000 |
| C | -5.162724000 | 1.475493000  | 0.105344000  |
| H | -3.777736000 | 2.280634000  | 1.523188000  |
| C | -4.210874000 | 0.306439000  | -1.768625000 |
| H | -2.075520000 | 0.130629000  | -1.783287000 |
| C | -5.325400000 | 0.778452000  | -1.088559000 |
| H | -6.030969000 | 1.840894000  | 0.642712000  |
| H | -4.330896000 | -0.244818000 | -2.694669000 |
| H | -6.319425000 | 0.599302000  | -1.482732000 |
| C | -0.986985000 | 3.411745000  | -0.081529000 |
| C | -0.858378000 | 4.499408000  | 0.778949000  |
| C | -0.996011000 | 3.637670000  | -1.460558000 |
| C | -0.750460000 | 5.791150000  | 0.270355000  |
| H | -0.834516000 | 4.357930000  | 1.853442000  |
| C | -0.893871000 | 4.924557000  | -1.966732000 |
| H | -1.078982000 | 2.800589000  | -2.147308000 |
| C | -0.770757000 | 6.006872000  | -1.100406000 |
| H | -0.649870000 | 6.628347000  | 0.952596000  |
| H | -0.904504000 | 5.083521000  | -3.039309000 |
| H | -0.684867000 | 7.012932000  | -1.495817000 |
| C | 2.928130000  | -2.511733000 | -0.054442000 |
| C | 4.038362000  | -3.244664000 | 0.373101000  |
| C | 1.953095000  | -3.141681000 | -0.823771000 |
| C | 4.159249000  | -4.588350000 | 0.048604000  |
| H | 4.817151000  | -2.761511000 | 0.954690000  |
| C | 2.076418000  | -4.487557000 | -1.154984000 |
| H | 1.092025000  | -2.577221000 | -1.161825000 |
| C | 3.176674000  | -5.212026000 | -0.716023000 |
| H | 5.023002000  | -5.149731000 | 0.387274000  |
| H | 1.311753000  | -4.968158000 | -1.755324000 |
| H | 3.273528000  | -6.261969000 | -0.969427000 |
| C | 4.246770000  | -0.026015000 | -0.424145000 |
| C | 5.126276000  | 0.811200000  | 0.259401000  |
| C | 4.443064000  | -0.247441000 | -1.789459000 |
| C | 6.193422000  | 1.406390000  | -0.405588000 |
| H | 4.985054000  | 1.016683000  | 1.314642000  |
| C | 5.508520000  | 0.345993000  | -2.451780000 |
| H | 3.762313000  | -0.889479000 | -2.339964000 |
| C | 6.387652000  | 1.174066000  | -1.760564000 |
| H | 6.869729000  | 2.056097000  | 0.138968000  |
| H | 5.651822000  | 0.164041000  | -3.511118000 |
| H | 7.218596000  | 1.639679000  | -2.278765000 |
| H | 0.262962000  | 1.633439000  | 3.940506000  |
| H | 0.769931000  | 2.686994000  | 2.607640000  |
| H | 2.926225000  | 1.469021000  | 2.472979000  |
| H | 2.373968000  | 0.501662000  | 3.851023000  |
| H | 0.534329000  | -0.247227000 | 2.590084000  |
| H | -0.052281000 | -1.019977000 | 0.759847000  |
| C | -0.284085000 | -1.811823000 | 2.957616000  |
| C | -0.463819000 | -2.038339000 | 1.576024000  |
| H | 0.224427000  | -2.765114000 | 1.147458000  |
| H | 0.550117000  | -2.285360000 | 3.463198000  |
| H | -1.101026000 | -1.489515000 | 3.593049000  |
| C | -1.835624000 | -2.196760000 | 0.988399000  |
| C | -2.982330000 | -1.726586000 | 1.628629000  |
| C | -1.977353000 | -2.840694000 | -0.244257000 |
| C | -4.235983000 | -1.895656000 | 1.066457000  |
| H | -2.904127000 | -1.222498000 | 2.583564000  |
| C | -3.220180000 | -3.022815000 | -0.823311000 |
| H | -1.094251000 | -3.207235000 | -0.755895000 |
| C | -4.338266000 | -2.547147000 | -0.152669000 |
| H | -5.124238000 | -1.517947000 | 1.553881000  |
| H | -3.329098000 | -3.518417000 | -1.778595000 |
| N | -5.656737000 | -2.689536000 | -0.771111000 |
| O | -5.712897000 | -3.122695000 | -1.909188000 |
| O | -6.633967000 | -2.359259000 | -0.123083000 |

-----  
**TS1\_Ph-NO<sub>2</sub>**  
 -----

|   | Coordinates (Angstroms) |   |  |
|---|-------------------------|---|--|
| X | Y                       | Z |  |

|    |              |              |              |
|----|--------------|--------------|--------------|
| Mn | -0.962948000 | 0.454575000  | 0.091402000  |
| P  | -2.741893000 | -0.858272000 | -0.349829000 |
| O  | -1.895148000 | 1.503638000  | 2.665856000  |
| C  | -1.529761000 | 1.084867000  | 1.651519000  |
| N  | -0.139166000 | -0.494960000 | -1.635349000 |
| C  | -1.135994000 | -1.063172000 | -2.560904000 |
| C  | 0.876711000  | 0.310098000  | -2.339052000 |
| C  | 1.928658000  | 0.783055000  | -1.344138000 |
| C  | -2.155581000 | -1.878870000 | -1.774230000 |
| H  | 2.611324000  | 1.506029000  | -1.794166000 |
| H  | -1.670874000 | -2.756931000 | -1.337523000 |
| H  | 2.528668000  | -0.066513000 | -1.009968000 |
| P  | 1.068649000  | 1.439300000  | 0.158898000  |
| C  | -1.671928000 | 1.834824000  | -0.790634000 |
| O  | -2.149420000 | 2.732469000  | -1.335738000 |
| H  | -2.965282000 | -2.237079000 | -2.413219000 |
| C  | 2.269419000  | 1.147645000  | 1.510442000  |
| C  | 3.615487000  | 1.487750000  | 1.359474000  |
| C  | 1.843889000  | 0.557918000  | 2.698397000  |
| C  | 4.525584000  | 1.215374000  | 2.370908000  |
| H  | 3.959771000  | 1.959722000  | 0.444827000  |
| C  | 2.753839000  | 0.295657000  | 3.718389000  |
| H  | 0.800375000  | 0.289067000  | 2.817432000  |
| C  | 4.095602000  | 0.614682000  | 3.551337000  |
| H  | 5.571893000  | 1.467294000  | 2.237532000  |
| H  | 2.413409000  | -0.164916000 | 4.639257000  |
| H  | 4.808254000  | 0.399716000  | 4.340007000  |
| C  | 1.124688000  | 3.266032000  | 0.004424000  |
| C  | 1.227307000  | 3.903764000  | -1.230433000 |
| C  | 0.945873000  | 4.038906000  | 1.154217000  |
| C  | 1.168172000  | 5.290985000  | -1.314412000 |
| H  | 1.347293000  | 3.328149000  | -2.141829000 |
| C  | 0.886150000  | 5.423049000  | 1.069619000  |
| H  | 0.855304000  | 3.558231000  | 2.123231000  |
| C  | 0.999122000  | 6.052919000  | -0.165630000 |
| H  | 1.252043000  | 5.774662000  | -2.281352000 |
| H  | 0.749313000  | 6.010118000  | 1.971027000  |
| H  | 0.950020000  | 7.134117000  | -0.232570000 |
| C  | -3.407223000 | -2.094629000 | 0.829679000  |
| C  | -4.344216000 | -3.044621000 | 0.414144000  |
| C  | -2.990983000 | -2.085518000 | 2.159118000  |
| C  | -4.842814000 | -3.977871000 | 1.312003000  |
| H  | -4.695353000 | -3.049287000 | -0.613008000 |
| C  | -3.497145000 | -3.016091000 | 3.061821000  |
| H  | -2.261879000 | -1.352989000 | 2.486220000  |
| C  | -4.419692000 | -3.963766000 | 2.638516000  |
| H  | -5.567398000 | -4.713125000 | 0.979964000  |
| H  | -3.168235000 | -2.998067000 | 4.094918000  |
| H  | -4.812337000 | -4.690865000 | 3.340889000  |
| C  | -4.285792000 | -0.049988000 | -0.922514000 |
| C  | -4.611085000 | 0.095632000  | -2.269519000 |
| C  | -5.112939000 | 0.533070000  | 0.040976000  |
| C  | -5.749390000 | 0.801610000  | -2.647486000 |
| H  | -3.980855000 | -0.332304000 | -3.041273000 |
| C  | -6.249739000 | 1.233313000  | -0.336147000 |
| H  | -4.869374000 | 0.435619000  | 1.094623000  |
| C  | -6.571108000 | 1.369493000  | -1.683365000 |
| H  | -5.988841000 | 0.909957000  | -3.699710000 |
| H  | -6.884824000 | 1.676838000  | 0.422683000  |
| H  | -7.457351000 | 1.920178000  | -1.978592000 |
| H  | 1.350143000  | -0.275374000 | -3.137157000 |
| H  | 0.365926000  | 1.158982000  | -2.803049000 |
| H  | -1.620526000 | -0.231191000 | -3.081049000 |
| H  | -0.646624000 | -1.691042000 | -3.316536000 |
| H  | 0.348777000  | -1.289165000 | -1.204445000 |
| H  | -0.290920000 | -0.925810000 | 0.857683000  |
| C  | 0.353613000  | -2.392605000 | 1.071014000  |
| C  | 1.012170000  | -2.921028000 | -0.019984000 |
| H  | 0.445708000  | -3.528125000 | -0.721642000 |
| H  | -0.616661000 | -2.798922000 | 1.329614000  |
| H  | 0.911157000  | -2.000302000 | 1.914780000  |
| C  | 2.399534000  | -2.702715000 | -0.347598000 |
| C  | 3.300283000  | -2.035855000 | 0.511655000  |
| C  | 2.904814000  | -3.146330000 | -1.591471000 |
| C  | 4.607516000  | -1.799574000 | 0.143106000  |
| H  | 2.968524000  | -1.682816000 | 1.479697000  |
| C  | 4.208834000  | -2.913136000 | -1.972107000 |

|   |             |              |              |
|---|-------------|--------------|--------------|
| H | 2.242392000 | -3.675337000 | -2.269259000 |
| C | 5.056293000 | -2.227490000 | -1.103613000 |
| H | 5.281144000 | -1.277882000 | 0.809537000  |
| H | 4.579907000 | -3.248644000 | -2.931819000 |
| N | 6.424405000 | -1.955999000 | -1.502574000 |
| O | 6.804189000 | -2.370157000 | -2.587954000 |
| O | 7.135711000 | -1.319620000 | -0.739227000 |

-----

**TS2\_Ph-OCH<sub>3</sub>**

-----

|    | Coordinates (Angstroms) |              |              |
|----|-------------------------|--------------|--------------|
|    | X                       | Y            | Z            |
| Mn | 0.738383000             | 0.456422000  | 0.139146000  |
| P  | 2.612662000             | -0.791703000 | 0.391237000  |
| O  | 0.341079000             | -0.195821000 | -2.694347000 |
| C  | 0.481243000             | 0.054440000  | -1.572683000 |
| N  | 0.877511000             | 0.621506000  | 2.218583000  |
| C  | 2.233225000             | 0.489866000  | 2.782239000  |
| C  | 0.144509000             | 1.739061000  | 2.838203000  |
| C  | -1.268601000            | 1.777727000  | 2.268928000  |
| C  | 2.895480000             | -0.760962000 | 2.215041000  |
| H  | -1.842196000            | 2.623784000  | 2.651823000  |
| H  | 2.397187000             | -1.648496000 | 2.613165000  |
| H  | -1.797032000            | 0.861293000  | 2.549825000  |
| P  | -1.127644000            | 1.729206000  | 0.436507000  |
| C  | 1.707239000             | 1.889727000  | -0.273080000 |
| O  | 2.337240000             | 2.815092000  | -0.549998000 |
| H  | 3.951045000             | -0.823648000 | 2.487003000  |
| C  | -2.812383000            | 1.342103000  | -0.165469000 |
| C  | -3.934998000            | 1.931819000  | 0.420607000  |
| C  | -2.978658000            | 0.513633000  | -1.272033000 |
| C  | -5.201956000            | 1.690329000  | -0.092066000 |
| H  | -3.823375000            | 2.591977000  | 1.274834000  |
| C  | -4.246290000            | 0.287264000  | -1.796023000 |
| H  | -2.120221000            | 0.029427000  | -1.719917000 |
| C  | -5.358497000            | 0.871618000  | -1.206460000 |
| H  | -6.068576000            | 2.147076000  | 0.373666000  |
| H  | -4.364479000            | -0.366860000 | -2.652125000 |
| H  | -6.347619000            | 0.681750000  | -1.607890000 |
| C  | -0.992420000            | 3.483169000  | -0.099524000 |
| C  | -0.852790000            | 4.553832000  | 0.780318000  |
| C  | -0.970125000            | 3.730822000  | -1.474761000 |
| C  | -0.702610000            | 5.850345000  | 0.294877000  |
| H  | -0.853722000            | 4.394242000  | 1.852554000  |
| C  | -0.825395000            | 5.022445000  | -1.958160000 |
| H  | -1.063135000            | 2.906608000  | -2.175771000 |
| C  | -0.690904000            | 6.087709000  | -1.072430000 |
| H  | -0.593611000            | 6.673964000  | 0.992272000  |
| H  | -0.810904000            | 5.198160000  | -3.028140000 |
| H  | -0.571931000            | 7.097301000  | -1.450058000 |
| C  | 2.711575000             | -2.568931000 | -0.046414000 |
| C  | 3.732574000             | -3.380200000 | 0.454970000  |
| C  | 1.765682000             | -3.121490000 | -0.906640000 |
| C  | 3.795547000             | -4.723032000 | 0.109787000  |
| H  | 4.485735000             | -2.962005000 | 1.115325000  |
| C  | 1.833302000             | -4.465342000 | -1.260526000 |
| H  | 0.966841000             | -2.499397000 | -1.292901000 |
| C  | 2.845736000             | -5.267254000 | -0.750671000 |
| H  | 4.588632000             | -5.346413000 | 0.507865000  |
| H  | 1.092203000             | -4.883350000 | -1.932957000 |
| H  | 2.897916000             | -6.316279000 | -1.020696000 |
| C  | 4.155630000             | -0.145544000 | -0.361447000 |
| C  | 5.029372000             | 0.681927000  | 0.341605000  |
| C  | 4.402285000             | -0.400415000 | -1.712500000 |
| C  | 6.139604000             | 1.233527000  | -0.289073000 |
| H  | 4.849660000             | 0.912936000  | 1.385699000  |
| C  | 5.510302000             | 0.150712000  | -2.341238000 |
| H  | 3.727457000             | -1.034840000 | -2.278751000 |
| C  | 6.383120000             | 0.968345000  | -1.630149000 |
| H  | 6.810668000             | 1.875637000  | 0.270813000  |
| H  | 5.690804000             | -0.055648000 | -3.390417000 |
| H  | 7.247150000             | 1.400932000  | -2.122254000 |
| H  | 0.105784000             | 1.606738000  | 3.927605000  |
| H  | 0.678695000             | 2.671986000  | 2.630507000  |

|   |              |              |              |
|---|--------------|--------------|--------------|
| H | 2.805662000  | 1.388930000  | 2.532612000  |
| H | 2.181696000  | 0.417133000  | 3.876817000  |
| H | 0.355190000  | -0.256114000 | 2.550018000  |
| H | -0.215254000 | -0.968313000 | 0.686434000  |
| C | -0.505006000 | -1.781899000 | 2.864894000  |
| C | -0.658562000 | -2.002038000 | 1.477074000  |
| H | 0.043882000  | -2.722416000 | 1.061032000  |
| H | 0.309218000  | -2.274137000 | 3.386431000  |
| H | -1.345701000 | -1.483893000 | 3.481943000  |
| C | -2.019168000 | -2.178930000 | 0.862915000  |
| C | -3.185313000 | -1.704491000 | 1.460752000  |
| C | -2.137664000 | -2.867959000 | -0.344627000 |
| C | -4.430625000 | -1.930888000 | 0.889455000  |
| H | -3.131764000 | -1.159014000 | 2.396056000  |
| C | -3.376378000 | -3.103999000 | -0.925244000 |
| H | -1.241111000 | -3.232303000 | -0.836481000 |
| C | -4.527825000 | -2.638352000 | -0.301235000 |
| H | -5.333899000 | -1.552265000 | 1.354286000  |
| H | -3.454912000 | -3.637849000 | -1.866500000 |
| O | -5.761269000 | -2.828260000 | -0.876492000 |
| C | -6.279425000 | -4.138640000 | -0.711852000 |
| H | -6.434265000 | -4.367096000 | 0.349677000  |
| H | -7.238299000 | -4.168528000 | -1.230772000 |
| H | -5.612235000 | -4.893054000 | -1.144995000 |

### TS1\_Ph\_OCH<sub>3</sub>

|    | Coordinates (Angstroms) |              |              |
|----|-------------------------|--------------|--------------|
|    | X                       | Y            | Z            |
| Mn | -0.834020000            | 0.421387000  | 0.099223000  |
| P  | -2.655111000            | -0.841107000 | -0.327511000 |
| O  | -1.666056000            | 1.399074000  | 2.736745000  |
| C  | -1.338189000            | 1.005027000  | 1.699387000  |
| N  | -0.078227000            | -0.494283000 | -1.659767000 |
| C  | -1.102828000            | -1.032468000 | -2.574239000 |
| C  | 0.934940000             | 0.301356000  | -2.380661000 |
| C  | 2.022576000             | 0.748595000  | -1.412160000 |
| C  | -2.120682000            | -1.844804000 | -1.781267000 |
| H  | 2.693668000             | 1.476939000  | -1.870551000 |
| H  | -1.641488000            | -2.737350000 | -1.369324000 |
| H  | 2.628051000             | -0.110060000 | -1.114728000 |
| P  | 1.215267000             | 1.379814000  | 0.127110000  |
| C  | -1.544998000            | 1.839084000  | -0.710760000 |
| O  | -2.020868000            | 2.761080000  | -1.215569000 |
| H  | -2.950224000            | -2.178358000 | -2.408044000 |
| C  | 2.443008000             | 1.055483000  | 1.445812000  |
| C  | 3.785742000             | 1.399656000  | 1.276972000  |
| C  | 2.039910000             | 0.439169000  | 2.627901000  |
| C  | 4.712931000             | 1.110865000  | 2.267819000  |
| H  | 4.112743000             | 1.887318000  | 0.364322000  |
| C  | 2.967540000             | 0.158339000  | 3.626417000  |
| H  | 0.999511000             | 0.164777000  | 2.760016000  |
| C  | 4.304901000             | 0.486331000  | 3.443601000  |
| H  | 5.756155000             | 1.369026000  | 2.122174000  |
| H  | 2.644330000             | -0.323437000 | 4.542620000  |
| H  | 5.030914000             | 0.258822000  | 4.216513000  |
| C  | 1.275617000             | 3.209569000  | 0.006744000  |
| C  | 1.361783000             | 3.869261000  | -1.217792000 |
| C  | 1.116263000             | 3.962832000  | 1.172363000  |
| C  | 1.305385000             | 5.257948000  | -1.276562000 |
| H  | 1.465692000             | 3.309395000  | -2.140768000 |
| C  | 1.059947000             | 5.348469000  | 1.113112000  |
| H  | 1.037798000             | 3.465448000  | 2.133978000  |
| C  | 1.156236000             | 6.000045000  | -0.112311000 |
| H  | 1.375462000             | 5.757963000  | -2.236319000 |
| H  | 0.938130000             | 5.919704000  | 2.026820000  |
| H  | 1.109260000             | 7.082456000  | -0.159189000 |
| C  | -3.331688000            | -2.080708000 | 0.842285000  |
| C  | -4.328636000            | -2.973428000 | 0.439310000  |
| C  | -2.856534000            | -2.136162000 | 2.150570000  |
| C  | -4.827931000            | -3.915022000 | 1.328006000  |
| H  | -4.726233000            | -2.925343000 | -0.569616000 |
| C  | -3.362181000            | -3.075563000 | 3.044169000  |
| H  | -2.082923000            | -1.446473000 | 2.468522000  |

|   |              |              |              |
|---|--------------|--------------|--------------|
| C | -4.344020000 | -3.967196000 | 2.632657000  |
| H | -5.598432000 | -4.606736000 | 1.005757000  |
| H | -2.984599000 | -3.110071000 | 4.060053000  |
| H | -4.735929000 | -4.701812000 | 3.327628000  |
| C | -4.185288000 | 0.024522000  | -0.850928000 |
| C | -4.561868000 | 0.166838000  | -2.184551000 |
| C | -4.947605000 | 0.650269000  | 0.139166000  |
| C | -5.688106000 | 0.911465000  | -2.523341000 |
| H | -3.982450000 | -0.294455000 | -2.976501000 |
| C | -6.071944000 | 1.389185000  | -0.198584000 |
| H | -4.661738000 | 0.556914000  | 1.182549000  |
| C | -6.445280000 | 1.521894000  | -1.532833000 |
| H | -5.968424000 | 1.016453000  | -3.565800000 |
| H | -6.655137000 | 1.867304000  | 0.580634000  |
| H | -7.321645000 | 2.103077000  | -1.797767000 |
| H | 1.379207000  | -0.288374000 | -3.191970000 |
| H | 0.428028000  | 1.162086000  | -2.827409000 |
| H | -1.584411000 | -0.187470000 | -3.076143000 |
| H | -0.635957000 | -1.658950000 | -3.345201000 |
| H | 0.409988000  | -1.315442000 | -1.261469000 |
| H | -0.133845000 | -1.051456000 | 0.784755000  |
| C | 0.430267000  | -2.371187000 | 0.928693000  |
| C | 1.062623000  | -2.900945000 | -0.198071000 |
| H | 0.474650000  | -3.501765000 | -0.887607000 |
| H | -0.503431000 | -2.836303000 | 1.229639000  |
| H | 1.037845000  | -2.072000000 | 1.779940000  |
| C | 2.448889000  | -2.678086000 | -0.565790000 |
| C | 3.399593000  | -2.112091000 | 0.305514000  |
| C | 2.897317000  | -2.992791000 | -1.864884000 |
| C | 4.699889000  | -1.852371000 | -0.103164000 |
| H | 3.118681000  | -1.850202000 | 1.318965000  |
| C | 4.195953000  | -2.736293000 | -2.276858000 |
| H | 2.195120000  | -3.429925000 | -2.569897000 |
| C | 5.103926000  | -2.153070000 | -1.398523000 |
| H | 5.404309000  | -1.394844000 | 0.583771000  |
| H | 4.513245000  | -2.970667000 | -3.288007000 |
| O | 6.377877000  | -1.849136000 | -1.825147000 |
| C | 7.342869000  | -2.833798000 | -1.495160000 |
| H | 7.100006000  | -3.797259000 | -1.960220000 |
| H | 8.301476000  | -2.481088000 | -1.879067000 |
| H | 7.418762000  | -2.972598000 | -0.409846000 |

### A3\_H

|    | Coordinates (Angstroms) |              |              |
|----|-------------------------|--------------|--------------|
|    | X                       | Y            | Z            |
| Mn | -0.001761000            | 0.155148000  | 0.230824000  |
| P  | -2.260281000            | 0.136561000  | 0.534178000  |
| O  | 0.047723000             | 0.619333000  | -2.673596000 |
| C  | 0.022235000             | 0.468310000  | -1.527858000 |
| N  | -0.002110000            | -0.097973000 | 2.308703000  |
| C  | -1.184023000            | -0.709101000 | 2.870902000  |
| C  | 1.184287000             | -0.697086000 | 2.875003000  |
| C  | 2.425883000             | 0.029885000  | 2.363794000  |
| C  | -2.431043000            | 0.008141000  | 2.359528000  |
| H  | 3.363634000             | -0.435207000 | 2.677373000  |
| H  | -2.432086000            | 1.037401000  | 2.730622000  |
| H  | 2.418438000             | 1.060662000  | 2.730763000  |
| P  | 2.255872000             | 0.151545000  | 0.538022000  |
| C  | 0.005268000             | -1.613344000 | -0.045516000 |
| O  | 0.006038000             | -2.750469000 | -0.200214000 |
| H  | -3.362973000            | -0.468329000 | 2.673039000  |
| C  | 3.316877000             | 1.569942000  | 0.063420000  |
| C  | 2.770703000             | 2.663311000  | -0.604782000 |
| C  | 4.679648000             | 1.574220000  | 0.375797000  |
| C  | 3.568996000             | 3.749977000  | -0.950794000 |
| H  | 1.718090000             | 2.666116000  | -0.863311000 |
| C  | 5.475164000             | 2.658370000  | 0.033960000  |
| H  | 5.122915000             | 0.720517000  | 0.878795000  |
| C  | 4.919765000             | 3.749253000  | -0.629951000 |
| H  | 3.132854000             | 4.594526000  | -1.472734000 |
| H  | 6.531503000             | 2.651618000  | 0.279354000  |
| H  | 5.543246000             | 4.594561000  | -0.900163000 |
| C  | 3.177970000             | -1.258560000 | -0.181454000 |

|   |              |              |              |
|---|--------------|--------------|--------------|
| C | 3.553139000  | -2.372300000 | 0.566870000  |
| C | 3.430787000  | -1.246566000 | -1.555940000 |
| C | 4.182198000  | -3.451668000 | -0.046545000 |
| H | 3.350129000  | -2.415060000 | 1.630793000  |
| C | 4.061184000  | -2.321467000 | -2.165445000 |
| H | 3.136655000  | -0.389524000 | -2.154060000 |
| C | 4.438850000  | -3.428262000 | -1.410722000 |
| H | 4.467103000  | -4.314025000 | 0.546255000  |
| H | 4.253647000  | -2.297426000 | -3.232387000 |
| H | 4.926710000  | -4.271316000 | -1.887416000 |
| C | -3.316587000 | 1.559868000  | 0.062045000  |
| C | -4.605010000 | 1.695286000  | 0.586966000  |
| C | -2.846937000 | 2.515365000  | -0.836494000 |
| C | -5.401231000 | 2.773109000  | 0.226367000  |
| H | -4.989676000 | 0.952891000  | 1.278918000  |
| C | -3.648901000 | 3.591237000  | -1.206570000 |
| H | -1.852495000 | 2.418344000  | -1.257120000 |
| C | -4.923936000 | 3.722857000  | -0.672984000 |
| H | -6.397028000 | 2.872145000  | 0.644311000  |
| H | -3.274540000 | 4.325150000  | -1.911685000 |
| H | -5.548667000 | 4.562453000  | -0.957621000 |
| C | -3.184769000 | -1.269648000 | -0.191569000 |
| C | -3.551439000 | -2.389838000 | 0.551495000  |
| C | -3.446204000 | -1.249055000 | -1.564132000 |
| C | -4.180823000 | -3.466931000 | -0.065367000 |
| H | -3.340952000 | -2.439665000 | 1.613700000  |
| C | -4.076859000 | -2.321969000 | -2.177090000 |
| H | -3.157958000 | -0.387669000 | -2.158899000 |
| C | -4.446151000 | -3.435093000 | -1.427785000 |
| H | -4.458895000 | -4.334466000 | 0.523118000  |
| H | -4.275883000 | -2.291201000 | -3.242667000 |
| H | -4.934137000 | -4.276538000 | -1.907180000 |
| H | 1.169207000  | -0.631142000 | 3.976456000  |
| H | 1.274199000  | -1.780307000 | 2.641280000  |
| H | -1.263842000 | -1.792690000 | 2.634921000  |
| H | -1.172268000 | -0.645556000 | 3.972551000  |
| H | 0.038744000  | 1.711507000  | 1.087110000  |
| H | -0.105098000 | 1.947394000  | 0.350924000  |

### A3\_Ph-OCH<sub>3</sub>

|    | Coordinates (Angstroms) |              |              |
|----|-------------------------|--------------|--------------|
|    | X                       | Y            | Z            |
| Mn | -0.842593000            | 0.373098000  | 0.108827000  |
| P  | -2.635073000            | -0.981033000 | -0.307728000 |
| O  | -1.701253000            | 1.269356000  | 2.774114000  |
| C  | -1.353469000            | 0.902439000  | 1.736973000  |
| N  | -0.098311000            | -0.459934000 | -1.656417000 |
| C  | -1.105423000            | -1.039624000 | -2.567842000 |
| C  | 0.860344000             | 0.384606000  | -2.398430000 |
| C  | 1.950871000             | 0.875692000  | -1.454445000 |
| C  | -2.062205000            | -1.926622000 | -1.778623000 |
| H  | 2.599379000             | 1.613446000  | -1.929901000 |
| H  | -1.519735000            | -2.790404000 | -1.384147000 |
| H  | 2.580821000             | 0.036186000  | -1.149450000 |
| P  | 1.146237000             | 1.499765000  | 0.080576000  |
| C  | -1.667452000            | 1.759015000  | -0.634044000 |
| O  | -2.201049000            | 2.654541000  | -1.120458000 |
| H  | -2.877404000            | -2.304278000 | -2.399171000 |
| C  | 2.405701000             | 1.313051000  | 1.391165000  |
| C  | 3.699419000             | 1.806318000  | 1.208501000  |
| C  | 2.086182000             | 0.649451000  | 2.573227000  |
| C  | 4.662301000             | 1.622525000  | 2.189990000  |
| H  | 3.958451000             | 2.329501000  | 0.293628000  |
| C  | 3.050346000             | 0.471394000  | 3.560439000  |
| H  | 1.087496000             | 0.253352000  | 2.717071000  |
| C  | 4.338555000             | 0.952774000  | 3.367050000  |
| H  | 5.667277000             | 1.999847000  | 2.036827000  |
| H  | 2.794957000             | -0.050387000 | 4.475980000  |
| H  | 5.093055000             | 0.807503000  | 4.132402000  |
| C  | 1.032182000             | 3.319824000  | -0.094744000 |
| C  | 1.148931000             | 3.963931000  | -1.324493000 |
| C  | 0.720147000             | 4.072208000  | 1.040618000  |
| C  | 0.968671000             | 5.340582000  | -1.417093000 |

|   |              |              |              |
|---|--------------|--------------|--------------|
| H | 1.375631000  | 3.402751000  | -2.224026000 |
| C | 0.542159000  | 5.444943000  | 0.947137000  |
| H | 0.619065000  | 3.583816000  | 2.004829000  |
| C | 0.666498000  | 6.082808000  | -0.283401000 |
| H | 1.063951000  | 5.830517000  | -2.379783000 |
| H | 0.303085000  | 6.017451000  | 1.836513000  |
| H | 0.523858000  | 7.155136000  | -0.357872000 |
| C | -3.251225000 | -2.253666000 | 0.854637000  |
| C | -4.255737000 | -3.143421000 | 0.464205000  |
| C | -2.722102000 | -2.343012000 | 2.140223000  |
| C | -4.712139000 | -4.114052000 | 1.344279000  |
| H | -4.692480000 | -3.069804000 | -0.526731000 |
| C | -3.183353000 | -3.313572000 | 3.024202000  |
| H | -1.943110000 | -1.656578000 | 2.451864000  |
| C | -4.174988000 | -4.200289000 | 2.626002000  |
| H | -5.489860000 | -4.802522000 | 1.032975000  |
| H | -2.763614000 | -3.376282000 | 4.021866000  |
| H | -4.533521000 | -4.957658000 | 3.314375000  |
| C | -4.185056000 | -0.138084000 | -0.797654000 |
| C | -4.612382000 | -0.033418000 | -2.119177000 |
| C | -4.919765000 | 0.496278000  | 0.207981000  |
| C | -5.763522000 | 0.684876000  | -2.430415000 |
| H | -4.055248000 | -0.504676000 | -2.920966000 |
| C | -6.068674000 | 1.208077000  | -0.102988000 |
| H | -4.592888000 | 0.431221000  | 1.241386000  |
| C | -6.493349000 | 1.304205000  | -1.425020000 |
| H | -6.086168000 | 0.760872000  | -3.462994000 |
| H | -6.630786000 | 1.693400000  | 0.687054000  |
| H | -7.389520000 | 1.863783000  | -1.669141000 |
| H | 1.312775000  | -0.187830000 | -3.217175000 |
| H | 0.311731000  | 1.224179000  | -2.837665000 |
| H | -1.643534000 | -0.221207000 | -3.057117000 |
| H | -0.608939000 | -1.629468000 | -3.348634000 |
| H | 0.465970000  | -1.300006000 | -1.304418000 |
| H | 0.109465000  | -1.179953000 | 0.784823000  |
| C | 0.546607000  | -2.280084000 | 0.811082000  |
| C | 1.202359000  | -2.723744000 | -0.417425000 |
| H | 0.691784000  | -3.483099000 | -1.004527000 |
| H | -0.327731000 | -2.878132000 | 1.068769000  |
| H | 1.188816000  | -2.210654000 | 1.695879000  |
| C | 2.607045000  | -2.570332000 | -0.659944000 |
| C | 3.472136000  | -1.835068000 | 0.186301000  |
| C | 3.212917000  | -3.119044000 | -1.821720000 |
| C | 4.816887000  | -1.647943000 | -0.112765000 |
| H | 3.084928000  | -1.382680000 | 1.091319000  |
| C | 4.550658000  | -2.930977000 | -2.117554000 |
| H | 2.596868000  | -3.697580000 | -2.505514000 |
| C | 5.367066000  | -2.184683000 | -1.266983000 |
| H | 5.444249000  | -1.063560000 | 0.553706000  |
| H | 4.977382000  | -3.356620000 | -3.021255000 |
| O | 6.695217000  | -1.962833000 | -1.581663000 |
| C | 7.562457000  | -2.981640000 | -1.120140000 |
| H | 7.326275000  | -3.948651000 | -1.582309000 |
| H | 8.578160000  | -2.692734000 | -1.397951000 |
| H | 7.503706000  | -3.089924000 | -0.029622000 |

-----

**A3\_CH=CH<sub>2</sub>**

|    | Coordinates (Angstroms) |              |              |
|----|-------------------------|--------------|--------------|
|    | X                       | Y            | Z            |
| Mn | 0.104411000             | 0.178975000  | -0.015106000 |
| P  | 2.327599000             | -0.219862000 | 0.288762000  |
| O  | 0.137188000             | 0.431731000  | -2.943045000 |
| C  | 0.127091000             | 0.311851000  | -1.795394000 |
| N  | -0.011800000            | -0.240085000 | 2.038209000  |
| C  | 1.255574000             | -0.160875000 | 2.790923000  |
| C  | -1.098795000            | 0.465373000  | 2.746258000  |
| C  | -2.422689000            | 0.209062000  | 2.037453000  |
| C  | 2.358862000             | -0.865842000 | 2.011698000  |
| H  | -3.207078000            | 0.875063000  | 2.401746000  |
| H  | 2.134109000             | -1.933764000 | 1.935757000  |
| H  | -2.736116000            | -0.819911000 | 2.231716000  |
| P  | -2.161733000            | 0.359554000  | 0.213302000  |
| C  | 0.325497000             | 1.933136000  | 0.152985000  |

|   |              |              |              |
|---|--------------|--------------|--------------|
| O | 0.487736000  | 3.067425000  | 0.265441000  |
| H | 3.331917000  | -0.768476000 | 2.496855000  |
| C | -3.304957000 | -0.871484000 | -0.508942000 |
| C | -4.574315000 | -1.073836000 | 0.037480000  |
| C | -2.911714000 | -1.619743000 | -1.615995000 |
| C | -5.429054000 | -2.020827000 | -0.507808000 |
| H | -4.896764000 | -0.496670000 | 0.897788000  |
| C | -3.772468000 | -2.562885000 | -2.168761000 |
| H | -1.925309000 | -1.474807000 | -2.041752000 |
| C | -5.028268000 | -2.767403000 | -1.612170000 |
| H | -6.407897000 | -2.179215000 | -0.069263000 |
| H | -3.455768000 | -3.143034000 | -3.028322000 |
| H | -5.695985000 | -3.510012000 | -2.034859000 |
| C | -2.930217000 | 1.949136000  | -0.275279000 |
| C | -2.912287000 | 3.045597000  | 0.587157000  |
| C | -3.458281000 | 2.102286000  | -1.558142000 |
| C | -3.429787000 | 4.269488000  | 0.180122000  |
| H | -2.487770000 | 2.955870000  | 1.581591000  |
| C | -3.973144000 | 3.326833000  | -1.964019000 |
| H | -3.477339000 | 1.261765000  | -2.244024000 |
| C | -3.963076000 | 4.412323000  | -1.095091000 |
| H | -3.412949000 | 5.112533000  | 0.862022000  |
| H | -4.386549000 | 3.431795000  | -2.961019000 |
| H | -4.368141000 | 5.366875000  | -1.412225000 |
| C | 3.273183000  | -1.449750000 | -0.683211000 |
| C | 4.613463000  | -1.713094000 | -0.387195000 |
| C | 2.657584000  | -2.135929000 | -1.727668000 |
| C | 5.320341000  | -2.656595000 | -1.118909000 |
| H | 5.111257000  | -1.170779000 | 0.410623000  |
| C | 3.368260000  | -3.078419000 | -2.464299000 |
| H | 1.618380000  | -1.938489000 | -1.963551000 |
| C | 4.697515000  | -3.339990000 | -2.159978000 |
| H | 6.360281000  | -2.854323000 | -0.883827000 |
| H | 2.880807000  | -3.604924000 | -3.277168000 |
| H | 5.252250000  | -4.073426000 | -2.734813000 |
| C | 3.446227000  | 1.230544000  | 0.262417000  |
| C | 4.033253000  | 1.767592000  | 1.405553000  |
| C | 3.657793000  | 1.855332000  | -0.969805000 |
| C | 4.826335000  | 2.908451000  | 1.318973000  |
| H | 3.879312000  | 1.307548000  | 2.375006000  |
| C | 4.453961000  | 2.987525000  | -1.056027000 |
| H | 3.195885000  | 1.453880000  | -1.866928000 |
| C | 5.038950000  | 3.518054000  | 0.090244000  |
| H | 5.276093000  | 3.319619000  | 2.216026000  |
| H | 4.612061000  | 3.462337000  | -2.017862000 |
| H | 5.654988000  | 4.407988000  | 0.024240000  |
| H | -1.165719000 | 0.113941000  | 3.782897000  |
| H | -0.858367000 | 1.532867000  | 2.766828000  |
| H | 1.498663000  | 0.895682000  | 2.943426000  |
| H | 1.135386000  | -0.624037000 | 3.777975000  |
| H | -0.281068000 | -1.262399000 | 2.037447000  |
| H | -0.057566000 | -1.697672000 | -0.046500000 |
| C | -0.562164000 | -3.093098000 | 1.658437000  |
| C | -0.185826000 | -2.850221000 | 0.274759000  |
| H | 0.790490000  | -3.247541000 | -0.009540000 |
| H | 0.218830000  | -3.348691000 | 2.372251000  |
| H | -0.931691000 | -3.168405000 | -0.457601000 |
| C | -1.918736000 | -3.269891000 | 2.041428000  |
| H | -2.638304000 | -3.163455000 | 1.223368000  |
| C | -2.450284000 | -3.526865000 | 3.267470000  |
| H | -3.518219000 | -3.666214000 | 3.394985000  |
| H | -1.824136000 | -3.648965000 | 4.148773000  |

### A3\_Ph

|    | Coordinates (Angstroms) |              |              |
|----|-------------------------|--------------|--------------|
|    | X                       | Y            | Z            |
| Mn | -0.442180000            | 0.379156000  | 0.094601000  |
| P  | -2.500631000            | -0.541888000 | -0.269876000 |
| O  | -0.916787000            | 1.289483000  | 2.849908000  |
| C  | -0.728612000            | 0.910317000  | 1.776826000  |
| N  | 0.009901000             | -0.476110000 | -1.759512000 |
| C  | -1.145931000            | -0.773301000 | -2.628506000 |
| C  | 1.085278000             | 0.197975000  | -2.515880000 |



|   |              |              |              |
|---|--------------|--------------|--------------|
| C | 2.306616000  | 0.381832000  | -1.623844000 |
| C | -2.221390000 | -1.492058000 | -1.821522000 |
| H | 3.062261000  | 1.011435000  | -2.097082000 |
| H | -1.848214000 | -2.469946000 | -1.505062000 |
| H | 2.766693000  | -0.589089000 | -1.421837000 |
| P | 1.742463000  | 1.039413000  | 0.003189000  |
| C | -0.982396000 | 1.953872000  | -0.522065000 |
| O | -1.333878000 | 2.971358000  | -0.927833000 |
| H | -3.129886000 | -1.659580000 | -2.403456000 |
| C | 2.986196000  | 0.457883000  | 1.208451000  |
| C | 4.349694000  | 0.642523000  | 0.968245000  |
| C | 2.579206000  | -0.203154000 | 2.364812000  |
| C | 5.289282000  | 0.157577000  | 1.865942000  |
| H | 4.680017000  | 1.160453000  | 0.073664000  |
| C | 3.521836000  | -0.683488000 | 3.268472000  |
| H | 1.523628000  | -0.360803000 | 2.553566000  |
| C | 4.876123000  | -0.508187000 | 3.017054000  |
| H | 6.346315000  | 0.296987000  | 1.668308000  |
| H | 3.195459000  | -1.201374000 | 4.163354000  |
| H | 5.611975000  | -0.889252000 | 3.716551000  |
| C | 2.047780000  | 2.844689000  | -0.036597000 |
| C | 2.145780000  | 3.552549000  | -1.233341000 |
| C | 2.088262000  | 3.543419000  | 1.172268000  |
| C | 2.298678000  | 4.935208000  | -1.222134000 |
| H | 2.099743000  | 3.036255000  | -2.186060000 |
| C | 2.241784000  | 4.922790000  | 1.181663000  |
| H | 2.008068000  | 3.008525000  | 2.113389000  |
| C | 2.349122000  | 5.622016000  | -0.016331000 |
| H | 2.377122000  | 5.473481000  | -2.160222000 |
| H | 2.278001000  | 5.452516000  | 2.127110000  |
| H | 2.470472000  | 6.699546000  | -0.008220000 |
| C | -3.286374000 | -1.731487000 | 0.877837000  |
| C | -4.457329000 | -2.405452000 | 0.520589000  |
| C | -2.716963000 | -1.969126000 | 2.126774000  |
| C | -5.037994000 | -3.311935000 | 1.396272000  |
| H | -4.923052000 | -2.214740000 | -0.441128000 |
| C | -3.303028000 | -2.872755000 | 3.007274000  |
| H | -1.806710000 | -1.454388000 | 2.411360000  |
| C | -4.460835000 | -3.546069000 | 2.641683000  |
| H | -5.945099000 | -3.833008000 | 1.110759000  |
| H | -2.850724000 | -3.049573000 | 3.976582000  |
| H | -4.916730000 | -4.253004000 | 3.326083000  |
| C | -3.869977000 | 0.625433000  | -0.607243000 |
| C | -4.360770000 | 0.877406000  | -1.886168000 |
| C | -4.384863000 | 1.345844000  | 0.474112000  |
| C | -5.359253000 | 1.827764000  | -2.080750000 |
| H | -3.970080000 | 0.343329000  | -2.744865000 |
| C | -5.382444000 | 2.289303000  | 0.279372000  |
| H | -4.003132000 | 1.168296000  | 1.475025000  |
| C | -5.872764000 | 2.532177000  | -1.000535000 |
| H | -5.734255000 | 2.015135000  | -3.080894000 |
| H | -5.775795000 | 2.838969000  | 1.127154000  |
| H | -6.649410000 | 3.273288000  | -1.153408000 |
| H | 1.358699000  | -0.397868000 | -3.395111000 |
| H | 0.702754000  | 1.161465000  | -2.868139000 |
| H | -1.526747000 | 0.168443000  | -3.037445000 |
| H | -0.829895000 | -1.401673000 | -3.470624000 |
| H | 0.399181000  | -1.432207000 | -1.487439000 |
| H | 0.184993000  | -1.378596000 | 0.624089000  |
| C | 0.411452000  | -2.538602000 | 0.581314000  |
| C | 0.846463000  | -3.046576000 | -0.718831000 |
| H | 0.123433000  | -3.619284000 | -1.294413000 |
| H | -0.528693000 | -2.973612000 | 0.921786000  |
| H | 1.145597000  | -2.625721000 | 1.388478000  |
| C | 2.214915000  | -3.193590000 | -1.102582000 |
| C | 3.309626000  | -2.738471000 | -0.322721000 |
| C | 2.559503000  | -3.789733000 | -2.347644000 |
| C | 4.622264000  | -2.855245000 | -0.761186000 |
| H | 3.129194000  | -2.278062000 | 0.641789000  |
| C | 3.868833000  | -3.899084000 | -2.775354000 |
| H | 1.759584000  | -4.166248000 | -2.980860000 |
| C | 4.927357000  | -3.427456000 | -1.992162000 |
| H | 5.419764000  | -2.486485000 | -0.121941000 |
| H | 4.074116000  | -4.362394000 | -3.736554000 |
| H | 5.953631000  | -3.515800000 | -2.330412000 |

## A3\_C≡CH

|    | Coordinates (Angstroms) |              |              |
|----|-------------------------|--------------|--------------|
|    | X                       | Y            | Z            |
| Mn | 0.088445000             | 0.111184000  | 0.021519000  |
| P  | 2.333204000             | -0.199049000 | 0.334972000  |
| O  | 0.097944000             | 0.187258000  | -2.918501000 |
| C  | 0.096708000             | 0.134661000  | -1.766616000 |
| N  | -0.000699000            | -0.181734000 | 2.088206000  |
| C  | 1.260316000             | 0.011839000  | 2.828850000  |
| C  | -1.125551000            | 0.494116000  | 2.764369000  |
| C  | -2.430935000            | 0.126365000  | 2.069140000  |
| C  | 2.392671000             | -0.704995000 | 2.102211000  |
| H  | -3.269149000            | 0.720195000  | 2.438387000  |
| H  | 2.207392000             | -1.783028000 | 2.109747000  |
| H  | -2.660833000            | -0.927957000 | 2.253350000  |
| P  | -2.185171000            | 0.282930000  | 0.250876000  |
| C  | 0.266458000             | 1.877190000  | 0.069301000  |
| O  | 0.391272000             | 3.019658000  | 0.111580000  |
| H  | 3.361643000             | -0.536077000 | 2.575752000  |
| C  | -3.341125000            | -0.927308000 | -0.480668000 |
| C  | -4.680504000            | -0.956558000 | -0.085174000 |
| C  | -2.886570000            | -1.842271000 | -1.425909000 |
| C  | -5.546619000            | -1.897803000 | -0.620626000 |
| H  | -5.047399000            | -0.242980000 | 0.645682000  |
| C  | -3.757419000            | -2.782172000 | -1.968226000 |
| H  | -1.847206000            | -1.828756000 | -1.732855000 |
| C  | -5.084678000            | -2.812812000 | -1.563315000 |
| H  | -6.583380000            | -1.920250000 | -0.303574000 |
| H  | -3.394118000            | -3.494889000 | -2.700067000 |
| H  | -5.762589000            | -3.550560000 | -1.978439000 |
| C  | -2.916438000            | 1.887901000  | -0.241681000 |
| C  | -3.112464000            | 2.922807000  | 0.670689000  |
| C  | -3.192371000            | 2.110488000  | -1.592950000 |
| C  | -3.591017000            | 4.156778000  | 0.241968000  |
| H  | -2.890821000            | 2.780238000  | 1.722538000  |
| C  | -3.669454000            | 3.342003000  | -2.019143000 |
| H  | -3.041877000            | 1.315947000  | -2.317202000 |
| C  | -3.870789000            | 4.368440000  | -1.101416000 |
| H  | -3.741149000            | 4.953225000  | 0.962491000  |
| H  | -3.882454000            | 3.501373000  | -3.070342000 |
| H  | -4.243557000            | 5.330477000  | -1.435296000 |
| C  | 3.308314000             | -1.468736000 | -0.551741000 |
| C  | 4.647623000             | -1.699327000 | -0.225629000 |
| C  | 2.713834000             | -2.218749000 | -1.564023000 |
| C  | 5.373265000             | -2.673873000 | -0.896019000 |
| H  | 5.128703000             | -1.108298000 | 0.547556000  |
| C  | 3.443065000             | -3.192119000 | -2.239221000 |
| H  | 1.675374000             | -2.048638000 | -1.822868000 |
| C  | 4.770989000             | -3.421202000 | -1.904767000 |
| H  | 6.411993000             | -2.847450000 | -0.637680000 |
| H  | 2.970666000             | -3.769195000 | -3.026190000 |
| H  | 5.340183000             | -4.180291000 | -2.430037000 |
| C  | 3.392934000             | 1.285816000  | 0.180563000  |
| C  | 3.957427000             | 1.941791000  | 1.271937000  |
| C  | 3.576447000             | 1.813508000  | -1.100625000 |
| C  | 4.701152000             | 3.103672000  | 1.085430000  |
| H  | 3.821667000             | 1.560729000  | 2.277500000  |
| C  | 4.322510000             | 2.967643000  | -1.285695000 |
| H  | 3.129560000             | 1.320566000  | -1.958897000 |
| C  | 4.886396000             | 3.616747000  | -0.190887000 |
| H  | 5.134298000             | 3.606438000  | 1.943122000  |
| H  | 4.458112000             | 3.367424000  | -2.284363000 |
| H  | 5.462123000             | 4.524299000  | -0.334490000 |
| H  | -1.172048000            | 0.188708000  | 3.816965000  |
| H  | -0.948870000            | 1.574306000  | 2.734616000  |
| H  | 1.461603000             | 1.085587000  | 2.905222000  |
| H  | 1.160435000             | -0.385152000 | 3.846858000  |
| H  | -0.212710000            | -1.235512000 | 2.164071000  |
| H  | -0.071610000            | -1.809002000 | 0.090790000  |
| C  | -0.434796000            | -3.019444000 | 1.933864000  |
| C  | -0.063850000            | -2.897026000 | 0.508107000  |
| H  | 0.953646000             | -3.233330000 | 0.300494000  |
| H  | 0.325138000             | -3.406009000 | 2.607901000  |
| H  | -0.747694000            | -3.391897000 | -0.187122000 |

|   |              |              |             |
|---|--------------|--------------|-------------|
| C | -1.767462000 | -3.308916000 | 2.262004000 |
| C | -2.948742000 | -3.473217000 | 2.516990000 |
| H | -3.961489000 | -3.742645000 | 2.702057000 |

A3\_Ph-NO<sub>2</sub>

|    | Coordinates (Angstroms) |              |              |
|----|-------------------------|--------------|--------------|
|    | X                       | Y            | Z            |
| Mn | -0.901691000            | 0.389877000  | 0.134035000  |
| P  | -2.729191000            | -0.926807000 | -0.342125000 |
| O  | -1.883617000            | 1.488004000  | 2.682909000  |
| C  | -1.489926000            | 1.039392000  | 1.699446000  |
| N  | -0.095023000            | -0.529843000 | -1.590916000 |
| C  | -1.091135000            | -1.091281000 | -2.527953000 |
| C  | 0.914439000             | 0.281354000  | -2.306666000 |
| C  | 1.976788000             | 0.767230000  | -1.330368000 |
| C  | -2.118422000            | -1.920832000 | -1.766039000 |
| H  | 2.664135000             | 1.471464000  | -1.802175000 |
| H  | -1.638281000            | -2.803275000 | -1.334602000 |
| H  | 2.571161000             | -0.079154000 | -0.975640000 |
| P  | 1.139411000             | 1.462781000  | 0.156500000  |
| C  | -1.641344000            | 1.774148000  | -0.706121000 |
| O  | -2.118361000            | 2.666366000  | -1.247118000 |
| H  | -2.917295000            | -2.271767000 | -2.422208000 |
| C  | 2.335890000             | 1.258229000  | 1.518019000  |
| C  | 3.674126000             | 1.616823000  | 1.342718000  |
| C  | 1.925876000             | 0.706811000  | 2.729962000  |
| C  | 4.592221000             | 1.405470000  | 2.360577000  |
| H  | 4.007396000             | 2.048532000  | 0.404684000  |
| C  | 2.845457000             | 0.505130000  | 3.754170000  |
| H  | 0.890831000             | 0.418053000  | 2.873410000  |
| C  | 4.178499000             | 0.846452000  | 3.566712000  |
| H  | 5.633628000             | 1.665723000  | 2.209210000  |
| H  | 2.520272000             | 0.069889000  | 4.692409000  |
| H  | 4.899643000             | 0.675370000  | 4.358144000  |
| C  | 1.071269000             | 3.276018000  | -0.071497000 |
| C  | 1.224221000             | 3.878577000  | -1.318228000 |
| C  | 0.758411000             | 4.067164000  | 1.036588000  |
| C  | 1.077347000             | 5.255248000  | -1.454449000 |
| H  | 1.456461000             | 3.285356000  | -2.195538000 |
| C  | 0.613160000             | 5.439930000  | 0.898548000  |
| H  | 0.634334000             | 3.610809000  | 2.013778000  |
| C  | 0.772097000             | 6.036877000  | -0.348271000 |
| H  | 1.201655000             | 5.714799000  | -2.428590000 |
| H  | 0.373925000             | 6.044841000  | 1.766033000  |
| H  | 0.655312000             | 7.109295000  | -0.456790000 |
| C  | -3.442431000            | -2.146254000 | 0.817130000  |
| C  | -4.343013000            | -3.112700000 | 0.361403000  |
| C  | -3.109745000            | -2.105187000 | 2.169457000  |
| C  | -4.890428000            | -4.030100000 | 1.246600000  |
| H  | -4.622816000            | -3.146229000 | -0.686737000 |
| C  | -3.664791000            | -3.020805000 | 3.057638000  |
| H  | -2.408711000            | -1.362715000 | 2.532980000  |
| C  | -4.552534000            | -3.983754000 | 2.596410000  |
| H  | -5.586424000            | -4.779016000 | 0.885757000  |
| H  | -3.401243000            | -2.979752000 | 4.108411000  |
| H  | -4.982633000            | -4.699942000 | 3.287682000  |
| C  | -4.212464000            | -0.031545000 | -0.930295000 |
| C  | -4.540020000            | 0.089428000  | -2.278852000 |
| C  | -4.992526000            | 0.627151000  | 0.023691000  |
| C  | -5.637309000            | 0.851923000  | -2.668055000 |
| H  | -3.946646000            | -0.401808000 | -3.041683000 |
| C  | -6.088395000            | 1.382730000  | -0.366083000 |
| H  | -4.746766000            | 0.545442000  | 1.078040000  |
| C  | -6.412258000            | 1.497915000  | -1.714667000 |
| H  | -5.881251000            | 0.942034000  | -3.720748000 |
| H  | -6.688408000            | 1.886489000  | 0.383374000  |
| H  | -7.265796000            | 2.092915000  | -2.019694000 |
| H  | 1.383170000             | -0.312022000 | -3.099595000 |
| H  | 0.396010000             | 1.122230000  | -2.777269000 |
| H  | -1.573082000            | -0.256326000 | -3.045900000 |
| H  | -0.592207000            | -1.710665000 | -3.282208000 |
| H  | 0.411075000             | -1.344464000 | -1.189757000 |
| H  | 0.014816000             | -1.198262000 | 1.033095000  |

|   |              |              |              |
|---|--------------|--------------|--------------|
| C | 0.301468000  | -2.291756000 | 1.167525000  |
| C | 0.974995000  | -2.899152000 | -0.007581000 |
| H | 0.387878000  | -3.565991000 | -0.633142000 |
| H | -0.627761000 | -2.803909000 | 1.417033000  |
| H | 0.919839000  | -2.259252000 | 2.070414000  |
| C | 2.316688000  | -2.748893000 | -0.307297000 |
| C | 3.226980000  | -1.975600000 | 0.501148000  |
| C | 2.893038000  | -3.331435000 | -1.497980000 |
| C | 4.523200000  | -1.757368000 | 0.127679000  |
| H | 2.877070000  | -1.538319000 | 1.428018000  |
| C | 4.183215000  | -3.100151000 | -1.871029000 |
| H | 2.262860000  | -3.960437000 | -2.120395000 |
| C | 5.023481000  | -2.287642000 | -1.075607000 |
| H | 5.177257000  | -1.161381000 | 0.751423000  |
| H | 4.583155000  | -3.534567000 | -2.778855000 |
| N | 6.345706000  | -2.016364000 | -1.477466000 |
| O | 6.763676000  | -2.501683000 | -2.535826000 |
| O | 7.055165000  | -1.291982000 | -0.767524000 |

### A3\_CHO

|    | Coordinates (Angstroms) |              |              |
|----|-------------------------|--------------|--------------|
|    | X                       | Y            | Z            |
| Mn | -0.041606000            | 0.085006000  | 0.013833000  |
| P  | 2.245223000             | 0.139556000  | 0.282247000  |
| O  | -0.093014000            | 0.274519000  | -2.922748000 |
| C  | -0.069737000            | 0.175821000  | -1.775916000 |
| N  | -0.009396000            | -0.157491000 | 2.134333000  |
| C  | 1.180711000             | 0.429171000  | 2.776328000  |
| C  | -1.245408000            | 0.273280000  | 2.810173000  |
| C  | -2.435414000            | -0.403274000 | 2.140095000  |
| C  | 2.433506000             | -0.107039000 | 2.094458000  |
| H  | -3.386973000            | -0.093535000 | 2.576337000  |
| H  | 2.492830000             | -1.189119000 | 2.244324000  |
| H  | -2.344513000            | -1.486825000 | 2.264855000  |
| P  | -2.318211000            | -0.075509000 | 0.334602000  |
| C  | -0.124300000            | 1.862976000  | 0.078917000  |
| O  | -0.170528000            | 3.009745000  | 0.107504000  |
| H  | 3.342652000             | 0.342511000  | 2.498128000  |
| C  | -3.372326000            | -1.341107000 | -0.456322000 |
| C  | -4.667611000            | -1.576064000 | 0.012068000  |
| C  | -2.900234000            | -2.061379000 | -1.550948000 |
| C  | -5.471935000            | -2.524630000 | -0.602339000 |
| H  | -5.053287000            | -1.012152000 | 0.855342000  |
| C  | -3.709786000            | -3.007836000 | -2.170997000 |
| H  | -1.896002000            | -1.888382000 | -1.920352000 |
| C  | -4.993523000            | -3.241011000 | -1.696101000 |
| H  | -6.474525000            | -2.703659000 | -0.230268000 |
| H  | -3.333538000            | -3.563009000 | -3.022835000 |
| H  | -5.624251000            | -3.980730000 | -2.176683000 |
| C  | -3.266071000            | 1.460091000  | 0.019718000  |
| C  | -3.671913000            | 2.324433000  | 1.034112000  |
| C  | -3.519073000            | 1.804862000  | -1.310629000 |
| C  | -4.328855000            | 3.511510000  | 0.723884000  |
| H  | -3.479268000            | 2.088986000  | 2.074618000  |
| C  | -4.177456000            | 2.986384000  | -1.617797000 |
| H  | -3.205365000            | 1.142985000  | -2.112097000 |
| C  | -4.583459000            | 3.843815000  | -0.599701000 |
| H  | -4.639398000            | 4.177318000  | 1.521511000  |
| H  | -4.371106000            | 3.239397000  | -2.654174000 |
| H  | -5.094031000            | 4.769947000  | -0.839173000 |
| C  | 3.365255000             | -1.081824000 | -0.487050000 |
| C  | 4.649458000             | -1.276746000 | 0.025979000  |
| C  | 2.952872000             | -1.819441000 | -1.593975000 |
| C  | 5.501211000             | -2.205834000 | -0.553202000 |
| H  | 4.988175000             | -0.703594000 | 0.882843000  |
| C  | 3.810509000             | -2.744552000 | -2.180022000 |
| H  | 1.956173000             | -1.683197000 | -1.997578000 |
| C  | 5.082059000             | -2.941449000 | -1.657892000 |
| H  | 6.493005000             | -2.357409000 | -0.142034000 |
| H  | 3.479359000             | -3.316003000 | -3.039914000 |
| H  | 5.748249000             | -3.668640000 | -2.108899000 |
| C  | 3.057024000             | 1.730946000  | -0.121383000 |
| C  | 3.358115000             | 2.687609000  | 0.845878000  |

|   |              |              |              |
|---|--------------|--------------|--------------|
| C | 3.302834000  | 2.020590000  | -1.465823000 |
| C | 3.908887000  | 3.910798000  | 0.475819000  |
| H | 3.165216000  | 2.494669000  | 1.895101000  |
| C | 3.853954000  | 3.239750000  | -1.832731000 |
| H | 3.069873000  | 1.286764000  | -2.231078000 |
| C | 4.158654000  | 4.188397000  | -0.861345000 |
| H | 4.140751000  | 4.647126000  | 1.237296000  |
| H | 4.044443000  | 3.450009000  | -2.879241000 |
| H | 4.588653000  | 5.141667000  | -1.147870000 |
| H | -1.209589000 | -0.002437000 | 3.870542000  |
| H | -1.324795000 | 1.363998000  | 2.747345000  |
| H | 1.122220000  | 1.520254000  | 2.695876000  |
| H | 1.200756000  | 0.168099000  | 3.840638000  |
| H | 0.055690000  | -1.191117000 | 2.350478000  |
| H | 0.392964000  | -1.792060000 | -0.194951000 |
| C | 1.032688000  | -3.525919000 | 0.970357000  |
| C | 1.018568000  | -3.423431000 | 2.331375000  |
| O | 0.257899000  | -2.669596000 | 3.044761000  |
| C | 0.032023000  | -2.812609000 | 0.125327000  |
| H | -0.921922000 | -2.702105000 | 0.644213000  |
| H | -0.156030000 | -3.315718000 | -0.826759000 |
| H | 1.743601000  | -4.058109000 | 2.873999000  |
| H | 1.768507000  | -4.164427000 | 0.493554000  |

### TS3\_H

|    | Coordinates (Angstroms) |              |              |
|----|-------------------------|--------------|--------------|
|    | X                       | Y            | Z            |
| Mn | 0.000000000             | 0.136414000  | 0.224108000  |
| P  | -2.251934000            | 0.134333000  | 0.511236000  |
| O  | 0.000001000             | 0.938435000  | -2.603362000 |
| C  | 0.000000000             | 0.629937000  | -1.490519000 |
| N  | 0.000000000             | -0.076834000 | 2.336248000  |
| C  | -1.201374000            | -0.645522000 | 2.902260000  |
| C  | 1.201374000             | -0.645522000 | 2.902260000  |
| C  | 2.430810000             | 0.066617000  | 2.343956000  |
| C  | -2.430809000            | 0.066618000  | 2.343956000  |
| H  | 3.370303000             | -0.388684000 | 2.665515000  |
| H  | -2.433932000            | 1.109193000  | 2.676503000  |
| H  | 2.433933000             | 1.109192000  | 2.676504000  |
| P  | 2.251934000             | 0.134333000  | 0.511237000  |
| C  | 0.000000000             | -1.609899000 | -0.192867000 |
| O  | 0.000001000             | -2.732368000 | -0.439612000 |
| H  | -3.370303000            | -0.388682000 | 2.665515000  |
| C  | 3.309487000             | 1.548725000  | 0.019802000  |
| C  | 2.727801000             | 2.709892000  | -0.485123000 |
| C  | 4.697512000             | 1.493398000  | 0.176162000  |
| C  | 3.519439000             | 3.802823000  | -0.826158000 |
| H  | 1.652566000             | 2.759996000  | -0.614240000 |
| C  | 5.486041000             | 2.584528000  | -0.160928000 |
| H  | 5.165460000             | 0.590106000  | 0.554459000  |
| C  | 4.897273000             | 3.741594000  | -0.663794000 |
| H  | 3.056944000             | 4.699303000  | -1.224090000 |
| H  | 6.561896000             | 2.530954000  | -0.035248000 |
| H  | 5.514685000             | 4.591935000  | -0.932341000 |
| C  | 3.176852000             | -1.292131000 | -0.168954000 |
| C  | 3.570013000             | -2.378606000 | 0.609201000  |
| C  | 3.406782000             | -1.324538000 | -1.547322000 |
| C  | 4.195622000             | -3.474582000 | 0.021880000  |
| H  | 3.384759000             | -2.387494000 | 1.677305000  |
| C  | 4.034191000             | -2.415265000 | -2.130893000 |
| H  | 3.094739000             | -0.490448000 | -2.168604000 |
| C  | 4.430878000             | -3.494399000 | -1.346141000 |
| H  | 4.495151000             | -4.315173000 | 0.638279000  |
| H  | 4.208991000             | -2.426650000 | -3.201075000 |
| H  | 4.915881000             | -4.350001000 | -1.802922000 |
| C  | -3.309487000            | 1.548725000  | 0.019802000  |
| C  | -4.697512000            | 1.493399000  | 0.176161000  |
| C  | -2.727800000            | 2.709892000  | -0.485124000 |
| C  | -5.486040000            | 2.584528000  | -0.160929000 |
| H  | -5.165460000            | 0.590107000  | 0.554458000  |
| C  | -3.519439000            | 3.802824000  | -0.826159000 |
| H  | -1.652566000            | 2.759996000  | -0.614240000 |
| C  | -4.897273000            | 3.741595000  | -0.663795000 |

|   |              |              |              |
|---|--------------|--------------|--------------|
| H | -6.561895000 | 2.530955000  | -0.035250000 |
| H | -3.056943000 | 4.699303000  | -1.224090000 |
| H | -5.514684000 | 4.591936000  | -0.932342000 |
| C | -3.176853000 | -1.292131000 | -0.168954000 |
| C | -3.570015000 | -2.378605000 | 0.609201000  |
| C | -3.406781000 | -1.324539000 | -1.547321000 |
| C | -4.195624000 | -3.474581000 | 0.021881000  |
| H | -3.384762000 | -2.387492000 | 1.677306000  |
| C | -4.034191000 | -2.415265000 | -2.130893000 |
| H | -3.094737000 | -0.490449000 | -2.168604000 |
| C | -4.430880000 | -3.494399000 | -1.346140000 |
| H | -4.495154000 | -4.315171000 | 0.638280000  |
| H | -4.208991000 | -2.426651000 | -3.201075000 |
| H | -4.915883000 | -4.350001000 | -1.802921000 |
| H | 1.202327000  | -0.546902000 | 4.000157000  |
| H | 1.275570000  | -1.729967000 | 2.686818000  |
| H | -1.275571000 | -1.729967000 | 2.686818000  |
| H | -1.202327000 | -0.546902000 | 4.000156000  |
| H | 0.000000000  | 1.211341000  | 1.565603000  |
| H | 0.000000000  | 1.754617000  | 0.816584000  |

### TS3\_Ph-OCH<sub>3</sub>

|    | Coordinates (Angstroms) |              |              |
|----|-------------------------|--------------|--------------|
|    | X                       | Y            | Z            |
| Mn | -0.850864000            | 0.369554000  | 0.109268000  |
| P  | -2.628716000            | -1.008711000 | -0.299649000 |
| O  | -1.708325000            | 1.237425000  | 2.786402000  |
| C  | -1.357829000            | 0.878412000  | 1.747058000  |
| N  | -0.106682000            | -0.453100000 | -1.625563000 |
| C  | -1.083707000            | -1.065607000 | -2.542919000 |
| C  | 0.843412000             | 0.378519000  | -2.386248000 |
| C  | 1.930680000             | 0.910119000  | -1.459627000 |
| C  | -2.042569000            | -1.957296000 | -1.760926000 |
| H  | 2.554058000             | 1.662476000  | -1.946035000 |
| H  | -1.498797000            | -2.816161000 | -1.358361000 |
| H  | 2.586344000             | 0.092274000  | -1.152416000 |
| P  | 1.123197000             | 1.523603000  | 0.075741000  |
| C  | -1.698173000            | 1.748243000  | -0.612815000 |
| O  | -2.240244000            | 2.636457000  | -1.102964000 |
| H  | -2.852656000            | -2.342396000 | -2.383839000 |
| C  | 2.389980000             | 1.346963000  | 1.382025000  |
| C  | 3.676280000             | 1.858735000  | 1.196897000  |
| C  | 2.086887000             | 0.668044000  | 2.559696000  |
| C  | 4.646848000             | 1.680114000  | 2.171769000  |
| H  | 3.923155000             | 2.392875000  | 0.284985000  |
| C  | 3.058785000             | 0.494194000  | 3.540118000  |
| H  | 1.094576000             | 0.257503000  | 2.706672000  |
| C  | 4.338907000             | 0.995747000  | 3.344679000  |
| H  | 5.645423000             | 2.073398000  | 2.016894000  |
| H  | 2.815145000             | -0.038506000 | 4.452595000  |
| H  | 5.099130000             | 0.855283000  | 4.105284000  |
| C  | 0.981911000             | 3.341631000  | -0.094036000 |
| C  | 1.064723000             | 3.984894000  | -1.327096000 |
| C  | 0.681033000             | 4.091084000  | 1.046195000  |
| C  | 0.863749000             | 5.358703000  | -1.417871000 |
| H  | 1.279138000             | 3.424355000  | -2.230082000 |
| C  | 0.482465000             | 5.461170000  | 0.954298000  |
| H  | 0.604284000             | 3.602582000  | 2.012570000  |
| C  | 0.574273000             | 6.098626000  | -0.279283000 |
| H  | 0.932481000             | 5.848333000  | -2.382961000 |
| H  | 0.252556000             | 6.031744000  | 1.847331000  |
| H  | 0.416106000             | 7.168891000  | -0.352370000 |
| C  | -3.235678000            | -2.279087000 | 0.870650000  |
| C  | -4.258093000            | -3.155410000 | 0.496390000  |
| C  | -2.677513000            | -2.385633000 | 2.142615000  |
| C  | -4.704645000            | -4.128593000 | 1.378713000  |
| H  | -4.716091000            | -3.068807000 | -0.483838000 |
| C  | -3.128328000            | -3.359218000 | 3.028779000  |
| H  | -1.884857000            | -1.709687000 | 2.442580000  |
| C  | -4.138865000            | -4.231659000 | 2.646792000  |
| H  | -5.496973000            | -4.805883000 | 1.079838000  |
| H  | -2.686742000            | -3.434664000 | 4.016092000  |
| H  | -4.490027000            | -4.990557000 | 3.337292000  |

|   |              |              |              |
|---|--------------|--------------|--------------|
| C | -4.183398000 | -0.179528000 | -0.796208000 |
| C | -4.599466000 | -0.072501000 | -2.121212000 |
| C | -4.933039000 | 0.443050000  | 0.205723000  |
| C | -5.754403000 | 0.636534000  | -2.439360000 |
| H | -4.029742000 | -0.534117000 | -2.919650000 |
| C | -6.085804000 | 1.145476000  | -0.112287000 |
| H | -4.614610000 | 0.375949000  | 1.241641000  |
| C | -6.499287000 | 1.243936000  | -1.437733000 |
| H | -6.067888000 | 0.714923000  | -3.474582000 |
| H | -6.659723000 | 1.621737000  | 0.674784000  |
| H | -7.398378000 | 1.796389000  | -1.687343000 |
| H | 1.307336000  | -0.215399000 | -3.184682000 |
| H | 0.299168000  | 1.203394000  | -2.861629000 |
| H | -1.630680000 | -0.276328000 | -3.072359000 |
| H | -0.559189000 | -1.667584000 | -3.297720000 |
| H | 0.528359000  | -1.374225000 | -1.258489000 |
| C | 0.589381000  | -2.291313000 | 0.760130000  |
| C | 1.207867000  | -2.592341000 | -0.555381000 |
| H | 0.766987000  | -3.443556000 | -1.074570000 |
| H | -0.277800000 | -2.919023000 | 0.969131000  |
| H | 1.259035000  | -2.346979000 | 1.626198000  |
| C | 2.646554000  | -2.488592000 | -0.735997000 |
| C | 3.495081000  | -1.799156000 | 0.153694000  |
| C | 3.267571000  | -3.025996000 | -1.887550000 |
| C | 4.854703000  | -1.638853000 | -0.096071000 |
| H | 3.087648000  | -1.356691000 | 1.054936000  |
| C | 4.619880000  | -2.870629000 | -2.137893000 |
| H | 2.656361000  | -3.568877000 | -2.603983000 |
| C | 5.425516000  | -2.166708000 | -1.243469000 |
| H | 5.475414000  | -1.085716000 | 0.602107000  |
| H | 5.064840000  | -3.287509000 | -3.036518000 |
| O | 6.767158000  | -1.975184000 | -1.509628000 |
| C | 7.591455000  | -3.027665000 | -1.043064000 |
| H | 7.341454000  | -3.978283000 | -1.530939000 |
| H | 8.622264000  | -2.762688000 | -1.285665000 |
| H | 7.497194000  | -3.153931000 | 0.042872000  |
| H | 0.185291000  | -1.215120000 | 0.844559000  |

TS3\_CH=CH<sub>2</sub>

|    | Coordinates (Angstroms) |              |              |
|----|-------------------------|--------------|--------------|
|    | X                       | Y            | Z            |
| Mn | 0.103253000             | 0.175712000  | -0.015729000 |
| P  | 2.330253000             | -0.226212000 | 0.283074000  |
| O  | 0.140167000             | 0.427254000  | -2.946410000 |
| C  | 0.126525000             | 0.301894000  | -1.799047000 |
| N  | -0.014219000            | -0.273716000 | 1.985204000  |
| C  | 1.232125000             | -0.235546000 | 2.767856000  |
| C  | -1.092010000            | 0.394810000  | 2.733635000  |
| C  | -2.427605000            | 0.191793000  | 2.027126000  |
| C  | 2.357608000             | -0.906402000 | 1.989747000  |
| H  | -3.192120000            | 0.875433000  | 2.401238000  |
| H  | 2.152375000             | -1.975631000 | 1.887285000  |
| H  | -2.775585000            | -0.828454000 | 2.201372000  |
| P  | -2.162687000            | 0.364462000  | 0.207737000  |
| C  | 0.328983000             | 1.924272000  | 0.146170000  |
| O  | 0.490457000             | 3.056077000  | 0.280220000  |
| H  | 3.326325000             | -0.802165000 | 2.482836000  |
| C  | -3.305169000            | -0.859917000 | -0.529492000 |
| C  | -4.591209000            | -1.031639000 | -0.011078000 |
| C  | -2.896420000            | -1.638396000 | -1.609602000 |
| C  | -5.446657000            | -1.977863000 | -0.556216000 |
| H  | -4.925844000            | -0.427970000 | 0.826248000  |
| C  | -3.757574000            | -2.581616000 | -2.162355000 |
| H  | -1.898744000            | -1.516650000 | -2.015556000 |
| C  | -5.029493000            | -2.755558000 | -1.633016000 |
| H  | -6.438793000            | -2.111510000 | -0.139717000 |
| H  | -3.428725000            | -3.185368000 | -3.000858000 |
| H  | -5.697780000            | -3.497496000 | -2.056030000 |
| C  | -2.924774000            | 1.959006000  | -0.272064000 |
| C  | -2.899723000            | 3.050160000  | 0.596944000  |
| C  | -3.453603000            | 2.122216000  | -1.553429000 |
| C  | -3.411562000            | 4.279020000  | 0.197687000  |
| H  | -2.472902000            | 2.952064000  | 1.589598000  |

|   |              |              |              |
|---|--------------|--------------|--------------|
| C | -3.962941000 | 3.351687000  | -1.951310000 |
| H | -3.476968000 | 1.285955000  | -2.244374000 |
| C | -3.946201000 | 4.431850000  | -1.075826000 |
| H | -3.388956000 | 5.118124000  | 0.884241000  |
| H | -4.376971000 | 3.464731000  | -2.947176000 |
| H | -4.346835000 | 5.390345000  | -1.386716000 |
| C | 3.283253000  | -1.433352000 | -0.710663000 |
| C | 4.633561000  | -1.670851000 | -0.439213000 |
| C | 2.660438000  | -2.137544000 | -1.738861000 |
| C | 5.343715000  | -2.605125000 | -1.179658000 |
| H | 5.135671000  | -1.115588000 | 0.346875000  |
| C | 3.374075000  | -3.071042000 | -2.484127000 |
| H | 1.613676000  | -1.960416000 | -1.956651000 |
| C | 4.713768000  | -3.305970000 | -2.204718000 |
| H | 6.391318000  | -2.782835000 | -0.963271000 |
| H | 2.880970000  | -3.610851000 | -3.284833000 |
| H | 5.271026000  | -4.031836000 | -2.786706000 |
| C | 3.433621000  | 1.234734000  | 0.282448000  |
| C | 3.976725000  | 1.782721000  | 1.442198000  |
| C | 3.672642000  | 1.860826000  | -0.944082000 |
| C | 4.755031000  | 2.935079000  | 1.376885000  |
| H | 3.799047000  | 1.322638000  | 2.407603000  |
| C | 4.453139000  | 3.005283000  | -1.008422000 |
| H | 3.243986000  | 1.450923000  | -1.853770000 |
| C | 4.995427000  | 3.546071000  | 0.153927000  |
| H | 5.171582000  | 3.354382000  | 2.286114000  |
| H | 4.632245000  | 3.481386000  | -1.965955000 |
| H | 5.599425000  | 4.445329000  | 0.104772000  |
| H | -1.158641000 | -0.021104000 | 3.747730000  |
| H | -0.858457000 | 1.462067000  | 2.830916000  |
| H | 1.487672000  | 0.806910000  | 2.995176000  |
| H | 1.086511000  | -0.753859000 | 3.725646000  |
| H | -0.317988000 | -1.433980000 | 1.984946000  |
| C | -0.549882000 | -2.919127000 | 1.744505000  |
| C | -0.183271000 | -2.862376000 | 0.305529000  |
| H | 0.782914000  | -3.317262000 | 0.075031000  |
| H | 0.204116000  | -3.365211000 | 2.395552000  |
| H | -0.932733000 | -3.281400000 | -0.371777000 |
| C | -1.915239000 | -3.247714000 | 2.087776000  |
| H | -2.642789000 | -3.093077000 | 1.285042000  |
| C | -2.411670000 | -3.668726000 | 3.269958000  |
| H | -3.473147000 | -3.850019000 | 3.401139000  |
| H | -1.767062000 | -3.853524000 | 4.126650000  |
| H | -0.061874000 | -1.787207000 | -0.103739000 |

### TS3\_Ph

|    | Coordinates (Angstroms) |              |              |
|----|-------------------------|--------------|--------------|
|    | X                       | Y            | Z            |
| Mn | -0.452432000            | 0.382719000  | 0.088970000  |
| P  | -2.500982000            | -0.564561000 | -0.266327000 |
| O  | -0.932963000            | 1.268340000  | 2.853184000  |
| C  | -0.739832000            | 0.894686000  | 1.778527000  |
| N  | 0.004916000             | -0.471499000 | -1.725422000 |
| C  | -1.126166000            | -0.810949000 | -2.605526000 |
| C  | 1.070197000             | 0.184729000  | -2.503790000 |
| C  | 2.295344000             | 0.420200000  | -1.627663000 |
| C  | -2.208269000            | -1.527944000 | -1.804875000 |
| H  | 3.023132000             | 1.075431000  | -2.110039000 |
| H  | -1.834271000            | -2.500759000 | -1.474556000 |
| H  | 2.791263000             | -0.531440000 | -1.422534000 |
| P  | 1.724055000             | 1.066397000  | -0.000127000 |
| C  | -1.013450000            | 1.952079000  | -0.509843000 |
| O  | -1.376390000            | 2.962012000  | -0.924431000 |
| H  | -3.113119000            | -1.704276000 | -2.390188000 |
| C  | 2.971239000             | 0.483965000  | 1.202738000  |
| C  | 4.333295000             | 0.684348000  | 0.966553000  |
| C  | 2.570138000             | -0.198641000 | 2.348600000  |
| C  | 5.276868000             | 0.195733000  | 1.858107000  |
| H  | 4.658974000             | 1.218383000  | 0.079730000  |
| C  | 3.516564000             | -0.683514000 | 3.246009000  |
| H  | 1.516054000             | -0.369095000 | 2.534656000  |
| C  | 4.869344000             | -0.490979000 | 2.998924000  |
| H  | 6.332664000             | 0.348400000  | 1.663556000  |



|   |              |              |              |
|---|--------------|--------------|--------------|
| H | 3.194404000  | -1.217287000 | 4.133080000  |
| H | 5.608246000  | -0.874308000 | 3.694006000  |
| C | 2.012745000  | 2.873959000  | -0.024150000 |
| C | 2.062357000  | 3.594072000  | -1.216826000 |
| C | 2.087345000  | 3.561085000  | 1.189518000  |
| C | 2.202542000  | 4.977817000  | -1.197018000 |
| H | 1.985308000  | 3.085467000  | -2.171794000 |
| C | 2.228084000  | 4.941871000  | 1.207275000  |
| H | 2.043757000  | 3.016328000  | 2.127355000  |
| C | 2.288228000  | 5.653400000  | 0.013331000  |
| H | 2.242213000  | 5.526250000  | -2.131678000 |
| H | 2.291623000  | 5.462828000  | 2.156149000  |
| H | 2.399754000  | 6.731937000  | 0.028040000  |
| C | -3.272489000 | -1.751265000 | 0.895048000  |
| C | -4.456876000 | -2.413334000 | 0.560196000  |
| C | -2.674009000 | -2.006558000 | 2.126864000  |
| C | -5.023040000 | -3.324056000 | 1.441027000  |
| H | -4.943366000 | -2.209761000 | -0.388591000 |
| C | -3.244949000 | -2.914960000 | 3.012415000  |
| H | -1.753400000 | -1.501167000 | 2.394471000  |
| C | -4.417076000 | -3.575340000 | 2.669319000  |
| H | -5.941101000 | -3.835230000 | 1.173084000  |
| H | -2.770821000 | -3.104596000 | 3.968836000  |
| H | -4.861608000 | -4.285284000 | 3.358116000  |
| C | -3.880614000 | 0.586364000  | -0.613929000 |
| C | -4.353559000 | 0.838633000  | -1.899569000 |
| C | -4.421083000 | 1.295392000  | 0.462460000  |
| C | -5.359882000 | 1.778068000  | -2.105775000 |
| H | -3.941363000 | 0.313503000  | -2.753673000 |
| C | -5.426860000 | 2.227705000  | 0.255910000  |
| H | -4.053053000 | 1.117483000  | 1.468506000  |
| C | -5.899426000 | 2.470850000  | -1.030651000 |
| H | -5.720259000 | 1.966374000  | -3.111113000 |
| H | -5.840647000 | 2.768286000  | 1.099814000  |
| H | -6.682168000 | 3.203581000  | -1.192629000 |
| H | 1.353878000  | -0.445306000 | -3.357283000 |
| H | 0.689542000  | 1.131499000  | -2.905714000 |
| H | -1.522406000 | 0.103357000  | -3.063481000 |
| H | -0.781662000 | -1.464595000 | -3.418922000 |
| H | 0.449604000  | -1.535601000 | -1.444890000 |
| C | 0.425323000  | -2.569921000 | 0.510109000  |
| C | 0.869328000  | -2.902062000 | -0.868646000 |
| H | 0.207866000  | -3.586494000 | -1.400183000 |
| H | -0.526755000 | -3.036073000 | 0.768240000  |
| H | 1.140965000  | -2.803365000 | 1.305791000  |
| C | 2.272716000  | -3.117696000 | -1.171221000 |
| C | 3.327146000  | -2.713094000 | -0.325434000 |
| C | 2.656624000  | -3.704290000 | -2.400895000 |
| C | 4.660302000  | -2.870005000 | -0.689210000 |
| H | 3.106078000  | -2.256973000 | 0.632562000  |
| C | 3.984154000  | -3.858987000 | -2.759000000 |
| H | 1.878729000  | -4.038203000 | -3.083182000 |
| C | 5.009207000  | -3.438643000 | -1.908240000 |
| H | 5.433490000  | -2.538264000 | -0.002413000 |
| H | 4.227440000  | -4.316730000 | -3.713522000 |
| H | 6.049458000  | -3.561742000 | -2.188416000 |
| H | 0.237600000  | -1.446691000 | 0.675287000  |

TS3\_C≡CH

|    | Coordinates (Angstroms) |              |              |
|----|-------------------------|--------------|--------------|
|    | X                       | Y            | Z            |
| Mn | 0.092691000             | 0.118274000  | 0.021724000  |
| P  | 2.335625000             | -0.215541000 | 0.327248000  |
| O  | 0.077218000             | 0.180212000  | -2.919837000 |
| C  | 0.088098000             | 0.128125000  | -1.767530000 |
| N  | 0.005571000             | -0.189389000 | 2.055901000  |
| C  | 1.257067000             | -0.047632000 | 2.817064000  |
| C  | -1.092446000            | 0.490859000  | 2.761929000  |
| C  | -2.422599000            | 0.197505000  | 2.075611000  |
| C  | 2.393219000             | -0.752227000 | 2.083775000  |
| H  | -3.217724000            | 0.855768000  | 2.431436000  |
| H  | 2.210350000             | -1.830250000 | 2.070704000  |
| H  | -2.720385000            | -0.834882000 | 2.277075000  |

|   |              |              |              |
|---|--------------|--------------|--------------|
| P | -2.176941000 | 0.308994000  | 0.252440000  |
| C | 0.291982000  | 1.878053000  | 0.053361000  |
| O | 0.431542000  | 3.018881000  | 0.100657000  |
| H | 3.362472000  | -0.590760000 | 2.559845000  |
| C | -3.329214000 | -0.927451000 | -0.443158000 |
| C | -4.660372000 | -0.970163000 | -0.021498000 |
| C | -2.880878000 | -1.850050000 | -1.383862000 |
| C | -5.523788000 | -1.930659000 | -0.526422000 |
| H | -5.022758000 | -0.251445000 | 0.706603000  |
| C | -3.748783000 | -2.809959000 | -1.895344000 |
| H | -1.848665000 | -1.827207000 | -1.713263000 |
| C | -5.067394000 | -2.853300000 | -1.464462000 |
| H | -6.553827000 | -1.962472000 | -0.188730000 |
| H | -3.389608000 | -3.527743000 | -2.624325000 |
| H | -5.742904000 | -3.605949000 | -1.856124000 |
| C | -2.920053000 | 1.896059000  | -0.277475000 |
| C | -2.948487000 | 2.998076000  | 0.576869000  |
| C | -3.377144000 | 2.040417000  | -1.588840000 |
| C | -3.441455000 | 4.219850000  | 0.133056000  |
| H | -2.578952000 | 2.914981000  | 1.593394000  |
| C | -3.868729000 | 3.261698000  | -2.030609000 |
| H | -3.358280000 | 1.194614000  | -2.268570000 |
| C | -3.904346000 | 4.353779000  | -1.169896000 |
| H | -3.459632000 | 5.068117000  | 0.808451000  |
| H | -4.226429000 | 3.360052000  | -3.049627000 |
| H | -4.290020000 | 5.306326000  | -1.516072000 |
| C | 3.307233000  | -1.473673000 | -0.581018000 |
| C | 4.652407000  | -1.696379000 | -0.273901000 |
| C | 2.703905000  | -2.226675000 | -1.585880000 |
| C | 5.375360000  | -2.664968000 | -0.955761000 |
| H | 5.140105000  | -1.103271000 | 0.493497000  |
| C | 3.430187000  | -3.194401000 | -2.272483000 |
| H | 1.661193000  | -2.062468000 | -1.831025000 |
| C | 4.764254000  | -3.414984000 | -1.957149000 |
| H | 6.418773000  | -2.831767000 | -0.712139000 |
| H | 2.950990000  | -3.773094000 | -3.054172000 |
| H | 5.331418000  | -4.168946000 | -2.491912000 |
| C | 3.398750000  | 1.268922000  | 0.195247000  |
| C | 3.951007000  | 1.914760000  | 1.298893000  |
| C | 3.594473000  | 1.809437000  | -1.078801000 |
| C | 4.695019000  | 3.079349000  | 1.131440000  |
| H | 3.804692000  | 1.523695000  | 2.299087000  |
| C | 4.340587000  | 2.966456000  | -1.244694000 |
| H | 3.156155000  | 1.324979000  | -1.946301000 |
| C | 4.892316000  | 3.605379000  | -0.137791000 |
| H | 5.118449000  | 3.574415000  | 1.998436000  |
| H | 4.485175000  | 3.376722000  | -2.237849000 |
| H | 5.467861000  | 4.515304000  | -0.266434000 |
| H | -1.142578000 | 0.143471000  | 3.802793000  |
| H | -0.893822000 | 1.569324000  | 2.785713000  |
| H | 1.485165000  | 1.016619000  | 2.953939000  |
| H | 1.137286000  | -0.489644000 | 3.816082000  |
| H | -0.250040000 | -1.354912000 | 2.143970000  |
| C | -0.460353000 | -2.865124000 | 1.979951000  |
| C | -0.067674000 | -2.890578000 | 0.532990000  |
| H | 0.964342000  | -3.213321000 | 0.383621000  |
| H | 0.256045000  | -3.351988000 | 2.642029000  |
| H | -0.716034000 | -3.492412000 | -0.110264000 |
| C | -1.808013000 | -3.209511000 | 2.264062000  |
| C | -2.983383000 | -3.428084000 | 2.474810000  |
| H | -4.008541000 | -3.652787000 | 2.650338000  |
| H | -0.121359000 | -1.862179000 | 0.038629000  |

-----  
**TS3\_Ph-NO<sub>2</sub>**  
 -----

|    | Coordinates (Angstroms) |              |              |
|----|-------------------------|--------------|--------------|
|    | X                       | Y            | Z            |
| Mn | -0.959061000            | 0.371930000  | 0.127151000  |
| P  | -2.765459000            | -0.967594000 | -0.325603000 |
| O  | -1.861630000            | 1.269438000  | 2.781910000  |
| C  | -1.493083000            | 0.897933000  | 1.754403000  |
| N  | -0.182255000            | -0.496372000 | -1.555303000 |
| C  | -1.123077000            | -1.122732000 | -2.496360000 |
| C  | 0.809069000             | 0.289165000  | -2.308046000 |

|   |              |              |              |
|---|--------------|--------------|--------------|
| C | 1.878652000  | 0.838396000  | -1.371510000 |
| C | -2.149242000 | -1.962833000 | -1.743211000 |
| H | 2.510828000  | 1.581712000  | -1.860444000 |
| H | -1.663083000 | -2.837875000 | -1.303758000 |
| H | 2.530200000  | 0.030356000  | -1.033815000 |
| P | 1.046914000  | 1.482752000  | 0.137925000  |
| C | -1.760432000 | 1.774344000  | -0.601145000 |
| O | -2.269673000 | 2.674624000  | -1.101829000 |
| H | -2.947789000 | -2.324505000 | -2.394681000 |
| C | 2.281852000  | 1.275384000  | 1.469980000  |
| C | 3.591466000  | 1.728481000  | 1.294018000  |
| C | 1.936143000  | 0.626168000  | 2.652851000  |
| C | 4.543623000  | 1.517451000  | 2.280421000  |
| H | 3.872219000  | 2.240753000  | 0.379311000  |
| C | 2.889657000  | 0.420940000  | 3.645605000  |
| H | 0.924675000  | 0.264135000  | 2.797919000  |
| C | 4.193528000  | 0.860344000  | 3.457233000  |
| H | 5.561373000  | 1.859592000  | 2.129894000  |
| H | 2.613111000  | -0.088754000 | 4.561834000  |
| H | 4.939916000  | 0.692519000  | 4.225766000  |
| C | 0.947513000  | 3.300845000  | -0.040632000 |
| C | 1.060046000  | 3.935679000  | -1.275577000 |
| C | 0.648738000  | 4.060562000  | 1.093180000  |
| C | 0.890377000  | 5.313086000  | -1.374203000 |
| H | 1.273823000  | 3.366410000  | -2.173347000 |
| C | 0.480752000  | 5.434110000  | 0.992799000  |
| H | 0.550118000  | 3.577863000  | 2.060534000  |
| C | 0.602134000  | 6.063674000  | -0.242217000 |
| H | 0.982562000  | 5.797232000  | -2.340019000 |
| H | 0.252150000  | 6.013617000  | 1.880335000  |
| H | 0.467696000  | 7.136654000  | -0.321682000 |
| C | -3.453178000 | -2.195972000 | 0.843737000  |
| C | -4.503590000 | -3.032972000 | 0.456519000  |
| C | -2.921466000 | -2.317149000 | 2.125772000  |
| C | -5.002867000 | -3.982299000 | 1.336642000  |
| H | -4.940998000 | -2.934516000 | -0.531964000 |
| C | -3.424409000 | -3.267265000 | 3.009074000  |
| H | -2.107986000 | -1.671750000 | 2.436853000  |
| C | -4.462295000 | -4.101044000 | 2.614346000  |
| H | -5.816833000 | -4.628963000 | 1.028254000  |
| H | -3.002734000 | -3.354206000 | 4.004094000  |
| H | -4.854195000 | -4.842025000 | 3.302357000  |
| C | -4.267511000 | -0.098801000 | -0.904606000 |
| C | -4.581387000 | 0.048107000  | -2.254022000 |
| C | -5.074943000 | 0.518287000  | 0.054562000  |
| C | -5.691826000 | 0.793562000  | -2.638912000 |
| H | -3.965034000 | -0.409303000 | -3.019493000 |
| C | -6.184272000 | 1.256514000  | -0.330834000 |
| H | -4.837937000 | 0.417300000  | 1.109332000  |
| C | -6.494590000 | 1.396698000  | -1.680332000 |
| H | -5.924263000 | 0.904285000  | -3.692315000 |
| H | -6.805535000 | 1.727398000  | 0.422774000  |
| H | -7.358739000 | 1.978144000  | -1.981879000 |
| H | 1.288048000  | -0.339495000 | -3.071253000 |
| H | 0.301977000  | 1.108693000  | -2.834267000 |
| H | -1.622556000 | -0.346580000 | -3.090415000 |
| H | -0.575215000 | -1.765791000 | -3.200225000 |
| H | 0.476044000  | -1.499731000 | -1.120445000 |
| C | 0.402866000  | -2.438350000 | 0.862575000  |
| C | 1.048542000  | -2.646897000 | -0.479905000 |
| H | 0.623892000  | -3.467530000 | -1.059583000 |
| H | -0.534901000 | -2.989611000 | 0.942736000  |
| H | 1.022813000  | -2.721514000 | 1.720785000  |
| C | 2.476625000  | -2.544169000 | -0.613012000 |
| C | 3.295674000  | -1.912150000 | 0.354857000  |
| C | 3.127542000  | -3.002900000 | -1.789708000 |
| C | 4.645608000  | -1.717018000 | 0.151951000  |
| H | 2.858370000  | -1.549342000 | 1.276387000  |
| C | 4.470958000  | -2.812620000 | -2.002291000 |
| H | 2.537805000  | -3.508844000 | -2.548073000 |
| C | 5.235694000  | -2.154707000 | -1.031408000 |
| H | 5.248309000  | -1.221270000 | 0.901768000  |
| H | 4.946217000  | -3.163858000 | -2.909108000 |
| N | 6.642057000  | -1.934033000 | -1.253657000 |
| O | 7.141735000  | -2.349752000 | -2.292322000 |
| O | 7.283639000  | -1.334678000 | -0.398561000 |
| H | 0.145806000  | -1.360159000 | 1.055769000  |

-----  
**TS3\_CHO**  
 -----

|    | Coordinates (Angstroms) |              |              |
|----|-------------------------|--------------|--------------|
|    | X                       | Y            | Z            |
| Mn | 0.020034000             | 0.172660000  | -0.021271000 |
| P  | 2.286937000             | 0.119349000  | 0.278952000  |
| O  | 0.130624000             | 0.495896000  | -2.945779000 |
| C  | 0.080724000             | 0.340960000  | -1.803950000 |
| N  | 0.006463000             | -0.355353000 | 1.947298000  |
| C  | 1.142196000             | 0.091764000  | 2.767070000  |
| C  | -1.242292000            | -0.185054000 | 2.703376000  |
| C  | -2.426997000            | -0.674552000 | 1.877590000  |
| C  | 2.461066000             | -0.245634000 | 2.077741000  |
| H  | -3.386349000            | -0.445094000 | 2.345760000  |
| H  | 2.653346000             | -1.317627000 | 2.154252000  |
| H  | -2.374153000            | -1.760163000 | 1.760248000  |
| P  | -2.253449000            | 0.010122000  | 0.183386000  |
| C  | -0.024775000            | 1.933173000  | 0.156719000  |
| O  | -0.063163000            | 3.072187000  | 0.309749000  |
| H  | 3.307379000             | 0.273991000  | 2.531199000  |
| C  | -3.281469000            | -1.083270000 | -0.865337000 |
| C  | -4.651981000            | -1.216384000 | -0.625740000 |
| C  | -2.698339000            | -1.805347000 | -1.904263000 |
| C  | -5.421101000            | -2.064826000 | -1.409347000 |
| H  | -5.122662000            | -0.647596000 | 0.169889000  |
| C  | -3.470812000            | -2.651295000 | -2.693743000 |
| H  | -1.636352000            | -1.710724000 | -2.097961000 |
| C  | -4.830598000            | -2.782652000 | -2.446118000 |
| H  | -6.483374000            | -2.164227000 | -1.215765000 |
| H  | -3.007329000            | -3.204528000 | -3.502893000 |
| H  | -5.434188000            | -3.440798000 | -3.061335000 |
| C  | -3.185062000            | 1.583862000  | 0.139777000  |
| C  | -3.653343000            | 2.220802000  | 1.286666000  |
| C  | -3.357562000            | 2.200002000  | -1.102676000 |
| C  | -4.296438000            | 3.451693000  | 1.191512000  |
| H  | -3.520360000            | 1.769534000  | 2.263355000  |
| C  | -4.003027000            | 3.423889000  | -1.195950000 |
| H  | -2.985274000            | 1.719374000  | -2.002515000 |
| C  | -4.474150000            | 4.052830000  | -0.047029000 |
| H  | -4.657591000            | 3.939178000  | 2.090330000  |
| H  | -4.134388000            | 3.891211000  | -2.165452000 |
| H  | -4.974330000            | 5.012119000  | -0.119676000 |
| C  | 3.342979000             | -1.126310000 | -0.544871000 |
| C  | 4.683563000             | -1.275956000 | -0.177457000 |
| C  | 2.812770000             | -1.947059000 | -1.537452000 |
| C  | 5.473586000             | -2.238414000 | -0.788324000 |
| H  | 5.112788000             | -0.632794000 | 0.584326000  |
| C  | 3.606585000             | -2.910691000 | -2.152504000 |
| H  | 1.775548000             | -1.836493000 | -1.832045000 |
| C  | 4.934755000             | -3.058384000 | -1.776771000 |
| H  | 6.511889000             | -2.350346000 | -0.496443000 |
| H  | 3.184290000             | -3.545301000 | -2.923612000 |
| H  | 5.553777000             | -3.810559000 | -2.253261000 |
| C  | 3.190513000             | 1.679662000  | -0.030139000 |
| C  | 3.299662000             | 2.659009000  | 0.956642000  |
| C  | 3.691192000             | 1.939981000  | -1.307521000 |
| C  | 3.915920000             | 3.873285000  | 0.676264000  |
| H  | 2.897133000             | 2.488116000  | 1.949393000  |
| C  | 4.306457000             | 3.153266000  | -1.585176000 |
| H  | 3.609210000             | 1.190130000  | -2.087749000 |
| C  | 4.422535000             | 4.121407000  | -0.593328000 |
| H  | 3.995308000             | 4.627100000  | 1.451612000  |
| H  | 4.697883000             | 3.341446000  | -2.578755000 |
| H  | 4.903748000             | 5.068462000  | -0.810834000 |
| H  | -1.194520000            | -0.756240000 | 3.641486000  |
| H  | -1.374762000            | 0.871432000  | 2.974029000  |
| H  | 1.065888000             | 1.172594000  | 2.946899000  |
| H  | 1.115648000             | -0.402372000 | 3.748060000  |
| H  | 0.145739000             | -1.658088000 | 1.919859000  |
| C  | 0.322128000             | -3.012163000 | 1.653024000  |
| C  | -0.496019000            | -3.694790000 | 2.609977000  |
| O  | -0.162691000            | -4.095296000 | 3.722011000  |
| C  | -0.113511000            | -2.987426000 | 0.217548000  |

|   |              |              |              |
|---|--------------|--------------|--------------|
| H | -1.167034000 | -3.260518000 | 0.100439000  |
| H | -0.023513000 | -1.963208000 | -0.240062000 |
| H | 0.478914000  | -3.627813000 | -0.441856000 |
| H | -1.564430000 | -3.815633000 | 2.302924000  |
| H | 1.390625000  | -3.160208000 | 1.816664000  |

---

## References

- 1 L. C. Allen, D. A. Egolf, E. T. Knight and C. Liang, Bond Polarity Index, *J. Phys. Chem.*, 1990, **94**, 5602-5607.
- 2 T. Lu and F. Chen, Multiwfn: a multifunctional wavefunction analyzer, *J. Comput. Chem.*, 2012, **33**, 580-592.
- 3 E. D. Glendening and F. Weinhold, Natural Resonance Theory: I. General Formalism, *J. Comput. Chem.*, 1998, **19**, 593-609
- 4 K. H. Hopmann, Quantum chemical studies of asymmetric reactions: Historical aspects and recent examples, *Int. J. Quantum Chem.*, 2015, **115**, 1232-1249.
